# Supplementary material for: Electrochemical dual oxidative C(sp3)–H amination: switchable synthesis of imidazo-fused quinazolinones
Source: Royal Society of Chemistry journal article supplement (doi:10.1039/d4cc00994k), 2024-01-01

# Supporting Information

## Electrochemical Dual Oxidative C(sp<sup>3</sup>)-H Amination: Switchable Synthesis of Imidazo-Fused Quinazolinones

Chengbin Du,<sup>†</sup> Yan Zhang,<sup>†</sup> Tong Li, Zhenggen Zha and Zhiyong Wang\*

\*Hefei National Center for Physical Sciences at Microscale, Key Laboratory of Precision and Intelligent Chemistry, School of Chemistry and Materials Science, University of Science and Technology of China, Hefei 230026, China.

\*E-mail: zwang3@ustc.edu.cn.

### Table of Contents

|                                           |     |
|-------------------------------------------|-----|
| General Information .....                 | S2  |
| Substrates Preparation .....              | S2  |
| Optimization of Reaction Conditions ..... | S6  |
| Experimental Procedure .....              | S7  |
| Control Experiments.....                  | S8  |
| The Proof of Mechanism Experiment. ....   | S10 |
| Cyclic Voltammetry Studies.....           | S11 |
| Detail Descriptions for Products .....    | S13 |
| Supporting Reference .....                | S24 |
| Copies of Product NMR Spectra .....       | S25 |

## General Information

Unless otherwise noted, materials were obtained from commercial suppliers and used without further purification. NMR spectra were recorded on a Bruker AV-500 ( $^1\text{H}$ : 500 MHz,  $^{13}\text{C}$ : 125 MHz,  $^{19}\text{F}$  NMR: 470 MHz) spectrometer using TMS as internal reference. Chemical shifts ( $\delta$ ) and coupling constants ( $J$ ) were expressed in ppm and Hz, respectively. GC-MS was Shimadzu QP-5050 GC-MS system. Commercially available compounds were used without further purification. GC-MS was Shimadzu QP-5050 GC-MS system. Commercially available compounds were used without further purification. All substances were known compounds and synthesized according to the literature.<sup>1</sup> High resolution mass spectra (HRMS) were measured using electrospray ionization (ESI) and the time-of-flight (TOF) mass analyzer. The anode electrode and cathode electrode all are Pt ( $1.0 \times 1.0 \text{ cm}^2$ ). These electrodes are commercially available from GaossUnion, China.

## Substrates Preparation

**General Procedure for the preparation of methylquinazolinone derivatives.**

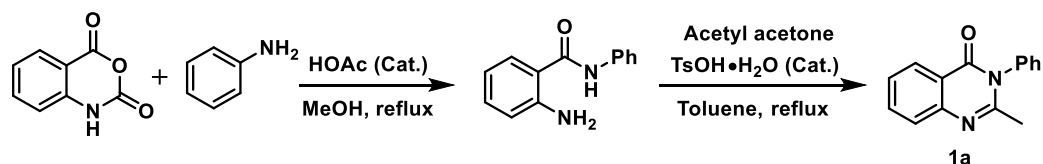

A suspension of isatoic anhydride, 1.1 equiv of aryl- or benzyl-amine and 1% AcOH in MeOH was stirred at 75 °C for 10 h. After the reaction was completed, as indicated by TLC (eluent hexane: EtOAc = 6:4), the brown solution was filtered in a Büchner funnel that had been packed with a layer of celite and activated charcoal; the colorless solution was then evaporated under reduced pressure. Recrystallization from Et<sub>2</sub>O afforded benzamide.<sup>[S1]</sup>

In a sealed tube equipped with a magnetic bar was charged with 2-amino benzamide derivatives (1, 3.67 mmol), acetyl acetone (4.04 mmol) and TsOH·H<sub>2</sub>O (0.73 mmol) in toluene (5 mL). The reaction mixture was stirred at 120 °C for 10 h. After completion of the reaction, the reaction mass was cooled to room temperature, diluted with EtOAc, gave a water wash and the organic layer was dried over anhydrous Na<sub>2</sub>SO<sub>4</sub> and concentrated in vacuo. The crude product was purified by flash column chromatography (eluent hexane: EtOAc = 6:4) on silica gel to afford the desired product.<sup>[S2]</sup> Similarly, the other methylquinazolinones derivatives were prepared.

**Procedure for the preparation of 5 (2-(iodomethyl)-3-phenylquinazolin-4(3H)-one).**<sup>[S3]</sup>

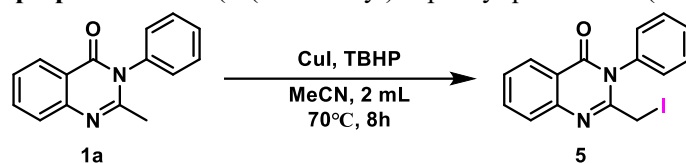

Methylquinazolinone (1a, 0.5mmol), CuI (0.75mmol), TBHP (8.0 eq., 70% aqueous solution) and CH<sub>3</sub>CN (2mL) were stirred at 70 °C for 8h. Then, the reaction mixture was diluted by water and extracted with CH<sub>2</sub>Cl<sub>2</sub> (3×15mL). The I<sub>2</sub> in organic phase was quenched by Na<sub>2</sub>S<sub>2</sub>O<sub>3</sub>. The combined organic layers were washed with saturated NH<sub>4</sub>Cl aqueous solution and dried over anhydrous Na<sub>2</sub>SO<sub>4</sub>. After filtration, the solvent was evaporated in vacuo. The desired product was obtained by

silica gel chromatography (eluent hexane: EtOAc = 6:4).

**2-(iodomethyl)-3-phenylquinazolin-4(3H)-one (5):**  $^1\text{H}$  NMR (500 MHz,  $\text{CDCl}_3$ )  $\delta$  8.28 (dd,  $J = 7.9, 1.6$  Hz, 1H), 7.80 (ddd,  $J = 8.5, 7.1, 1.6$  Hz, 1H), 7.73 (dd,  $J = 8.2, 1.2$  Hz, 1H), 7.60 – 7.55 (m, 3H), 7.52 (ddd,  $J = 8.1, 7.1, 1.3$  Hz, 1H), 7.46 – 7.41 (m, 2H), 4.12 (s, 2H).  $^{13}\text{C}$  NMR (125 MHz,  $\text{CDCl}_3$ )  $\delta$  161.8, 152.9, 146.8, 135.7, 134.4, 129.5, 129.3, 128.1, 127.2, 126.9, 126.8, 120.5, 29.3.

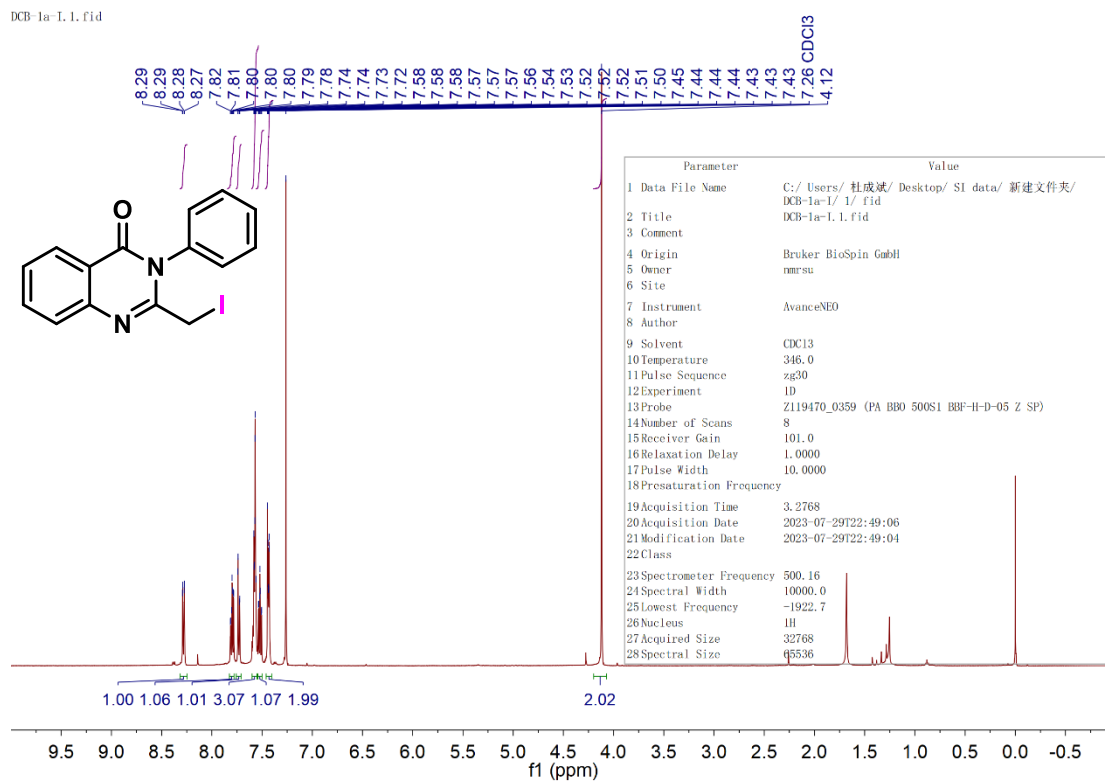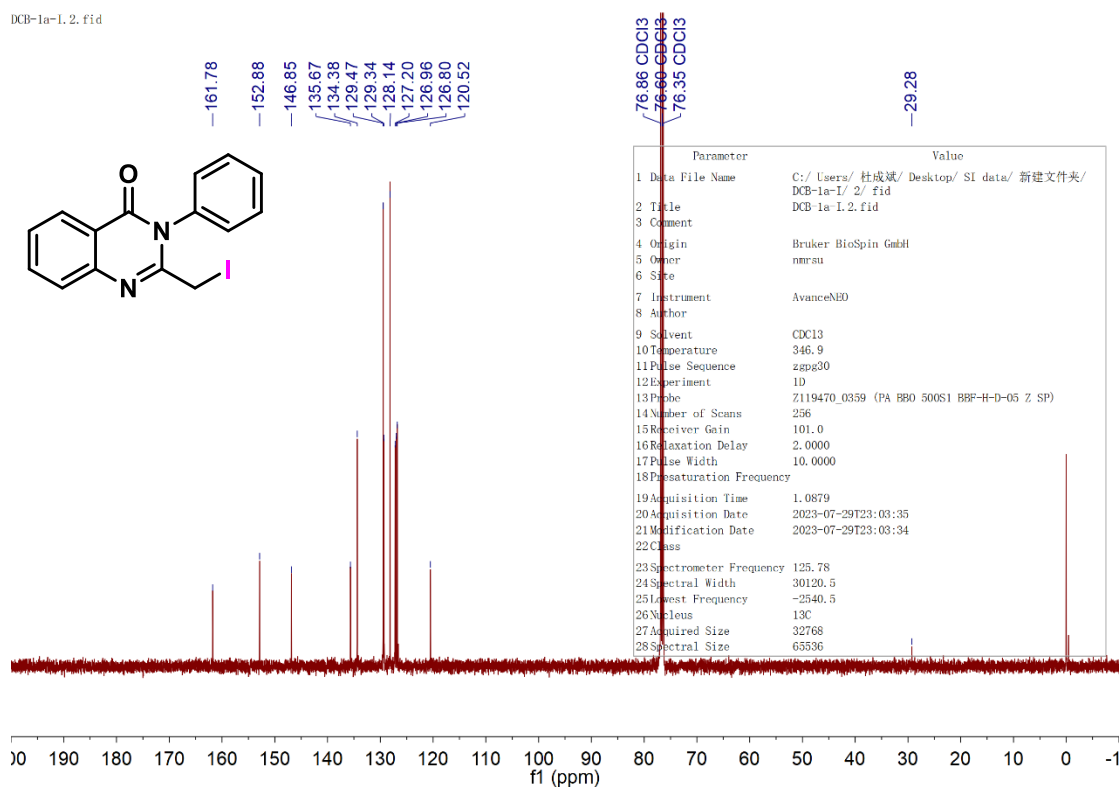

**Procedure for the preparation of 6** [2-((benzylamino)methyl)-3-phenylquinazolin-4(3*H*)-one]. [S4, S5]

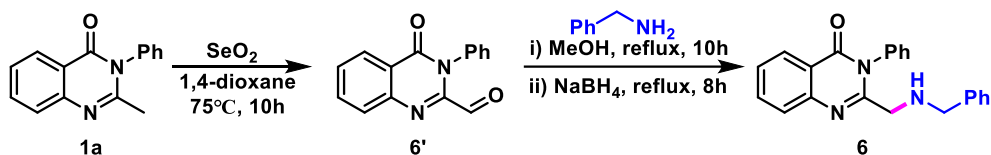

Methylquinazolinone(**1a**) was first oxidized to the aldehyde by selenium dioxide(2 equiv) in dioxane at 75 °C for 10h. After filtration, the solvent was evaporated in vacuo. The desired aldehyde (**6'**) was obtained by silica gel chromatography (eluent hexane: EtOAc = 6:4). Then, the aldehyde (**6'**) was added to 20 mL of ethanol in a 100 mL single-necked flask at room temperature, and primary amine (0.95 equiv) was added, and the mixture was heated to 80° C. and refluxed for 10 h. Cool to room temperature, weigh sodium borohydride (4 equiv) and slowly add it to the reaction system, and heat to 70° C. to react for 8 h. After returning to room temperature, it was quenched with 10% potassium carbonate solution, extracted with dichloromethane, washed with saturated brine, and dried with anhydrous Na<sub>2</sub>SO<sub>4</sub>. Filter and remove the solvent to obtain a grape-red liquid. The desired product was obtained by silica gel chromatography (eluent hexane: EtOAc = 6:4).

**4-oxo-3-phenyl-3,4-dihydroquinazoline-2-carbaldehyde (6')**: <sup>1</sup>H NMR (500 MHz, CDCl<sub>3</sub>) δ 9.57 (s, 1H), 8.37 (d, *J* = 7.9 Hz, 1H), 7.96 (d, *J* = 8.2 Hz, 1H), 7.89 (t, *J* = 7.7 Hz, 1H), 7.68 (t, *J* = 7.5 Hz, 1H), 7.55 (d, *J* = 6.2 Hz, 3H), 7.27 (d, *J* = 2.6 Hz, 1H). <sup>13</sup>C NMR (125 MHz, CDCl<sub>3</sub>) 185.3, 161.4, 146.8, 146.3, 135.3, 135.1, 130.0, 129.6, 129.5, 128.9, 127.9, 127.5, 122.5.

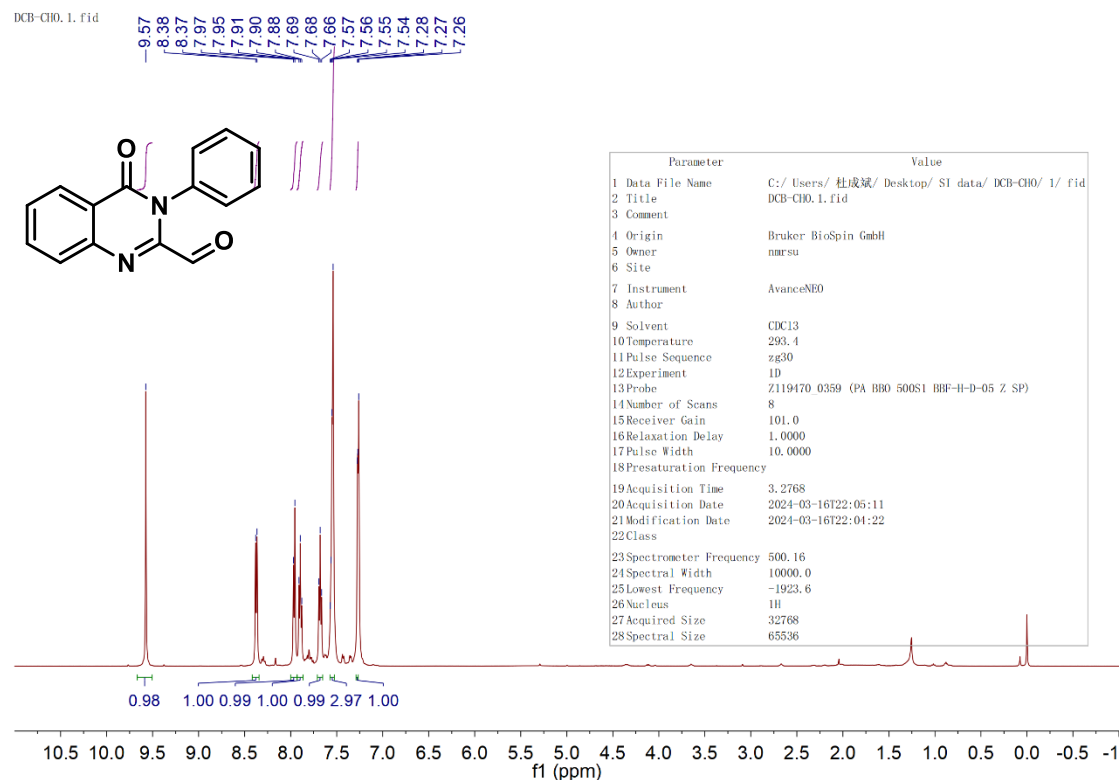

DCB-CH0.2.fid

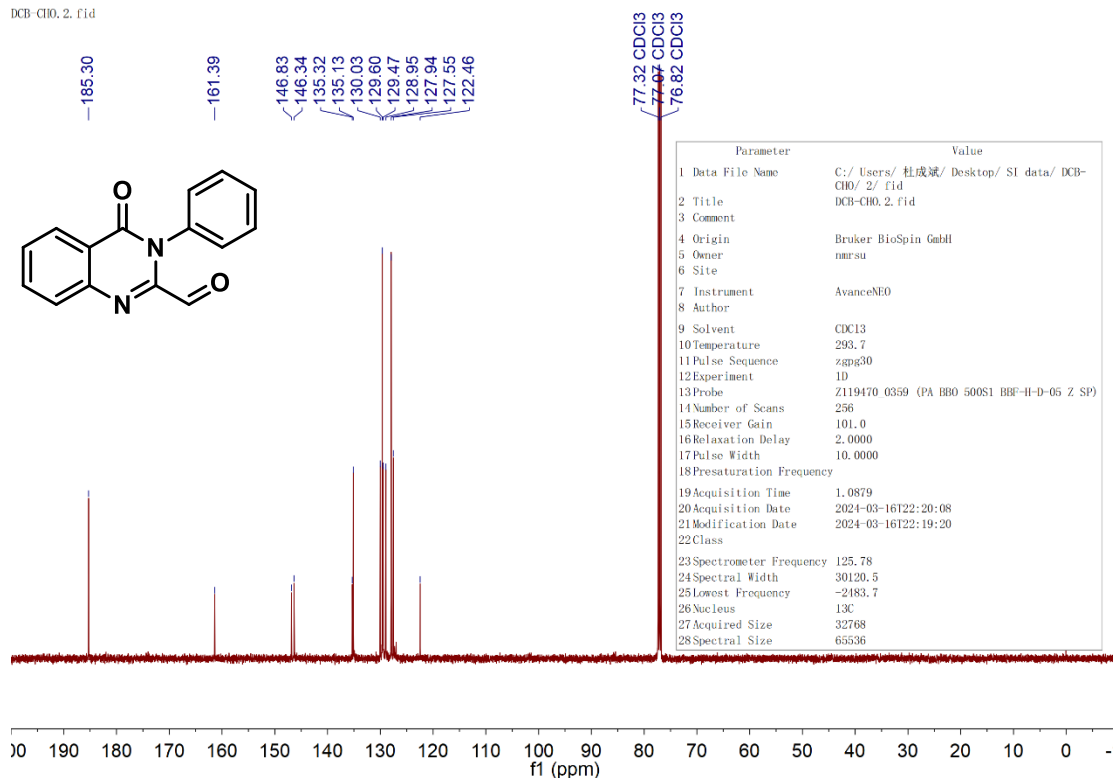

**2-((benzylamino)methyl)-3-phenylquinazolin-4(3H)-one (6):**  $^1\text{H}$  NMR (500 MHz,  $\text{CDCl}_3$ )  $\delta$  8.34 – 8.19 (m, 1H), 7.75 (dd,  $J = 6.2, 1.6$  Hz, 2H), 7.56 – 7.43 (m, 4H), 7.33 – 7.16 (m, 7H), 3.75 (s, 2H), 3.45 (s, 2H), 2.51 (br, 1H).  $^{13}\text{C}$  NMR (125 MHz,  $\text{CDCl}_3$ )  $\delta$  162.2, 154.5, 147.2, 139.6, 136.1, 134.6, 129.9, 129.5, 128.5, 128.3, 128.2, 127.3, 127.2, 127.1, 126.9, 121.1, 53.4, 51.4.

DCB0318-6.1.fid

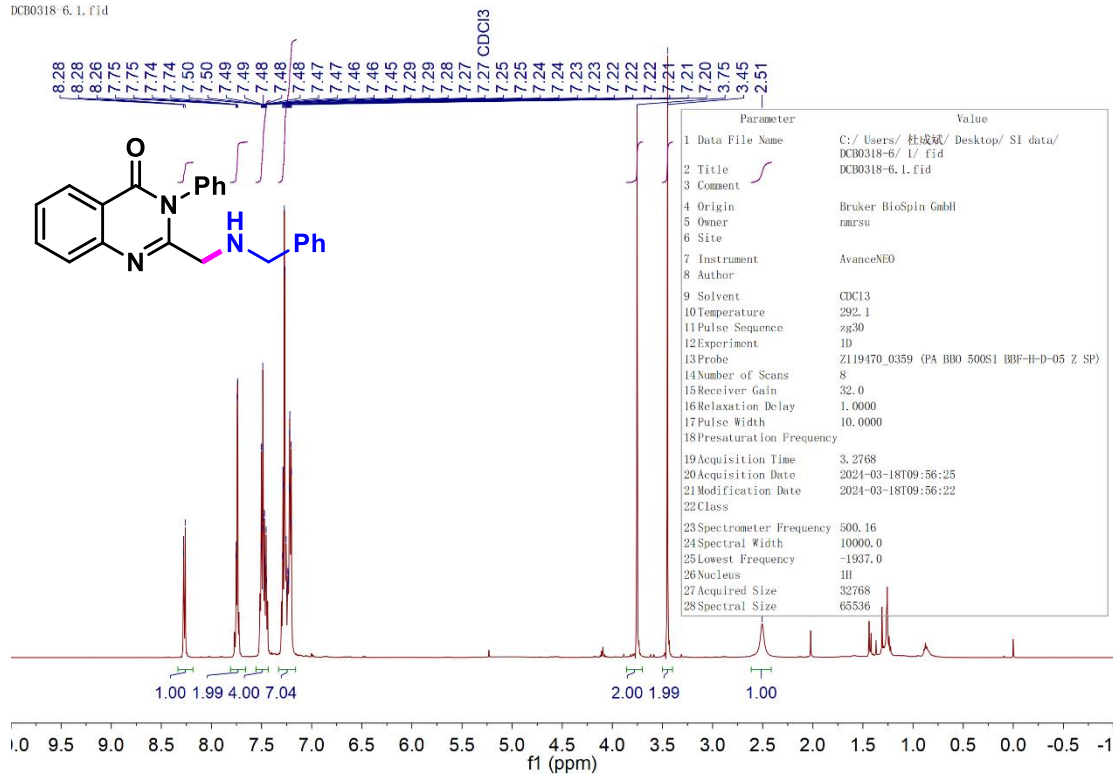

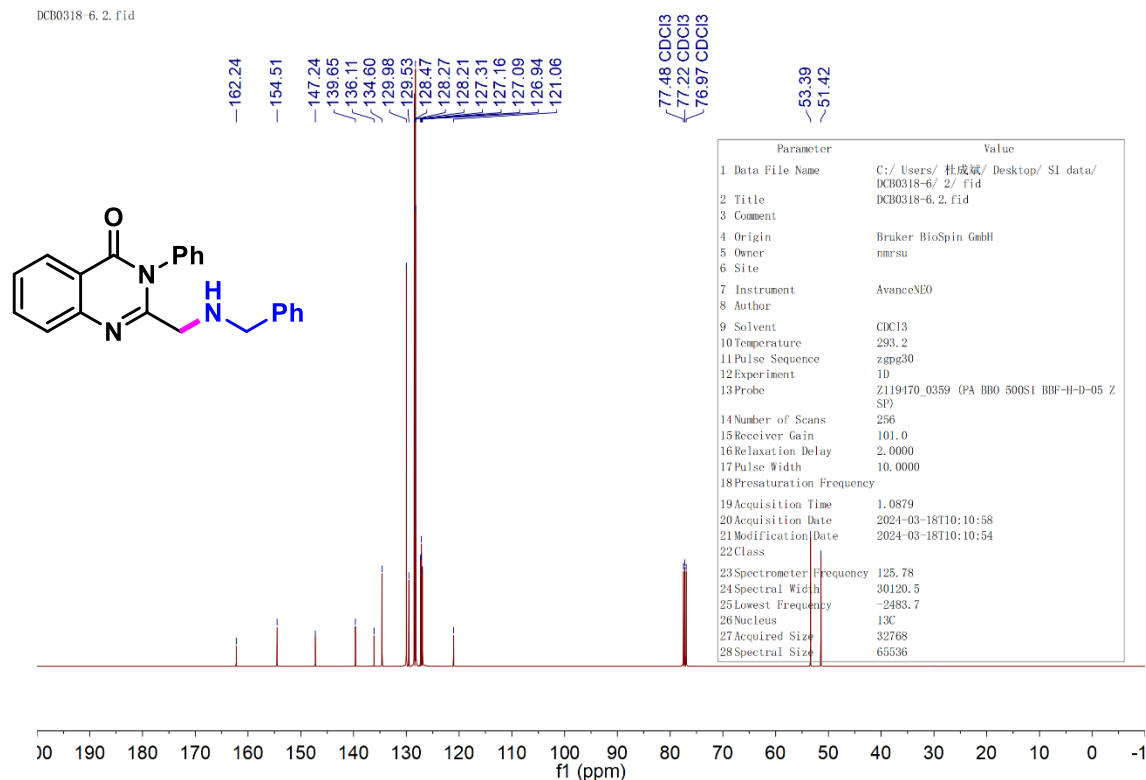

## Optimization of Reaction Conditions

Table S1: Optimization of the *N*-heterocycles reaction conditions. <sup>a</sup>

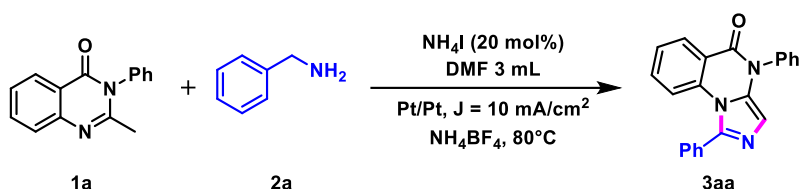

| entry | variations from standard conditions                                                                                       | yield <sup>b</sup> (%)     |
|-------|---------------------------------------------------------------------------------------------------------------------------|----------------------------|
| 1     | none                                                                                                                      | 93                         |
| 2     | no electricity                                                                                                            | n. d.                      |
| 3     | DMA, DMSO, NMP instead DMF                                                                                                | 32, 17, n. d. <sup>c</sup> |
| 4     | TEMPO, NHPI instead of NH <sub>4</sub> I                                                                                  | n.d., n.d.                 |
| 5     | <i>n</i> Bu <sub>4</sub> NI, Me <sub>4</sub> NI, KI instead of NH <sub>4</sub> I                                          | 53, 47, 66                 |
| 6     | 30 mol% or 10 mol% NH <sub>4</sub> I                                                                                      | 75, 31                     |
| 7     | a graphite plate as cathode                                                                                               | 46                         |
| 8     | a graphite plate as anode                                                                                                 | 75                         |
| 9     | 15 mA, 6.7 h instead of 10 mA, 10 h                                                                                       | 88                         |
| 10    | 5 mA, 20 h instead of 10 mA, 10 h                                                                                         | 79                         |
| 11    | <i>n</i> Bu <sub>4</sub> NBF <sub>4</sub> , NH <sub>4</sub> PF <sub>6</sub> or instead of NH <sub>4</sub> BF <sub>4</sub> | 64, 71                     |
| 12    | 70°C, 90°C or 100°C instead of 80°C                                                                                       | 43, 87, 75                 |

<sup>a</sup> Standard conditions 1: platinum plate (10 mm × 10 mm × 0.2mm) as the anode, platinum plate (10 mm × 10 mm × 0.2mm) as the cathode, undivided cell, 1a (0.3 mmol), 2a (0.9 mmol), NH<sub>4</sub>I (20 mol%), NH<sub>4</sub>BF<sub>4</sub> (0.3 mol), DMF (3.0 mL), Air, 80 °C, 10 h.

<sup>b</sup> Isolated yields. DMA: N, N-Dimethylacetamide, DMSO: Dimethyl sulfoxide, NMP: N-Methyl pyrrolidone, TEMPO: 2,2,6,6-tetramethylpiperidine-1-oxyl, NHPI: N-hydroxyphthalimide.

<sup>c</sup> n. d. = not detected.

**Table S2:** Optimization of the cyanide-functionalization reaction conditions. <sup>a</sup>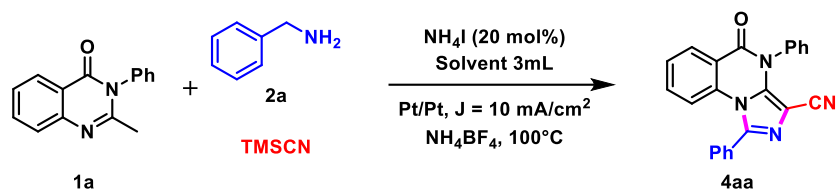

| entry     | Solvent            | Equivalent of $\text{NH}_4\text{BF}_4$ | Temperature( $^\circ\text{C}$ ) | Yield (%) <sup>b</sup> |
|-----------|--------------------|----------------------------------------|---------------------------------|------------------------|
| 1         | DMF                | 1.0                                    | 100                             | 58                     |
| 2         | DMA                | 1.0                                    | 100                             | 70                     |
| 3         | DMSO               | 1.0                                    | 100                             | 43                     |
| 4         | DMA/DMF=2/1        | 1.0                                    | 100                             | 81                     |
| 5         | DMA/DMF=5/1        | 1.0                                    | 100                             | 89                     |
| 6         | DMA/DMF=10/1       | 1.0                                    | 100                             | 87                     |
| 7         | DMA/DMF=5/1        | 1.0                                    | 90                              | 72                     |
| 8         | DMA/DMF=5/1        | 1.0                                    | 110                             | 81                     |
| 9         | DMA/DMF=5/1        | 0.5                                    | 100                             | 82                     |
| <b>10</b> | <b>DMA/DMF=5/1</b> | <b>1.5</b>                             | <b>100</b>                      | <b>91</b>              |
| 11        | DMA/DMF=5/1        | 2.0                                    | 100                             | 85                     |

<sup>a</sup> Unless otherwise noted, all reactions were performed with **1a** (0.3 mmol), **2a** (0.9 mmol),  $\text{NH}_4\text{I}$  (0.06 mmol),  $\text{NH}_4\text{BF}_4$  (0.45 mol), Trimethylsilyl cyanide (0.3 mmol), DMF (3.0 mL). The reaction was carried out at  $100^\circ\text{C}$  for 15 h.

<sup>b</sup> Isolated yield.

## Experimental Procedure

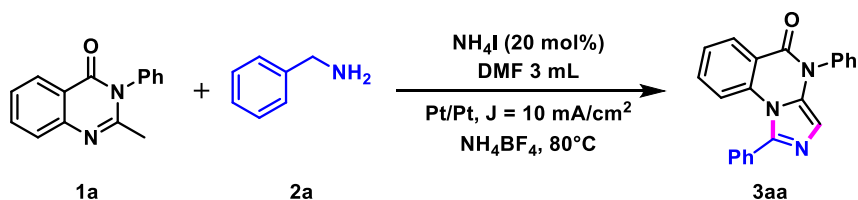

**Typical Procedure 1 for imidazo-fused N-heterocycles:** A mixture of 2-methyl-3-phenylquinazolin-4(3H)-one (0.3 mmol), benzylamine (0.9 mmol), ammonium tetrafluoroborate (0.3 mmol) and  $\text{NH}_4\text{I}$  (0.06 mmol) and DMF = 3 mL was added to an undivided cell. The cell was equipped with platinum electrode as both the anode and cathode. The reaction mixture was stirred and electrolyzed at a constant current of 10 mA under  $80^\circ\text{C}$  for corresponding time. When the reaction was finished, the solution was extracted with EtOAc ( $3 \times 10 \text{ mL}$ ). The combined organic layer was dried with  $\text{Na}_2\text{SO}_4$ , filtered. The solvent was removed with a rotary evaporator. The residue was purified by column chromatography on silica gel (PE/EtOAc = 3:1) to afford the desired product.

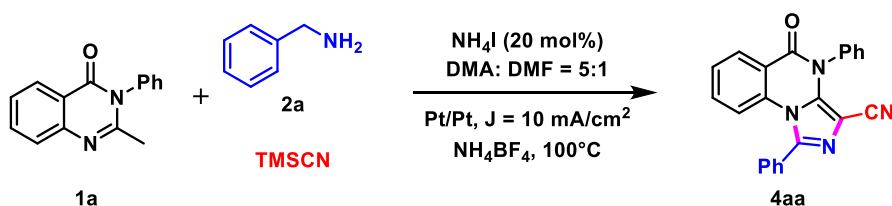

**Typical Procedure 2 for cyanide-functionalization imidazo-fused N-heterocycles:** A mixture of 2-methyl-3-phenylquinazolin-4(3H)-one (0.3 mmol), benzylamine (0.9 mmol), ammonium

tetrafluoroborate (0.45 mmol), Trimethylsilyl cyanide (0.9 mmol) and NH<sub>4</sub>I (0.06 mmol) and DMA:DMF = 2.5:0.5 mL was added to an undivided cell. The cell was equipped with platinum electrode as both the anode and cathode. The reaction mixture was stirred and electrolyzed at a constant current of 10 mA under 100°C for corresponding time. When the reaction was finished, the solution was extracted with EtOAc (3×10 mL). The combined organic layer was dried with Na<sub>2</sub>SO<sub>4</sub>, filtered. The solvent was removed with a rotary evaporator. The residue was purified by column chromatography on silica gel (PE/EtOAc = 3:1) to afford the desired product.

**Gram-scale synthesis of 3aa:** A mixture of 2-methyl-3-phenylquinazolin-4-(3*H*)-one (5 mmol), benzylamine (15 mmol), ammonium tetrafluoroborate (5 mmol) and NH<sub>4</sub>I (1 mmol) and DMF = 60 mL was added to an undivided cell. The cell was equipped with platinum electrode as both the anode and cathode. The reaction mixture was stirred and electrolyzed ( $J = 10 \text{ mA/cm}^2$ ,  $I = 23 \text{ mA}$ ) under 80°C for 2.5 days. When the reaction was finished, the solution was extracted with EtOAc (3×100 mL). The combined organic layer was dried with Na<sub>2</sub>SO<sub>4</sub>, filtered. The solvent was removed with a rotary evaporator. The residue was purified by column chromatography on silica gel (PE/EtOAc = 3:1) to afford the desired product.

**Gram-scale synthesis of 4aa:** A mixture of 2-methyl-3-phenylquinazolin-4-(3*H*)-one (5 mmol), benzylamine (15 mmol), ammonium tetrafluoroborate (7.5 mmol), Trimethylsilyl cyanide (7.5 mmol) and NH<sub>4</sub>I (1 mmol) and DMA = 50 mL, DMF = 10 mL was added to an undivided cell. The cell was equipped with platinum electrode as both the anode and cathode. The reaction mixture was stirred and electrolyzed ( $J = 10 \text{ mA/cm}^2$ ,  $I = 23 \text{ mA}$ ) under 100°C for 2.5 days. When the reaction was finished, the solution was extracted with EtOAc (3×100 mL). The combined organic layer was dried with Na<sub>2</sub>SO<sub>4</sub>, filtered. The solvent was removed with a rotary evaporator. The residue was purified by column chromatography on silica gel (PE/EtOAc = 3:1) to afford the desired product.

## Control Experiments

**Scheme 2a: for TEMPO:** A mixture of 2-methyl-3-phenylquinazolin-4-(3*H*)-one (0.3 mmol), benzylamine (0.9 mmol), ammonium tetrafluoroborate (0.3 mmol) and NH<sub>4</sub>I (0.06 mmol), 2,2,6,6-tetramethylpiperidinoxy (TEMPO, 0.6 mmol) and DMF = 3 mL was added to an undivided cell. The cell was equipped with platinum electrode as both the anode and cathode. The reaction mixture was stirred and electrolyzed at a constant current of 10 mA under 80°C for corresponding time. HRMS (ESI)  $m/z$  calcd for C<sub>22</sub>H<sub>29</sub>N<sub>3</sub>O<sub>2</sub>[M+H]<sup>+</sup> 392.2333, found 392.2324.

**Scheme 2a: for BHT:** A mixture of 2-methyl-3-phenylquinazolin-4-(3*H*)-one (0.3 mmol), benzylamine (0.9 mmol), ammonium tetrafluoroborate (0.3 mmol) and NH<sub>4</sub>I (0.06 mmol), butylated hydroxytoluene (BHT, 0.6 mmol) and DMF = 3 mL was added to an undivided cell. The cell was equipped with platinum electrode as both the anode and cathode. The reaction mixture was stirred and electrolyzed at a constant current of 10 mA under 80°C for corresponding time. HRMS (ESI)  $m/z$  calcd for C<sub>22</sub>H<sub>29</sub>N<sub>3</sub>O<sub>2</sub>[M+Na]<sup>+</sup> 477.2512, found 477.2503.

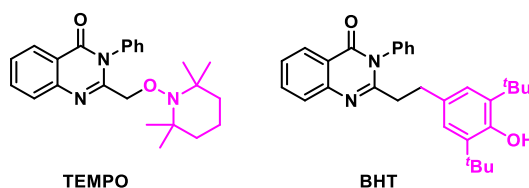

**Scheme 2b:** A mixture of 2-methyl-3-phenylquinazolin-4-(3*H*)-one (**1**) (0.3 mmol), benzylamine



(0.9 mmol), ammonium tetrafluoroborate (0.3 mmol) and iodine (0.03 mmol), and DMF = 3 mL was added to an undivided cell. The cell was equipped with platinum electrode as both the anode and cathode. The reaction mixture was stirred and electrolyzed at a constant current of 10 mA under 80°C for corresponding time. When the reaction was finished, the solution was extracted with EtOAc (3×10 mL). The combined organic layer was dried with Na<sub>2</sub>SO<sub>4</sub>, filtered. The solvent was removed with a rotary evaporator. The residue was purified by column chromatography on silica gel (PE/EtOAc = 3:1) to afford the desired product. The cyanation reaction is carried out according to standard conditions 2.

**Scheme 2c:** A mixture of 2-(iodomethyl)-3-phenylquinazolin-4(3H)-one (**5**) (0.3 mmol), benzylamine (0.9 mmol), ammonium tetrafluoroborate (0.3 mmol) and NH<sub>4</sub>I (0.06 mmol), and DMF = 3 mL was added to an undivided cell. The cell was equipped with platinum electrode as both the anode and cathode. The reaction mixture was stirred and electrolyzed at a constant current of 10 mA under 80°C for corresponding time. When the reaction was finished, the solution was extracted with EtOAc (3×10 mL). The combined organic layer was dried with Na<sub>2</sub>SO<sub>4</sub>, filtered. The solvent was removed with a rotary evaporator. The residue was purified by column chromatography on silica gel (PE/EtOAc = 3:1) to afford the desired product. The cyanation reaction is carried out according to standard conditions 2.

**Scheme 2d:** A mixture of 2-((benzylamino)methyl)-3-phenylquinazolin-4(3H)-one (**6**) (0.3 mmol), ammonium tetrafluoroborate (0.3 mmol) and NH<sub>4</sub>I (0.06 mmol) and DMF = 3 mL was added to an undivided cell. The cell was equipped with platinum electrode as both the anode and cathode. The reaction mixture was stirred and electrolyzed at a constant current of 10 mA under 80°C for corresponding time. When the reaction was finished, the solution was extracted with EtOAc (3×10 mL). The combined organic layer was dried with Na<sub>2</sub>SO<sub>4</sub>, filtered. The solvent was removed with a rotary evaporator. The residue was purified by column chromatography on silica gel (PE/EtOAc = 3:1) to afford the desired product. The cyanation reaction is carried out according to standard conditions 2.

**Scheme 2e:** 4-oxo-3-phenyl-3,4-dihydroquinazoline-2-carbaldehyde (**6'**) (0.3 mmol), benzylamine (0.9 mmol), ammonium tetrafluoroborate (0.3 mmol) and NH<sub>4</sub>I (0.06 mmol) and DMF = 3 mL was added to an undivided cell. The cell was equipped with platinum electrode as both the anode and cathode. The reaction mixture was stirred and electrolyzed at a constant current of 10 mA under 80°C for corresponding time. When the reaction was finished, the solution was extracted with EtOAc (3×10 mL). The solvent was removed with a rotary evaporator. The residue was purified by column chromatography on silica gel (PE/EtOAc = 3:1) to afford the desired product. The cyanation reaction is carried out according to standard conditions 2.

**Scheme 2f:** A mixture of A mixture of 2-methyl-3-phenylquinazolin-4-(3H)-one (0.3 mmol), benzylamine (0.9 mmol) or Trimethylsilyl cyanide (0.9 mmol), ammonium tetrafluoroborate (0.3 mmol) and NH<sub>4</sub>I (0.06 mmol) and DMF: DMA = 2.5: 0.5 mL was added to an undivided cell. The cell was equipped with platinum electrode as both the anode and cathode. The reaction mixture was stirred and electrolyzed at a constant current of 10 mA under 100°C for corresponding time. When the reaction was finished, the solution was extracted with EtOAc (3×10 mL). The combined organic layer was dried with Na<sub>2</sub>SO<sub>4</sub>, filtered. The solvent was removed with a rotary evaporator. The residue was purified by column chromatography on silica gel (PE/EtOAc = 3:1) to afford the desired product.

## The Proof of Mechanism Experiment.

**Constant potential experiment:** A mixture of 2-methyl-3-phenylquinazolin-4-(3*H*)-one (0.3 mmol), benzylamine (0.9 mmol), ammonium tetrafluoroborate (0.3 mmol) and  $\text{NH}_4\text{I}$  (0.06 mmol) and  $\text{DMF} = 3 \text{ mL}$  was added to an undivided cell. The cell was equipped with platinum electrode as both the anode and cathode. The reaction mixture was stirred and electrolyzed at a constant potential of 0.9V [the first oxidation potential of iodide ion 0.7V vs.  $\text{Ag}/\text{AgCl}$  (0.199V)] under  $80^\circ\text{C}$  for 75h. And we can get the desired product **3aa** with a yield of 49.7%, which indicated the iodine free radical is the catalyst of the system.

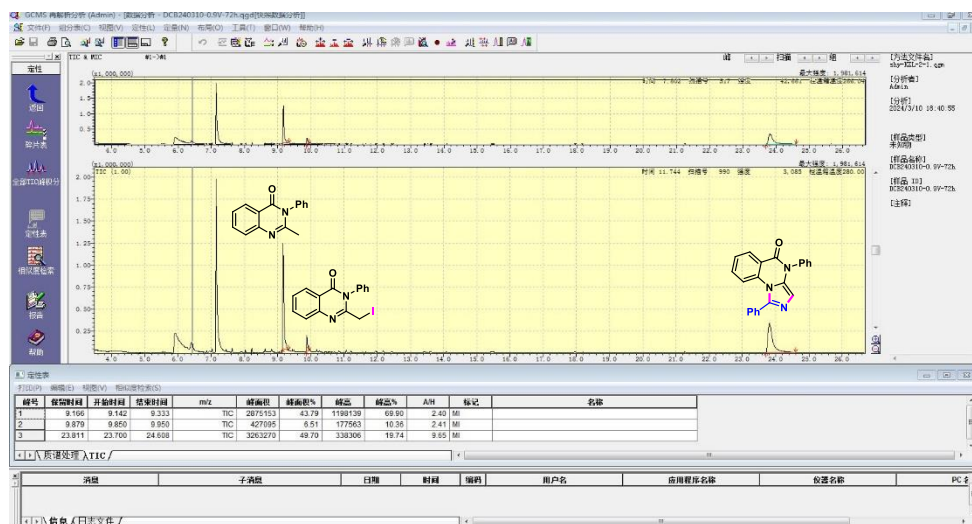

Figure S1. The GC-MS result of constant potential experiment

**Nitrogen atmosphere experiment:** A mixture of 2-methyl-3-phenylquinazolin-4-(3*H*)-one (0.3 mmol), benzylamine (0.9 mmol), ammonium tetrafluoroborate (0.3 mmol) and  $\text{NH}_4\text{I}$  (0.06 mmol), and  $\text{DMF} = 3 \text{ mL}$  was added to an undivided cell. The cell was equipped with platinum electrode as both the anode and cathode. The reaction mixture was stirred and electrolyzed at a constant current of 10 mA under  $80^\circ\text{C}$ . And we can get the desired product **3aa** with a yield of 62.2%, which indicated  $\text{O}_2$  is not necessary for the reaction and we think the mechanism of the iodide intermediates is suitable.

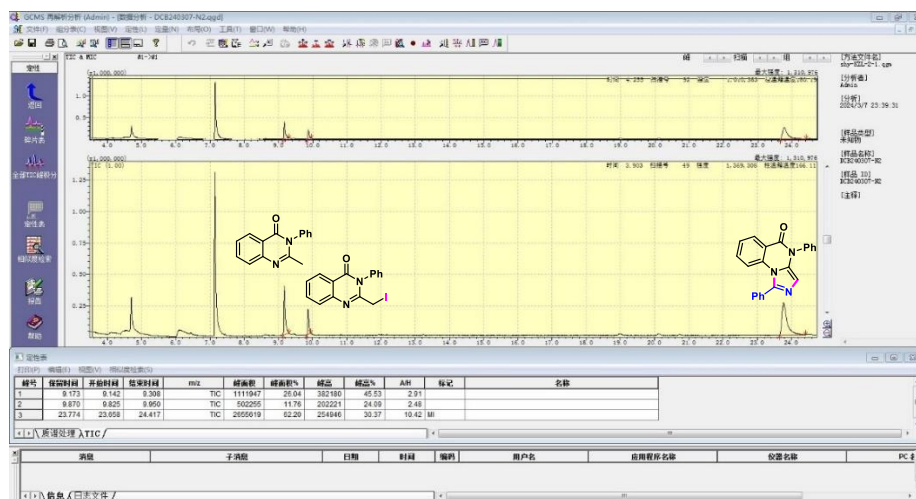

Figure S2. The GC-MS result of nitrogen atmosphere experiment

## Cyclic Voltammetry Studies

Cyclic voltammetry data were measured with a Shanghai Chenhua potentiostat (CHI760E).

**Working electrode:** The working electrode is a 3 mm diameter Pt disk working electrode.

Polished with 0.3  $\mu\text{m}$  aluminum oxide and then sonicated in distilled water before drying.

**Reference electrode:** The reference electrode consisted of a silver wire covered with silver chloride immersed in a saturated solution of potassium chloride.

**Counter electrode:** The counter electrode is a platinum wire that was polished with sand paper.

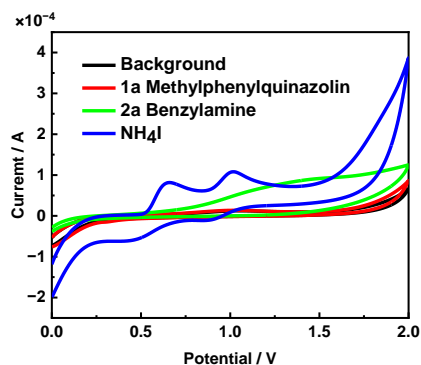

**Figure S3.** Cyclic voltammograms of **1a** in 0.1 M  $\text{NH}_4\text{BF}_4/\text{DMF}$  using a Pt disk as the working electrode, and Pt wire and Ag/AgCl as the counter and reference electrodes, at a scan rate of 100 mV/s: background (curve a), **1a** (5 mmol/L) (curve b), **2a** (15 mmol/L) (curve c), and  $\text{NH}_4\text{I}$  (2 mmol/L) (curve d).

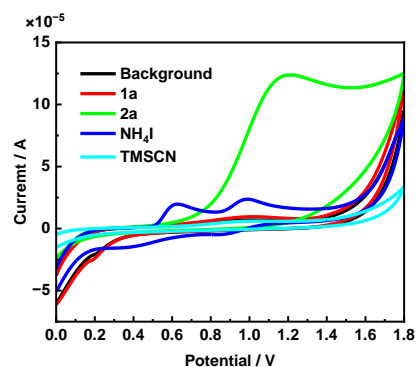

**Figure S4.** Cyclic voltammograms of **1a** and TMSCN in 0.1 M  $\text{NH}_4\text{BF}_4/(\text{DMA}+\text{DMF})$  using a Pt disk as the working electrode, and Pt wire and Ag/AgCl as the counter and reference electrodes, at a scan rate of 100 mV/s: background (curve a), **1a** (5 mmol/L) (curve b), **2a** (15 mmol/L) (curve c),  $\text{NH}_4\text{I}$  (2 mmol/L) (curve d), and TMSCN (15 mmol/L) (curve e).

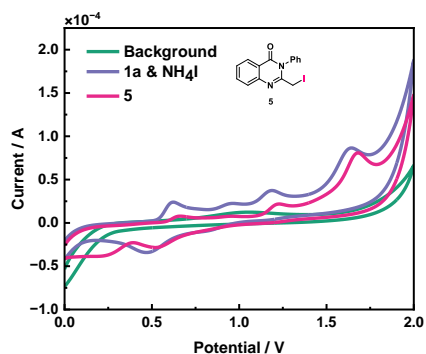

**Figure S5.** Cyclic voltammograms of **1a** in 0.1 M  $\text{NH}_4\text{BF}_4/\text{DMF}$  using a Pt disk as the working electrode, and Pt wire and Ag/AgCl as the counter and reference electrodes, at a scan rate of 100 mV/s: background (curve a), **1a** (5 mmol/L) and  $\text{NH}_4\text{I}$  (2 mmol/L) (curve b), and **5** (15 mmol/L) (curve c).

mmol/L) (curve b) and **5** (5 mmol/L) (curve c).

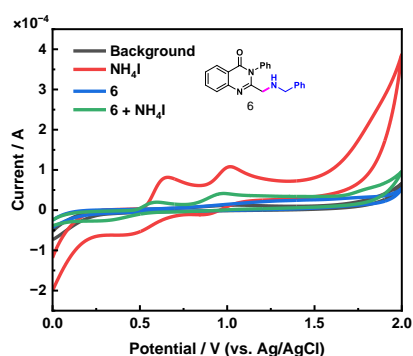

**Figure S6.** Cyclic voltammograms of **1a** in 0.1 M  $\text{NH}_4\text{BF}_4/\text{DMF}$  using a Pt disk as the working electrode, and Pt wire and Ag/AgCl as the counter and reference electrodes, at a scan rate of 100 mV/s: background (curve a),  $\text{NH}_4\text{I}$  (2 mmol/L) (curve b) and **6** (5 mmol/L) (curve c) and the mixture of **6** and  $\text{NH}_4\text{I}$  (curve d).

**Figure S3** and **Figure S4** showed that no obvious oxidation wave of 2-methyl-3-phenylquinazolin-4(3H)-one **1a** was observed (curve b in Fig. **S3**, curve b in Fig. **S4**). This result was perhaps due to the inertness of the  $\text{C}(\text{sp}^3)\text{-H}$  bond, and CV results indicated that the iodide anion should be oxidized first compared to benzylamine, and the following transformation can be initiated from this oxidized iodide ion, which should be the intermediate of this reaction. When **1a** was mixed with  $\text{NH}_4\text{I}$ , the results showed multiple new oxidation peak signals appeared, which indicated that iodine species could activate **1a** under electrochemical conditions. It coincided with the curve of iodinate **5**, which implied that compound **5** was a possible intermediate in the reaction. (Fig. **S5**) And no obvious oxidation wave of **6**, which indicated iodide anion was important for the next stage to get the desired products. (Fig. **S6**)

## Detail Descriptions for Products

### 1,4-diphenylimidazo[1,5-a]quinazolin-5(4H)-one (3aa)<sup>[S6]</sup>

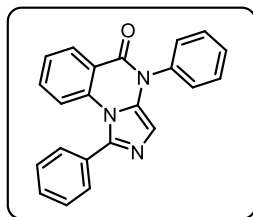

The title compound was prepared according to the general working procedure and purified by column chromatography (petroleum ether/ethyl acetate = 3:1) to give the product as a white solid. 93% yield, 94.1 mg. m.p. 216 - 217°C. <sup>1</sup>H NMR (500 MHz, CDCl<sub>3</sub>) δ 8.39 (d, *J* = 7.7 Hz, 1H), 7.72-7.45 (m, 10H), 7.39 (dt, *J* = 22.5, 6.9 Hz, 2H), 7.29 (d, *J* = 8.1 Hz, 1H), 6.29 (s, 1H). <sup>13</sup>C NMR (125 MHz, CDCl<sub>3</sub>) δ 157.8, 140.0, 136.3, 135.8, 134.0, 133.8, 132.6, 130.2, 130.0, 129.8, 129.6, 129.4, 129.0, 128.0, 125.9, 118.1, 116.6, 109.8. HRMS (ESI) *m/z* calcd for C<sub>22</sub>H<sub>15</sub>N<sub>3</sub>O [M+H]<sup>+</sup> 338.1288, found 338.1294.

### 1-(2-chlorophenyl)-4-phenylimidazo[1,5-a]quinazolin-5(4H)-one (3ab)

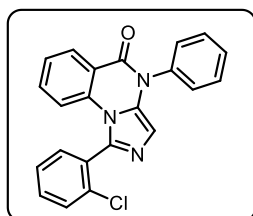

The title compound was prepared according to the general working procedure and purified by column chromatography (petroleum ether/ethyl acetate = 3:1) to give the product as a white solid. 85% yield, 94.8 mg. m.p. 225 - 226°C. <sup>1</sup>H NMR (500 MHz, CDCl<sub>3</sub>): δ 8.42 (dd, *J* = 7.8, 1.7 Hz, 1H), 7.68 - 7.38 (m, 11H), 7.01 (d, *J* = 8.3 Hz, 1H), 6.35 (s, 1H). <sup>13</sup>C NMR (125 MHz, CDCl<sub>3</sub>): δ 157.7, 136.6, 136.2, 135.7, 135.3, 134.3, 133.7, 132.5, 132.2, 131.6, 130.2, 130.1, 129.5, 128.0, 127.7, 126.1, 117.9, 115.2, 109.9. HRMS (ESI) *m/z* calcd for C<sub>22</sub>H<sub>14</sub>ClN<sub>3</sub>O [M+H]<sup>+</sup> 372.0898, found 372.0904.

### 1-(2-bromophenyl)-4-phenylimidazo[1,5-a]quinazolin-5(4H)-one (3ac)

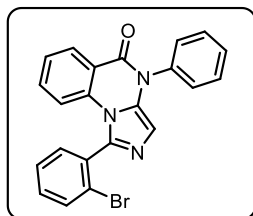

The title compound was prepared according to the general working procedure and purified by column chromatography (petroleum ether/ethyl acetate = 3:1) to give the product as a white solid. 84% yield, 104.9mg. m.p. 238 - 239°C. <sup>1</sup>H NMR (500 MHz, CDCl<sub>3</sub>): δ 8.41 (d, *J* = 7.7 Hz, 1H), 7.75 (d, *J* = 8.0 Hz, 1H), 7.65 - 7.38 (m, 10H), 6.97 (d, *J* = 8.3 Hz, 1H), 6.35 (s, 1H). <sup>13</sup>C NMR (125 MHz, CDCl<sub>3</sub>): δ 157.7, 137.8, 136.2, 135.6, 134.4, 134.3, 133.5, 133.2, 132.6, 131.8, 130.2, 130.1, 129.5, 128.2, 128.0, 126.1, 125.3, 117.8, 115.3, 109.7. HRMS (ESI) *m/z* calcd for C<sub>22</sub>H<sub>14</sub>BrN<sub>3</sub>O [M+H]<sup>+</sup> 415.0320, found 415.0327.

### 1-(3-fluorophenyl)-4-phenylimidazo[1,5-a]quinazolin-5(4H)-one (3ad)

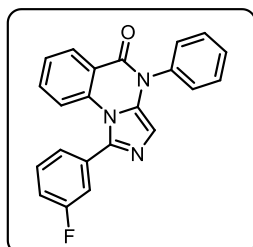

The title compound was prepared according to the general working procedure and purified by column chromatography (petroleum ether/ethyl acetate = 3:1) to give the product as a white solid. 92% yield, 98.1 mg. m.p. 220 - 221°C. <sup>1</sup>H NMR (500 MHz, CDCl<sub>3</sub>): δ 8.42 (dd, *J* = 7.8, 1.7 Hz, 1H), 7.61 (t, *J* = 7.6 Hz, 2H), 7.57 - 7.47 (m, 5H), 7.43 (d, *J* = 7.3 Hz, 2H), 7.37 (dt, *J* = 9.2, 2.0 Hz, 1H), 7.32 (d, *J* = 8.3 Hz, 1H), 7.24 (dd, *J* = 8.4, 2.6 Hz, 1H), 6.30 (s, 1H). <sup>13</sup>C NMR (125 MHz, CDCl<sub>3</sub>): δ 162.8 (d, *J* = 248.5 Hz), 157.7, 138.6, 138.6, 136.1, 135.5, 134.4 (d, *J* = 8.2 Hz), 134.3, 133.9, 130.7 (d, *J* = 8.4 Hz), 130.4, 130.0 (d, *J* = 116.8 Hz), 127.9, 126.2, 125.4 (d, *J* = 3.1 Hz), 118.2, 116.9 (d, *J* = 8.5 Hz), 116.8 (d, *J* = 10.1 Hz), 116.5, 110.0. <sup>19</sup>F NMR (470 MHz, CDCl<sub>3</sub>) δ -111.2. HRMS (ESI) *m/z* calcd for C<sub>22</sub>H<sub>14</sub>FN<sub>3</sub>O [M+H]<sup>+</sup> 356.1194, found 356.1201.

#### 4-phenyl-1-(4-(trifluoromethyl)phenyl)imidazo[1,5-a]quinazolin-5(4H)-one (3ae)

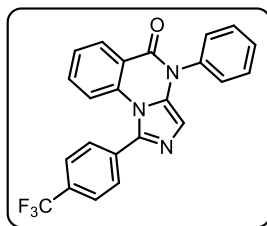

The title compound was prepared according to the general working procedure and purified by column chromatography (petroleum ether/ethyl acetate = 3:1) to give the product as a white solid. 85% yield, 103.3 mg. m.p. 170 - 171°C. <sup>1</sup>H NMR (500 MHz, CDCl<sub>3</sub>): δ 8.42 (dd, *J* = 7.8, 1.7 Hz, 1H), 7.79 (s, 4H), 7.63 – 7.48 (m, 6H), 7.45 – 7.40 (m, 1H), 7.34 – 7.28 (m, 1H), 6.33 (s, 1H). <sup>13</sup>C NMR (125 MHz, CDCl<sub>3</sub>): δ 157.7, 138.5, 136.0, 135.4, 134.6, 133.9, 131.5 (q, *J* = 33.0 Hz), 130.5, 130.2, 129.9, 129.5, 129.4, 128.7, 127.9, 127.5, 126.4, 126.0 (q, *J* = 3.7 Hz), 122.8 (q, *J* = 272.4 Hz) 118.3, 116.5, 110.5. <sup>19</sup>F NMR (470 MHz, CDCl<sub>3</sub>) δ -62.7. HRMS (ESI) *m/z* calcd for C<sub>23</sub>H<sub>14</sub>F<sub>3</sub>N<sub>3</sub>O [M+H]<sup>+</sup> 406.1162, found 406.1168.

#### 1-(4-methoxyphenyl)-4-phenylimidazo[1,5-a]quinazolin-5(4H)-one (3af)

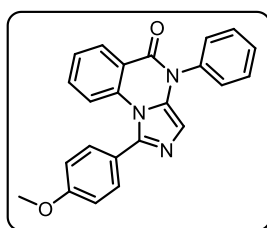

The title compound was prepared according to the general working procedure and purified by column chromatography (petroleum ether/ethyl acetate = 3:1) to give the product as a white solid. 98% yield, 108.0 mg. m.p. 243 - 244°C. <sup>1</sup>H NMR (500 MHz, CDCl<sub>3</sub>): δ 8.39 (d, *J* = 7.9 Hz, 1H), 7.67 – 7.29 (m, 10H), 7.05 (d, *J* = 8.2 Hz, 2H), 6.27 (s, 1H), 3.91 (s, 3H). <sup>13</sup>C NMR (125 MHz, CDCl<sub>3</sub>): δ 160.7, 157.7, 140.0, 136.3, 135.9, 133.8, 131.1, 130.2, 130.1, 129.4, 127.9, 125.9, 124.7, 118.2, 116.5, 114.5, 109.4, 55.4. HRMS (ESI) *m/z* calcd for C<sub>23</sub>H<sub>17</sub>N<sub>3</sub>O<sub>2</sub> [M+H]<sup>+</sup> 368.1394, found 368.1401.

#### 4-phenyl-1-(p-tolyl)imidazo[1,5-a]quinazolin-5(4H)-one (3ag)

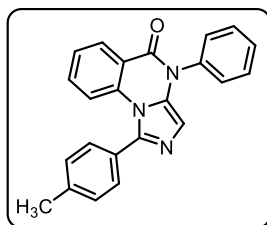

The title compound was prepared according to the general working procedure and purified by column chromatography (petroleum ether/ethyl acetate = 3:1) to give the product as a white solid. 96% yield, 101.2 mg. m.p. 238 - 239°C. <sup>1</sup>H NMR (500 MHz, CDCl<sub>3</sub>): δ 8.39 (dd, *J* = 7.8, 1.8 Hz, 1H), 7.60 (t, *J* = 7.6 Hz, 2H), 7.55-7.48 (m, 5H), 7.44-7.31 (m, 5H), 6.26 (s, 1H), 2.47 (s, 3H). <sup>13</sup>C NMR (125 MHz, CDCl<sub>3</sub>): δ 157.8, 140.2, 139.9, 136.2, 135.9, 133.9, 133.8, 130.2, 130.1, 129.8, 129.6, 129.5, 129.4, 128.0, 125.9, 118.1, 116.6, 109.6, 21.6. HRMS (ESI) *m/z* calcd for C<sub>23</sub>H<sub>17</sub>N<sub>3</sub>O [M+H]<sup>+</sup> 352.1444, found 352.1450.

#### 1-(4-fluorophenyl)-4-phenylimidazo[1,5-a]quinazolin-5(4H)-one (3ah)

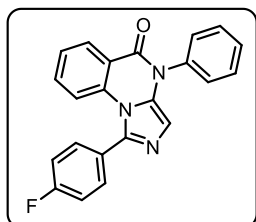

The title compound was prepared according to the general working procedure and purified by column chromatography (petroleum ether/ethyl acetate = 3:1) to give the product as a white solid. 93% yield, 99.1 mg. m.p. 221 - 222°C. <sup>1</sup>H NMR (500 MHz, CDCl<sub>3</sub>): δ 8.41 (dd, *J* = 7.8, 1.7 Hz, 1H), 7.66 – 7.40 (m, 9H), 7.29 – 7.19 (m, 3H), 6.28 (s, 1H). <sup>13</sup>C NMR (125 MHz, CDCl<sub>3</sub>): δ 1163.5 (d, *J* = 250.4 Hz), 157.7, 138.9, 135.9 (d, *J* = 57.0 Hz), 134.1, 133.9, 131.7 (d, *J* = 8.4 Hz), 130.4, 130.1, 129.5, 128.7, 127.9, 126.1, 118.2, 116.4 (d, *J* = 2.3 Hz), 116.2, 109.8. <sup>19</sup>F NMR (470 MHz, CDCl<sub>3</sub>) δ -110.3. HRMS (ESI) *m/z* calcd for C<sub>22</sub>H<sub>14</sub>FN<sub>3</sub>O [M+H]<sup>+</sup> 356.1194, found 356.1201.

### 1-(4-chlorophenyl)-4-phenylimidazo[1,5-a]quinazolin-5(4H)-one (3ai)

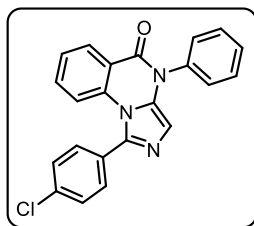

The title compound was prepared according to the general working procedure and purified by column chromatography (petroleum ether/ethyl acetate = 3:1) to give the product as a white solid. 92% yield, 102.6 mg. m.p. 225 - 226°C. <sup>1</sup>H NMR (500 MHz, CDCl<sub>3</sub>): δ 8.41 (dd, *J* = 7.8, 1.7 Hz, 1H), 7.62 – 7.56 (m, 4H), 7.56 – 7.46 (m, 6H), 7.42 (t, *J* = 7.5 Hz, 1H), 7.31 (d, *J* = 8.4 Hz, 1H), 6.29 (s, 1H). <sup>13</sup>C NMR (125 MHz, CDCl<sub>3</sub>): δ 157.7, 138.8, 136.1, 135.9, 135.6, 134.3, 133.9, 130.9, 130.4, 130.1, 129.6, 129.5, 129.4, 127.9, 126.2, 118.2, 116.5, 110.0. HRMS (ESI) *m/z* calcd for C<sub>22</sub>H<sub>14</sub>ClN<sub>3</sub>O [M+H]<sup>+</sup> 372.0898, found 372.0904.

### 1-(4-bromophenyl)-4-phenylimidazo[1,5-a]quinazolin-5(4H)-one (3aj)

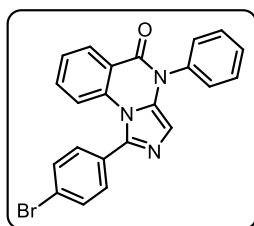

The title compound was prepared according to the general working procedure and purified by column chromatography (petroleum ether/ethyl acetate = 3:1) to give the product as a white solid. 90% yield, 112.4 mg. m.p. 246 - 247°C. <sup>1</sup>H NMR (500 MHz, CDCl<sub>3</sub>): δ 8.41 (d, *J* = 7.8 Hz, 1H), 7.67 (d, *J* = 8.1 Hz, 2H), 7.60 (t, *J* = 7.6 Hz, 2H), 7.52 (dq, *J* = 16.0, 7.5 Hz, 6H), 7.42 (t, *J* = 7.6 Hz, 1H), 7.32 (d, *J* = 8.4 Hz, 1H), 6.29 (s, 1H). <sup>13</sup>C NMR (125 MHz, CDCl<sub>3</sub>): δ 157.7, 138.8, 136.1, 135.6, 134.3, 133.9, 132.3, 131.4, 131.2, 130.5, 130.1, 129.5, 127.9, 126.2, 124.2, 118.2, 116.5, 110.0. HRMS (ESI) *m/z* calcd for C<sub>22</sub>H<sub>14</sub>BrN<sub>3</sub>O [M+H]<sup>+</sup> 416.0393, found 416.0399.

### 1-(2-chloro-4-fluorophenyl)-4-phenylimidazo[1,5-a]quinazolin-5(4H)-one (3ak)

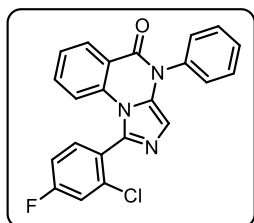

The title compound was prepared according to the general working procedure and purified by column chromatography (petroleum ether/ethyl acetate = 3:1) to give the product as a white solid. 87% yield, 104.1 mg. m.p. 232 - 234°C. <sup>1</sup>H NMR (500 MHz, CDCl<sub>3</sub>): δ 8.42 (dd, *J* = 7.9, 1.7 Hz, 1H), 7.61 (q, *J* = 8.1 Hz, 3H), 7.55 – 7.48 (m, 4H), 7.46 – 7.42 (m, 1H), 7.36 (dd, *J* = 8.2, 2.0 Hz, 1H), 7.27 (td, *J* = 9.6, 2.2 Hz, 2H), 6.35 (s, 1H). <sup>13</sup>C NMR (125 MHz, CDCl<sub>3</sub>): δ 160.4 (d, *J* = 253.5 Hz), 157.6, 137.3 (d, *J* = 9.8 Hz), 136.1, 135.6, 134.5, 134.2, 132.8 (d, *J* = 2.9 Hz), 132.8, 130.3, 130.1, 129.5, 127.9, 126.3, 125.6, 125.6, 119.8 (d, *J* = 15.3 Hz), 118.1, 117.1 (d, *J* = 24.4 Hz), 115.2, 110.6. <sup>19</sup>F NMR (470 MHz, CDCl<sub>3</sub>) δ -109.4. HRMS (ESI) *m/z* calcd for C<sub>22</sub>H<sub>13</sub>ClFN<sub>3</sub>O [M+H]<sup>+</sup> 390.0804, found 390.0810.

### 1-(benzo[d][1,3]dioxol-5-yl)-4-phenylimidazo[1,5-a]quinazolin-5(4H)-one (3al)

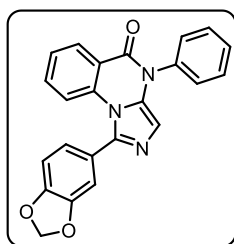

The title compound was prepared according to the general working procedure and purified by column chromatography (petroleum ether/ethyl acetate = 3:1) to give the product as a white solid. 87% yield, 99.5 mg. m.p. 238 - 239°C. <sup>1</sup>H NMR (500 MHz, CDCl<sub>3</sub>): δ 8.39 (d, *J* = 7.9 Hz, 1H), 7.67 – 7.32 (m, 8H), 7.20 – 6.87 (m, 3H), 6.25 (s, 1H), 6.08 (s, 2H). <sup>13</sup>C NMR (125 MHz, CDCl<sub>3</sub>): δ 157.7, 148.9, 148.1, 139.6, 136.2, 135.8, 133.8, 130.3, 130.1, 129.4, 128.0, 125.9, 123.9, 118.2, 116.6, 110.0, 109.5, 108.9, 101.6. HRMS (ESI) *m/z* calcd for C<sub>23</sub>H<sub>15</sub>N<sub>3</sub>O<sub>3</sub> [M+H]<sup>+</sup> 382.1186, found 382.1194.

#### 4-phenyl-1-(thiophen-2-yl)imidazo[1,5-a]quinazolin-5(4H)-one (3am)

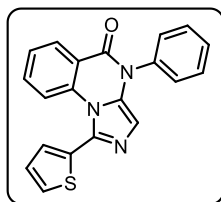

The title compound was prepared according to the general working procedure and purified by column chromatography (petroleum ether/ethyl acetate = 3:1) to give the product as a white solid. 83% yield, 85.5 mg. m.p. 221 - 223°C. <sup>1</sup>H NMR (500 MHz, CDCl<sub>3</sub>): δ 8.40 (dd, *J* = 7.8, 1.7 Hz, 1H), 7.62 – 7.56 (m, 3H), 7.55 – 7.47 (m, 4H), 7.44 – 7.33 (m, 3H), 7.20 (dd, *J* = 5.2, 3.5 Hz, 1H), 6.31 (s, 1H); <sup>13</sup>C NMR (125 MHz, CDCl<sub>3</sub>): δ 157.7, 136.1, 135.7, 134.4, 134.1, 132.8, 132.6, 130.2, 130.1, 130.1, 129.5, 128.8, 127.9, 127.6, 126.2, 118.1, 116.2, 110.3. HRMS (ESI) *m/z* calcd for C<sub>20</sub>H<sub>13</sub>N<sub>3</sub>OS [M+H]<sup>+</sup> 344.0852, found 344.0858.

#### 6-bromo-1,4-diphenylimidazo[1,5-a]quinazolin-5(4H)-one (3ba)

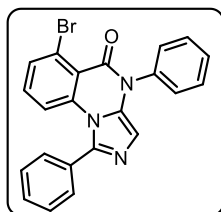

The title compound was prepared according to the general working procedure and purified by column chromatography (petroleum ether/ethyl acetate = 3:1) to give the product as a white solid. 94% yield, 117.4 mg. m.p. 242 - 244°C. <sup>1</sup>H NMR (500 MHz, CDCl<sub>3</sub>): δ 7.69 (d, *J* = 8.0 Hz, 1H), 7.58 (d, *J* = 6.6 Hz, 4H), 7.55 – 7.47 (m, 6H), 7.42 – 7.32 (m, 2H), 7.18 (t, *J* = 8.2 Hz, 1H), 6.23 (s, 1H). <sup>13</sup>C NMR (125 MHz, CDCl<sub>3</sub>): δ 156.2, 140.2, 138.0, 136.2, 133.6, 133.6, 133.2, 132.4, 130.1, 129.8, 129.4, 129.4, 129.1, 128.1, 125.4, 116.8, 116.0, 109.3. HRMS (ESI) *m/z* calcd for C<sub>22</sub>H<sub>14</sub>BrN<sub>3</sub>O [M+H]<sup>+</sup> 416.0393, found 416.0399.

#### 7-fluoro-1,4-diphenylimidazo[1,5-a]quinazolin-5(4H)-one (3ca)

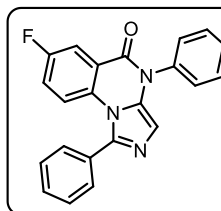

The title compound was prepared according to the general working procedure and purified by column chromatography (petroleum ether/ethyl acetate = 3:1) to give the product as a white solid. 89% yield, 94.9 mg. m.p. 222 - 223°C. <sup>1</sup>H NMR (500 MHz, CDCl<sub>3</sub>): δ 8.06 (d, *J* = 8.3 Hz, 1H), 7.66 – 7.43 (m, 10H), 7.28 (d, *J* = 14.3 Hz, 1H), 7.15 (d, *J* = 8.4 Hz, 1H), 6.30 (s, 1H). <sup>13</sup>C NMR (125 MHz, CDCl<sub>3</sub>): <sup>13</sup>C NMR (126 MHz, CDCl<sub>3</sub>) δ 159.9 (d, *J* = 248.3 Hz), 156.8, 139.8, 135.9, 133.7, 132.3, 130.1, 129.9, 129.6, 129.6, 129.2, 127.8, 121.3 (d, *J* = 23.6 Hz), 120.2, 120.2, 118.7 (d, *J* = 7.4 Hz), 116.1 (d, *J* = 24.5 Hz), 109.9. HRMS (ESI) *m/z* calcd for C<sub>22</sub>H<sub>14</sub>FN<sub>3</sub>O [M+H]<sup>+</sup> 356.1194, found 356.1189.

#### 7-chloro-1,4-diphenylimidazo[1,5-a]quinazolin-5(4H)-one (3da)

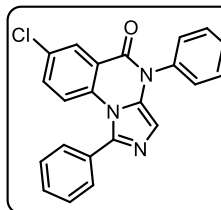

The title compound was prepared according to the general working procedure and purified by column chromatography (petroleum ether/ethyl acetate = 3:1) to give the product as a white solid. 86% yield, 95.9 mg. m.p. 226 - 227°C. <sup>1</sup>H NMR (500 MHz, CDCl<sub>3</sub>): δ 8.32 (s, 1H), 7.64 – 7.47 (m, 10H), 7.39 – 7.35 (m, 1H), 7.21 (d, *J* = 8.9 Hz, 1H), 6.28 (s, 1H); <sup>13</sup>C NMR (125 MHz, CDCl<sub>3</sub>): δ 156.7, 140.0, 135.9, 134.2, 133.8, 133.7, 132.1, 131.8, 130.2, 130.1, 129.7, 129.6, 129.6, 129.2, 127.8, 119.6, 118.2, 110.0. HRMS (ESI) *m/z* calcd for C<sub>22</sub>H<sub>14</sub>ClN<sub>3</sub>O [M+H]<sup>+</sup> 372.0898, found 372.0895.

#### 8-chloro-1,4-diphenylimidazo[1,5-a]quinazolin-5(4H)-one (3ea)



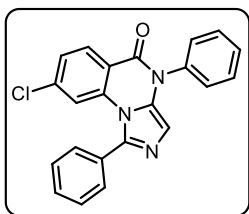

The title compound was prepared according to the general working procedure and purified by column chromatography (petroleum ether/ethyl acetate = 3:1) to give the product as a white solid. 84% yield, 93.1 mg. m.p. 210 - 212°C. <sup>1</sup>H NMR (500 MHz, CDCl<sub>3</sub>): δ 8.31 (d, *J* = 8.4 Hz, 1H), 7.63 - 7.53 (m, 8H), 7.51 - 7.48 (m, 2H), 7.34 (dd, *J* = 8.5, 2.0 Hz, 1H), 7.23 (d, *J* = 1.9 Hz, 1H), 6.28 (s, 1H); <sup>13</sup>C NMR (125 MHz, CDCl<sub>3</sub>): δ 157.1, 140.2, 136.4, 135.9, 134.0, 131.9, 131.6, 130.2, 130.2, 130.0, 129.6, 129.3, 127.9, 126.4, 116.9, 116.6, 115.5, 110.0. HRMS (ESI) *m/z* calcd for C<sub>22</sub>H<sub>14</sub>ClN<sub>3</sub>O [M+H]<sup>+</sup> 372.0898, found 372.0902.

#### 9-methyl-1,4-diphenylimidazo[1,5-a]quinazolin-5(4H)-one (3fa)

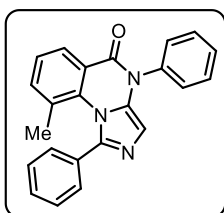

The title compound was prepared according to the general working procedure and purified by column chromatography (petroleum ether/ethyl acetate = 3:1) to give the product as a white solid. 75% yield, 79.1 mg. m.p. 203 - 205°C. <sup>1</sup>H NMR (500 MHz, CDCl<sub>3</sub>): δ 8.19 (d, *J* = 2.2 Hz, 1H), 7.66 - 7.57 (m, 4H), 7.52 (dt, *J* = 10.7, 7.3 Hz, 6H), 7.25 - 7.15 (m, 2H), 6.28 (s, 1H), 2.41 (s, 3H); <sup>13</sup>C NMR (125 MHz, CDCl<sub>3</sub>): δ 157.9, 139.8, 136.4, 136.0, 134.6, 133.9, 133.6, 132.6, 130.0, 130.0, 129.6, 129.6, 129.3, 128.9, 128.0, 117.9, 116.5, 109.7, 20.8. HRMS (ESI) *m/z* calcd for C<sub>23</sub>H<sub>17</sub>N<sub>3</sub>O [M+H]<sup>+</sup> 352.1444, found 352.1450.

#### 4-(4-methoxyphenyl)-1-phenylimidazo[1,5-a]quinazolin-5(4H)-one (3ga)

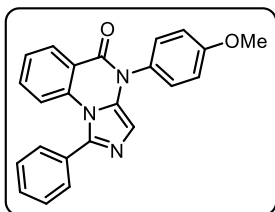

The title compound was prepared according to the general working procedure and purified by column chromatography (petroleum ether/ethyl acetate = 3:1) to give the product as a white solid. 96% yield, 105.8 mg. m.p. 233 - 234°C. <sup>1</sup>H NMR (500 MHz, CDCl<sub>3</sub>): δ 8.39 (dd, *J* = 7.6, 1.9 Hz, 1H), 7.65 - 7.60 (m, 2H), 7.53 (h, *J* = 6.4, 5.5 Hz, 3H), 7.44 - 7.37 (m, 4H), 7.28 (d, *J* = 10.2 Hz, 1H), 7.09 (d, *J* = 8.6 Hz, 2H), 6.30 (s, 1H), 3.89 (s, 3H). <sup>13</sup>C NMR (125 MHz, CDCl<sub>3</sub>): δ 160.0, 158.0, 140.0, 135.7, 134.3, 133.7, 132.5, 130.2, 129.8, 129.6, 129.0, 129.0, 128.7, 125.9, 118.2, 116.6, 115.3, 109.7, 55.6. HRMS (ESI) *m/z* calcd for C<sub>23</sub>H<sub>17</sub>N<sub>3</sub>O<sub>3</sub> [M+H]<sup>+</sup> 368.1394, found 368.1400.

#### 1-phenyl-4-(p-tolyl)imidazo[1,5-a]quinazolin-5(4H)-one (3ha)

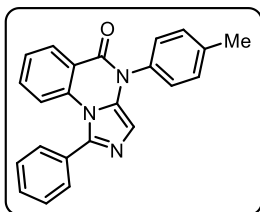

The title compound was prepared according to the general working procedure and purified by column chromatography (petroleum ether/ethyl acetate = 3:1) to give the product as a white solid. 90% yield, 94.9 mg. m.p. 243 - 244°C. <sup>1</sup>H NMR (500 MHz, CDCl<sub>3</sub>): δ 8.39 (dd, *J* = 7.7, 1.9 Hz, 1H), 7.68 - 7.59 (m, 2H), 7.52 (tt, *J* = 6.3, 3.1 Hz, 3H), 7.44 - 7.33 (m, 6H), 7.28 (d, *J* = 8.4 Hz, 1H), 6.30 (s, 1H), 2.46 (s, 3H); <sup>13</sup>C NMR (125 MHz, CDCl<sub>3</sub>): δ 157.8, 139.9, 139.4, 135.8, 134.2, 133.7, 133.6, 132.6, 130.7, 130.3, 129.8, 129.6, 129.0, 127.6, 125.9, 118.2, 116.6, 109.8, 21.4. HRMS (ESI) *m/z* calcd for C<sub>23</sub>H<sub>17</sub>N<sub>3</sub>O [M+H]<sup>+</sup> 352.1444, found 352.1448.

#### 4-(4-fluorophenyl)-1-phenylimidazo[1,5-a]quinazolin-5(4H)-one (3ia)

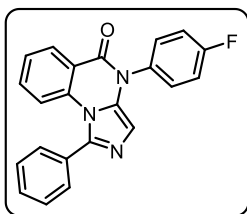

The title compound was prepared according to the general working procedure and purified by column chromatography (petroleum ether/ethyl acetate = 3:1) to give the product as a white solid. 92% yield, 98.1 mg. m.p. 216 - 217°C. <sup>1</sup>H NMR (500 MHz, CDCl<sub>3</sub>): δ 8.39 (dd, *J* = 7.7, 1.9 Hz, 1H), 7.67 – 7.60 (m, 2H), 7.59 – 7.47 (m, 5H), 7.47 – 7.38 (m, 2H), 7.33 – 7.27 (m, 3H), 6.29 (s, 1H). <sup>13</sup>C NMR (125 MHz, CDCl<sub>3</sub>): δ 163.5 (d, *J* = 250.4 Hz), 162.6, 157.7, 138.9, 135.9 (d, *J* = 57.0 Hz), 134.1, 133.9, 131.71 (d, *J* = 8.4 Hz), 130.4, 130.1, 129.5, 128.7, 127.9, 126.1, 118.2, 116.4 (d, *J* = 2.3 Hz), 116.2, 109.7. <sup>19</sup>F NMR (470 MHz, CDCl<sub>3</sub>) δ -111.2. HRMS (ESI) *m/z* calcd for C<sub>22</sub>H<sub>14</sub>FN<sub>3</sub>O [M+H]<sup>+</sup> 356.1194, found 356.1201.

#### 4-(4-chlorophenyl)-1-phenylimidazo[1,5-a]quinazolin-5(4H)-one (3ja)

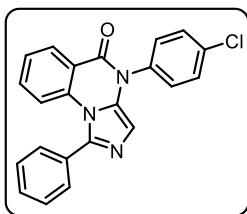

The title compound was prepared according to the general working procedure and purified by column chromatography (petroleum ether/ethyl acetate = 3:1) to give the product as a white solid. 89% yield, 99.3 mg. m.p. 226 - 227°C. <sup>1</sup>H NMR (500 MHz, CDCl<sub>3</sub>): δ 8.37 (dd, *J* = 7.7, 1.8 Hz, 1H), 7.64 – 7.59 (m, 2H), 7.59 – 7.52 (m, 5H), 7.47 – 7.39 (m, 4H), 7.28 (d, *J* = 8.1 Hz, 1H), 6.30 (s, 1H). <sup>13</sup>C NMR (125 MHz, CDCl<sub>3</sub>): <sup>13</sup>C NMR (126 MHz, CDCl<sub>3</sub>) δ 157.7, 140.3, 135.8, 135.3, 134.6, 134.0, 133.6, 132.4, 130.4, 130.3, 129.9, 129.6, 129.4, 129.1, 126.1, 117.9, 116.7, 109.7. HRMS (ESI) *m/z* calcd for C<sub>22</sub>H<sub>14</sub>ClN<sub>3</sub>O [M+H]<sup>+</sup> 372.0898, found 372.0904.

#### 1-phenyl-4-(*o*-tolyl)imidazo[1,5-a]quinazolin-5(4H)-one (3ka)

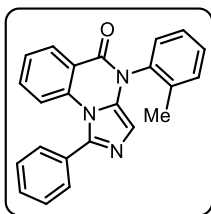

The title compound was prepared according to the general working procedure and purified by column chromatography (petroleum ether/ethyl acetate = 3:1) to give the product as a white solid. 81% yield, 85.4 mg. m.p. 206 - 208°C. <sup>1</sup>H NMR (500 MHz, CDCl<sub>3</sub>): δ 8.41 (d, *J* = 7.6 Hz, 1H), 7.65 (dd, *J* = 6.6, 2.8 Hz, 2H), 7.56 – 7.50 (m, 3H), 7.46 – 7.36 (m, 6H), 7.32 (d, *J* = 8.3 Hz, 1H), 6.16 (s, 1H), 2.25 (s, 3H). <sup>13</sup>C NMR (125 MHz, CDCl<sub>3</sub>): <sup>13</sup>C NMR (126 MHz, CDCl<sub>3</sub>) δ 157.3, 140.1, 136.2, 135.9, 135.1, 133.8, 133.4, 132.6, 131.7, 130.3, 129.8, 129.8, 129.7, 129.0, 128.2, 127.7, 125.9, 118.0, 116.6, 109.6, 17.5. HRMS (ESI) *m/z* calcd for C<sub>23</sub>H<sub>17</sub>N<sub>3</sub>O [M+H]<sup>+</sup> 352.1444, found 352.1449.

#### 5-oxo-1,4-diphenyl-4,5-dihydroimidazo[1,5-a]quinazoline-3-carbonitrile (4aa)

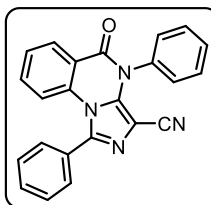

The title compound was prepared according to the general working procedure and purified by column chromatography (petroleum ether/ethyl acetate = 3:1) to give the product as a light yellow solid. 91% yield, 98.9 mg. m.p. 275 - 277°C. <sup>1</sup>H NMR (500 MHz, CDCl<sub>3</sub>): δ 8.46 – 8.37 (m, 1H), 7.68 – 7.55 (m, 8H), 7.53 – 7.46 (m, 4H), 7.27 (d, *J* = 6.6 Hz, 1H); <sup>13</sup>C NMR (125 MHz, CDCl<sub>3</sub>): <sup>13</sup>C NMR (126 MHz, CDCl<sub>3</sub>) δ 157.8, 141.0, 138.9, 135.0, 134.5, 134.4, 131.0, 130.9, 130.8, 130.5, 130.4, 129.6, 129.4, 128.9, 127.3, 117.9, 117.0, 112.4, 95.6. HRMS (ESI) *m/z* calcd for C<sub>23</sub>H<sub>14</sub>N<sub>4</sub>O [M+H]<sup>+</sup> 363.1240, found 362.1246.

#### 6-bromo-5-oxo-1,4-diphenyl-4,5-dihydroimidazo[1,5-a]quinazoline-3-carbonitrile (4ba)

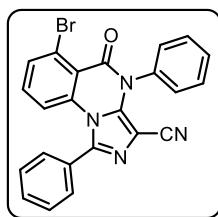

The title compound was prepared according to the general working procedure and purified by column chromatography (petroleum ether/ethyl acetate = 3:1) to give the product as a light yellow solid. 80% yield, 105.9 mg. m.p. 282 - 284°C. <sup>1</sup>H NMR (500 MHz, CDCl<sub>3</sub>): δ 7.81 – 7.77 (m, 1H), 7.65 (h, *J* = 2.7 Hz, 3H), 7.62 – 7.53 (m, 5H), 7.50 – 7.47 (m, 2H), 7.35 – 7.32 (m, 1H), 7.28 – 7.24 (m, 2H); <sup>13</sup>C NMR (125 MHz, CDCl<sub>3</sub>): δ 156.1, 141.1, 138.5, 137.2, 134.8, 134.3, 133.7, 131.0, 130.8, 130.3, 129.4, 129.4, 128.9, 127.7, 125.8, 117.1, 115.9, 112.2, 95.2. HRMS (ESI) *m/z* calcd for C<sub>23</sub>H<sub>13</sub>BrN<sub>4</sub>O [M+H]<sup>+</sup> 441.0346, found 441.0352.

#### 7-methoxy-5-oxo-1,4-diphenyl-4,5-dihydroimidazo[1,5-a]quinazoline-3-carbonitrile (4ca)

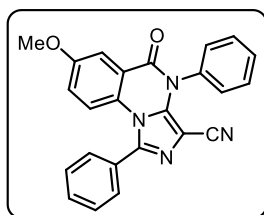

The title compound was prepared according to the general working procedure and purified by column chromatography (petroleum ether/ethyl acetate = 3:1) to give the product as a light yellow solid. 91% yield, 107.1 mg. m.p. 284 - 286°C. <sup>1</sup>H NMR (500 MHz, CDCl<sub>3</sub>): δ 7.80 (d, *J* = 3.1 Hz, 1H), 7.68 – 7.45 (m, 10H), 7.18 (d, *J* = 9.3 Hz, 1H), 7.04 (dd, *J* = 9.3, 3.1 Hz, 1H), 3.87 (s, 3H). <sup>13</sup>C NMR (125 MHz, CDCl<sub>3</sub>): <sup>13</sup>C NMR (126 MHz, CDCl<sub>3</sub>) δ 158.2, 157.8, 140.5, 138.4, 134.5, 131.0, 130.8, 130.8, 130.3, 129.6, 129.3, 128.9, 128.8, 122.6, 119.1, 118.6, 112.6, 111.6, 95.4, 77.4, 77.1, 76.9, 56.0. HRMS (ESI) *m/z* calcd for C<sub>24</sub>H<sub>16</sub>N<sub>4</sub>O<sub>2</sub> [M+H]<sup>+</sup> 393.1346, found 393.1352.

#### 7-methyl-5-oxo-1,4-diphenyl-4,5-dihydroimidazo[1,5-a]quinazoline-3-carbonitrile (4da)

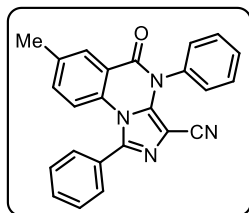

The title compound was prepared according to the general working procedure and purified by column chromatography (petroleum ether/ethyl acetate = 3:1) to give the product as a light yellow solid. 84% yield, 94.8 mg. m.p. 284 - 285°C. <sup>1</sup>H NMR (500 MHz, CDCl<sub>3</sub>): δ 8.18 (s, 1H), 7.66 – 7.59 (m, 5H), 7.56 (d, *J* = 7.2 Hz, 2H), 7.48 (dd, *J* = 6.3, 3.1 Hz, 2H), 7.30 (q, *J* = 11.3, 9.5 Hz, 2H), 7.14 (d, *J* = 8.7 Hz, 1H), 2.43 (s, 3H); <sup>13</sup>C NMR (125 MHz, CDCl<sub>3</sub>): δ 157.9, 140.8, 138.8, 137.7, 135.5, 134.5, 132.8, 130.9, 130.7, 130.3, 130.1, 129.6, 129.3, 128.9, 127.8, 117.6, 116.9, 112.60, 95.5, 20.9. HRMS (ESI) *m/z* calcd for C<sub>24</sub>H<sub>16</sub>N<sub>4</sub>O [M+H]<sup>+</sup> 377.1397, found 377.1403.

#### 7-fluoro-5-oxo-1,4-diphenyl-4,5-dihydroimidazo[1,5-a]quinazoline-3-carbonitrile (4ea)

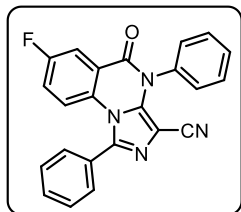

The title compound was prepared according to the general working procedure and purified by column chromatography (petroleum ether/ethyl acetate = 3:1) to give the product as a light yellow solid. 94% yield, 107.3 mg. m.p. 287 - 289°C. <sup>1</sup>H NMR (500 MHz, CDCl<sub>3</sub>): δ 8.07 (dd, *J* = 8.0, 3.0 Hz, 1H), 7.70 – 7.56 (m, 8H), 7.49 (dd, *J* = 6.6, 3.0 Hz, 2H), 7.27 – 7.16 (m, 2H). <sup>13</sup>C NMR (125 MHz, CDCl<sub>3</sub>): δ 160.5 (d, *J* = 251.0 Hz), 156.9, 156.9, 140.7, 138.4, 134.2, 131.4 (d, *J* = 2.7 Hz), 131.1, 131.0, 130.6, 130.4, 129.6, 129.5, 128.8, 122.2 (d, *J* = 23.8 Hz), 120.0 (d, *J* = 7.9 Hz), 119.3 (d, *J* = 7.6 Hz), 116.3 (d, *J* = 24.6 Hz), 112.2, 95.9. <sup>19</sup>F NMR (470 MHz, CDCl<sub>3</sub>) δ -111.3. HRMS (ESI) *m/z* calcd for C<sub>23</sub>H<sub>13</sub>FN<sub>4</sub>O [M+H]<sup>+</sup> 381.1146, found 381.1152.

#### 7-chloro-5-oxo-1,4-diphenyl-4,5-dihydroimidazo[1,5-a]quinazoline-3-carbonitrile (4fa)

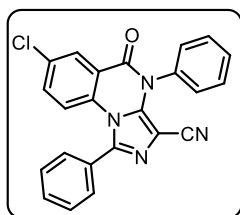

The title compound was prepared according to the general working procedure and purified by column chromatography (petroleum ether/ethyl acetate = 3:1) to give the product as a light yellow solid. 92% yield, 109.5 mg. m.p. 282 - 284°C. <sup>1</sup>H NMR (500 MHz, CDCl<sub>3</sub>): δ 8.36 (d, *J* = 2.6 Hz, 1H), 7.68 – 7.54 (m, 8H), 7.50 – 7.42 (m, 3H), 7.20 (d, *J* = 9.1 Hz, 1H). <sup>13</sup>C NMR (125 MHz, CDCl<sub>3</sub>): δ 156.8, 140.9, 138.5, 134.6, 134.2, 133.4, 133.4, 131.2, 131.0, 130.5, 130.4, 129.9, 129.6, 129.5, 128.8, 119.3, 118.5, 112.2, 96.0. HRMS (ESI) *m/z* calcd for C<sub>23</sub>H<sub>13</sub>ClN<sub>4</sub>O [M+H]<sup>+</sup> 397.0851, found 397.0856.

#### 9-methyl-5-oxo-1,4-diphenyl-4,5-dihydroimidazo[1,5-a]quinazoline-3-carbonitrile (4ga)

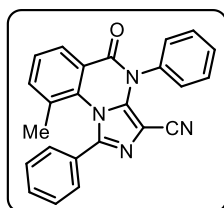

The title compound was prepared according to the general working procedure and purified by column chromatography (petroleum ether/ethyl acetate = 3:1) to give the product as a light yellow solid. 73% yield, 82.4 mg. m.p. 251 - 252°C. <sup>1</sup>H NMR (500 MHz, CDCl<sub>3</sub>): δ 8.24 (dd, *J* = 7.5, 1.8 Hz, 1H), 7.64 – 7.60 (m, 3H), 7.51 – 7.41 (m, 8H), 7.33 (dd, *J* = 9.0, 3.4 Hz, 1H), 1.73 (s, 3H). <sup>13</sup>C NMR (125 MHz, CDCl<sub>3</sub>): δ 158.4, 143.3, 139.7, 138.1, 134.2, 131.7, 130.8, 130.1, 129.9, 129.2, 129.0, 128.9, 128.3, 127.8, 127.7, 126.7, 121.1, 112.6, 96.1, 21.1. HRMS (ESI) *m/z* calcd for C<sub>24</sub>H<sub>16</sub>N<sub>4</sub>O [M+H]<sup>+</sup> 377.1397, found 377.1403.

#### 4-(4-methoxyphenyl)-5-oxo-1-phenyl-4,5-dihydroimidazo[1,5-a]quinazoline-3-carbonitrile (4ha)

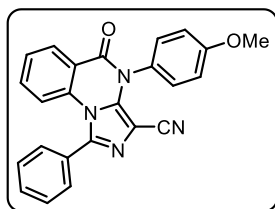

The title compound was prepared according to the general working procedure and purified by column chromatography (petroleum ether/ethyl acetate = 3:1) to give the product as a light yellow solid. 94% yield, 110.3 mg. m.p. 295 - 297°C. <sup>1</sup>H NMR (500 MHz, CDCl<sub>3</sub>): δ 8.42 (dd, *J* = 6.4, 3.3 Hz, 1H), 7.74 – 7.44 (m, 8H), 7.40 (d, *J* = 8.5 Hz, 2H), 7.13 (d, *J* = 8.4 Hz, 2H), 3.90 (s, 3H). <sup>13</sup>C NMR (125 MHz, CDCl<sub>3</sub>): δ 161.3, 158.1, 140.9, 139.4, 135.0, 134.4, 130.9, 130.7, 130.5, 129.9, 129.6, 129.3, 127.2, 126.9, 117.9, 116.9, 115.5, 112.6, 95.7, 55.6. HRMS (ESI) *m/z* calcd for C<sub>24</sub>H<sub>16</sub>N<sub>4</sub>O<sub>2</sub> [M+H]<sup>+</sup> 393.1346, found 393.1352.

#### 5-oxo-1-phenyl-4-(p-tolyl)-4,5-dihydroimidazo[1,5-a]quinazoline-3-carbonitrile (4ia)

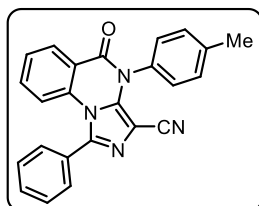

The title compound was prepared according to the general working procedure and purified by column chromatography (petroleum ether/ethyl acetate = 3:1) to give the product as a light yellow solid. 93% yield, 105.0 mg. m.p. 302 - 303°C. <sup>1</sup>H NMR (500 MHz, CDCl<sub>3</sub>): δ 8.47 – 8.38 (m, 1H), 7.67 – 7.54 (m, 5H), 7.52 – 7.43 (m, 4H), 7.39 – 7.35 (m, 2H), 7.30 – 7.27 (m, 1H), 2.50 (s, 3H). <sup>13</sup>C NMR (125 MHz, CDCl<sub>3</sub>): δ 157.9, 141.3, 140.9, 139.0, 134.9, 134.4, 131.7, 130.9, 130.9, 130.8, 130.5, 129.6, 129.3, 128.5, 127.2, 117.9, 116.9, 112.6, 95.6, 21.5. HRMS (ESI) *m/z* calcd for C<sub>24</sub>H<sub>16</sub>N<sub>4</sub>O [M+H]<sup>+</sup> 377.1397, found 377.1403.

#### 4-(4-fluorophenyl)-5-oxo-1-phenyl-4,5-dihydroimidazo[1,5-a]quinazoline-3-carbonitrile (4ja)

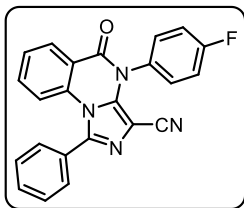

The title compound was prepared according to the general working procedure and purified by column chromatography (petroleum ether/ethyl acetate = 3:1) to give the product as a light yellow solid. 89% yield, 101.7 mg. m.p. 283 - 284°C. <sup>1</sup>H NMR (500 MHz, CDCl<sub>3</sub>): δ 8.43 – 8.38 (m, 1H), 7.66 – 7.56 (m, 5H), 7.53 – 7.46 (m, 4H), 7.36 – 7.31 (m, 2H), 7.28 (td, *J* = 3.3, 2.7, 1.5 Hz, 1H). <sup>13</sup>C NMR (125 MHz, CDCl<sub>3</sub>): δ 163.8 (d, *J* = 251.6 Hz), 157.9, 141.2, 138.9, 135.0, 134.7, 131.0, 130.9 (d, *J* = 7.1 Hz), 130.8, 130.4, 130.2 (d, *J* = 3.2 Hz), 129.5 (d, *J* = 25.7 Hz), 127.4, 117.7, 117.6, 117.4, 117.0, 112.5, 95.6. HRMS (ESI) *m/z* calcd for C<sub>23</sub>H<sub>13</sub>FN<sub>3</sub>O [M+H]<sup>+</sup> 381.1146, found 381.1152.

**4-(4-chlorophenyl)-5-oxo-1-phenyl-4,5-dihydroimidazo[1,5-a]quinazoline-3-carbonitrile (4ka)**

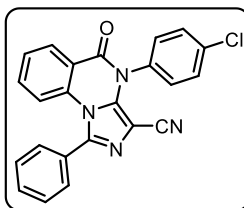

The title compound was prepared according to the general working procedure and purified by column chromatography (petroleum ether/ethyl acetate = 3:1) to give the product as a light yellow solid. 87% yield, 103.6 mg. m.p. 269 - 271°C. <sup>1</sup>H NMR (500 MHz, CDCl<sub>3</sub>): δ 8.46 – 8.38 (m, 1H), 7.65 – 7.56 (m, 7H), 7.54 – 7.49 (m, 2H), 7.46 – 7.42 (m, 2H), 7.31 – 7.27 (m, 1H). <sup>13</sup>C NMR (125 MHz, CDCl<sub>3</sub>): δ 157.7, 141.1, 138.5, 137.1, 135.0, 134.7, 1327, 130.9, 130.8, 130.6, 130.5, 130.3, 129.6, 129.4, 127.4, 117.7, 117.0, 112.5, 95.6. HRMS (ESI) *m/z* calcd for C<sub>23</sub>H<sub>13</sub>ClN<sub>4</sub>O [M+H]<sup>+</sup> 397.0851, found 397.0857.

**4-(4-bromophenyl)-5-oxo-1-phenyl-4,5-dihydroimidazo[1,5-a]quinazoline-3-carbonitrile (4la)**

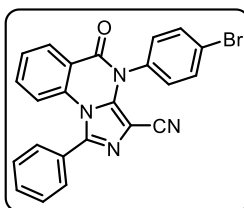

The title compound was prepared according to the general working procedure and purified by column chromatography (petroleum ether/ethyl acetate = 3:1) to give the product as a light yellow solid. 88% yield, 116.5 mg. m.p. 275 - 276°C. <sup>1</sup>H NMR (500 MHz, CDCl<sub>3</sub>): δ 8.40 – 8.30 (m, 1H), 7.62 – 7.47 (m, 7H), 7.44 (p, *J* = 6.0 Hz, 2H), 7.38 (d, *J* = 8.2 Hz, 2H), 7.21 (s, 1H). <sup>13</sup>C NMR (125 MHz, CDCl<sub>3</sub>): δ 156.7, 140.1, 137.5, 136.1, 133.9, 133.6, 131.6, 129.8, 129.7, 129.6, 129.4, 129.3, 128.5, 128.3, 126.4, 116.6, 115.9, 111.5, 94.6. HRMS (ESI) *m/z* calcd for C<sub>23</sub>H<sub>13</sub>BrN<sub>4</sub>O [M+H]<sup>+</sup> 441.0346, found 441.0352.

**5-oxo-1-phenyl-4-(*o*-tolyl)-4,5-dihydroimidazo[1,5-a]quinazoline-3-carbonitrile (4ma)**

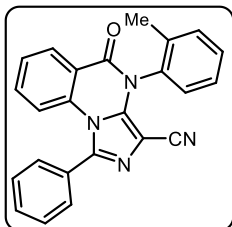

The title compound was prepared according to the general working procedure and purified by column chromatography (petroleum ether/ethyl acetate = 3:1) to give the product as a light yellow solid. 82% yield, 92.6 mg. m.p. 261 - 262°C. <sup>1</sup>H NMR (500 MHz, CDCl<sub>3</sub>): δ 8.47 – 8.36 (m, 1H), 7.65 – 7.43 (m, 10H), 7.36 (dd, *J* = 17.2, 7.7 Hz, 2H), 2.27 (s, 3H). <sup>13</sup>C NMR (125 MHz, CDCl<sub>3</sub>): δ 157.3, 141.1, 138.4, 137.0, 135.1, 134.6, 133.4, 131.7, 131.3, 130.8, 130.5, 129.6, 129.3, 128.9, 128.9, 128.3, 127.9, 127.8, 127.3, 117.7, 116.9, 112.2, 95.4, 17.4. HRMS (ESI) *m/z* calcd for C<sub>24</sub>H<sub>16</sub>N<sub>4</sub>O [M+H]<sup>+</sup> 377.1397, found 377.1403.

**1-(2-methoxyphenyl)-5-oxo-4-phenyl-4,5-dihydroimidazo[1,5-a]quinazoline-3-carbonitrile (4ab)**

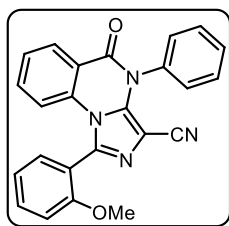

The title compound was prepared according to the general working procedure and purified by column chromatography (petroleum ether/ethyl acetate = 3:1) to give the product as a light yellow solid. 81% yield, 95.4 mg. m.p. 261 - 262°C. <sup>1</sup>H NMR (500 MHz, CDCl<sub>3</sub>): δ 8.40 (dd, *J* = 7.1, 2.3 Hz, 1H), 7.69 – 7.43 (m, 9H), 7.26 – 7.23 (m, 1H), 7.17 (t, *J* = 7.5 Hz, 1H), 7.04 (d, *J* = 8.3 Hz, 1H), 3.66 (s, 3H). <sup>13</sup>C NMR (125 MHz, CDCl<sub>3</sub>): δ 157.9, 138.6, 138.4, 135.5, 134.5, 134.5, 132.7, 131.8, 130.9, 130.3, 129.9, 127.1, 121.5, 120.8, 120.4, 117.5, 115.9, 112.6, 111.2, 110.5, 95.6, 55.5. HRMS (ESI) *m/z* calcd for C<sub>24</sub>H<sub>16</sub>N<sub>4</sub>O<sub>2</sub> [M+H]<sup>+</sup> 393.1346, found 393.1352.

**1-(2-chlorophenyl)-5-oxo-4-phenyl-4,5-dihydroimidazo[1,5-a]quinazoline-3-carbonitrile (4ac)**

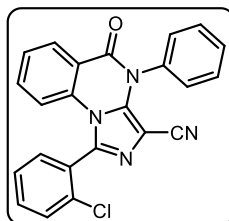

The title compound was prepared according to the general working procedure and purified by column chromatography (petroleum ether/ethyl acetate = 3:1) to give the product as a light yellow solid. 95% yield, 113.1 mg. m.p. 274 - 275°C. <sup>1</sup>H NMR (500 MHz, CDCl<sub>3</sub>): δ 8.49 – 8.39 (m, 1H), 7.69 – 7.47 (m, 11H), 7.07 – 7.00 (m, 1H). <sup>13</sup>C NMR (125 MHz, CDCl<sub>3</sub>): δ 157.7, 138.6, 137.7, 135.1, 135.0, 134.9, 134.4, 132.4, 132.3, 131.0, 130.7, 130.4, 130.3, 130.2, 129.1, 127.9, 127.4, 117.6, 115.5, 112.3, 95.8. HRMS (ESI) *m/z* calcd for C<sub>23</sub>H<sub>13</sub>ClN<sub>4</sub>O [M+H]<sup>+</sup> 397.0851, found 397.0857.

**1-(3-chlorophenyl)-5-oxo-4-phenyl-4,5-dihydroimidazo[1,5-a]quinazoline-3-carbonitrile (4ad)**

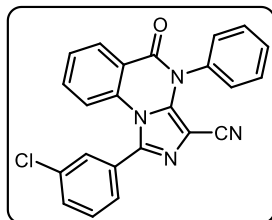

The title compound was prepared according to the general working procedure and purified by column chromatography (petroleum ether/ethyl acetate = 3:1) to give the product as a light yellow solid. 92% yield, 109.5 mg. m.p. 261 - 262°C. <sup>1</sup>H NMR (500 MHz, CDCl<sub>3</sub>): δ 8.45 – 8.37 (m, 1H), 7.68 – 7.59 (m, 6H), 7.56 (dd, *J* = 8.5, 6.3 Hz, 2H), 7.49 (dd, *J* = 5.9, 3.3 Hz, 3H), 7.31 – 7.26 (m, 1H). <sup>13</sup>C NMR (125 MHz, CDCl<sub>3</sub>): δ 157.8, 141.0, 138.9, 135.0, 134.5, 134.4, 131.0, 130.9, 130.8, 130.4, 130.3, 129.6, 129.3, 128.9, 127.8, 127.6, 127.3, 117.9, 117.0, 112.5, 95.6. HRMS (ESI) *m/z* calcd for C<sub>23</sub>H<sub>13</sub>ClN<sub>4</sub>O [M+H]<sup>+</sup> 397.0851, found 397.0857.

**1-(4-methoxyphenyl)-5-oxo-4-phenyl-4,5-dihydroimidazo[1,5-a]quinazoline-3-carbonitrile (4ae)**

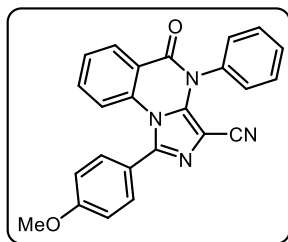

The title compound was prepared according to the general working procedure and purified by column chromatography (petroleum ether/ethyl acetate = 3:1) to give the product as a light yellow solid. 89% yield, 104.8 mg. m.p. 262 - 264°C. <sup>1</sup>H NMR (500 MHz, CDCl<sub>3</sub>): δ 8.41 (dd, *J* = 7.6, 2.0 Hz, 1H), 7.65 (h, *J* = 2.1 Hz, 3H), 7.57 – 7.42 (m, 6H), 7.34 (dd, *J* = 8.0, 1.4 Hz, 1H), 7.14 – 7.04 (m, 2H), 3.92 (s, 3H). <sup>13</sup>C NMR (125 MHz, CDCl<sub>3</sub>): δ 161.4, 157.8, 141.0, 138.8, 135.2, 134.5, 134.5, 131.1, 130.9, 130.4, 130.3, 128.9, 127.2, 122.9, 117.9, 116.9, 114.7, 112.5, 95.4, 55.5. HRMS (ESI) *m/z* calcd for C<sub>24</sub>H<sub>16</sub>N<sub>4</sub>O<sub>2</sub> [M+H]<sup>+</sup> 393.1346, found 393.1352.

**5-oxo-4-phenyl-1-(4-(trifluoromethyl)phenyl)-4,5-dihydroimidazo[1,5-a]quinazoline-3-carbonitrile (4af)**

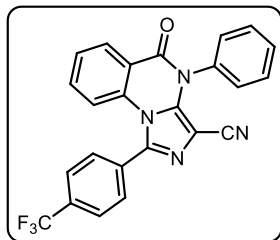

The title compound was prepared according to the general working procedure and purified by column chromatography (petroleum ether/ethyl acetate = 3:1) to give the product as a light yellow solid. 87% yield, 112.3 mg. m.p. 258 - 259°C. <sup>1</sup>H NMR (500 MHz, CDCl<sub>3</sub>): δ 8.44 (dd, *J* = 7.5, 2.1 Hz, 1H), 7.87 – 7.78 (m, 4H), 7.66 (dt, *J* = 4.5, 2.7 Hz, 3H), 7.58 – 7.47 (m, 4H), 7.28 (d, *J* = 1.5 Hz, 1H). <sup>13</sup>C NMR (125 MHz, CDCl<sub>3</sub>): δ 157.7, 138.4, 136.0, 135.4, 134.6, 133.9, 131.5 (q, *J* = 33.0 Hz), 130.5, 130.2, 129.9, 129.5, 128.7, 127.9, 127.1, 126.0 (q, *J* = 3.7 Hz), 123.8 (q, *J* = 272.4 Hz), 118.3, 116.5, 110.4. <sup>19</sup>F NMR (470 MHz, CDCl<sub>3</sub>) δ -62.8. HRMS (ESI) *m/z* calcd for C<sub>24</sub>H<sub>13</sub>F<sub>3</sub>N<sub>4</sub>O [M+H]<sup>+</sup> 431.1114, found 431.1116.

**1-(4-fluorophenyl)-5-oxo-4-phenyl-4,5-dihydroimidazo[1,5-a]quinazoline-3-carbonitrile (4ag)**

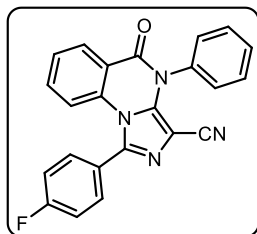

The title compound was prepared according to the general working procedure and purified by column chromatography (petroleum ether/ethyl acetate = 3:1) to give the product as a light yellow solid. 85% yield, 97.0 mg. m.p. 256 - 258°C. <sup>1</sup>H NMR (500 MHz, CDCl<sub>3</sub>): δ 8.42 (dd, *J* = 7.3, 2.2 Hz, 1H), 7.63 (ddd, *J* = 13.9, 5.8, 2.4 Hz, 5H), 7.56 – 7.47 (m, 4H), 7.29 – 7.25 (m, 3H).; <sup>13</sup>C NMR (125 MHz, CDCl<sub>3</sub>): δ 164.0 (d, *J* = 252.3 Hz), 157.7, 139.9, 138.9, 134.9, 134.6, 134.4, 131.8 (d, *J* = 8.6 Hz), 131.0, 130.6, 130.3, 128.9, 127.4, 127.0 (d, *J* = 3.6 Hz), 117.9, 116.7 (d, *J* = 1.6 Hz), 116.6, 112.3, 95.7. <sup>19</sup>F NMR (470 MHz, CDCl<sub>3</sub>) δ -108.2. HRMS (ESI) *m/z* calcd for C<sub>23</sub>H<sub>13</sub>FN<sub>4</sub>O [M+H]<sup>+</sup> 381.1146, found 381.1152.

**1-(4-chlorophenyl)-5-oxo-4-phenyl-4,5-dihydroimidazo[1,5-a]quinazoline-3-carbonitrile (4ah)**

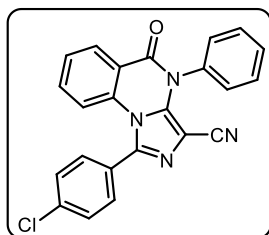

The title compound was prepared according to the general working procedure and purified by column chromatography (petroleum ether/ethyl acetate = 3:1) to give the product as a light yellow solid. 87% yield, 103.6 mg. m.p. 303 - 304°C. <sup>1</sup>H NMR (500 MHz, CDCl<sub>3</sub>): δ 8.43 (dd, *J* = 7.6, 2.0 Hz, 1H), 7.66 (p, *J* = 3.6, 3.1 Hz, 3H), 7.59 – 7.47 (m, 8H), 7.30 (dd, *J* = 8.2, 1.3 Hz, 1H). <sup>13</sup>C NMR (125 MHz, CDCl<sub>3</sub>): δ 157.7, 139.8, 139.0, 137.1, 134.8, 134.6, 134.3, 131.1, 130.9, 130.6, 130.4, 129.7, 129.3, 128.9, 127.5, 117.9, 116.8, 112.3, 95.9. HRMS (ESI) *m/z* calcd for C<sub>23</sub>H<sub>13</sub>ClN<sub>4</sub>O [M+H]<sup>+</sup> 397.0851, found 397.0857.

**5-oxo-4-phenyl-1-(thiophen-2-yl)-4,5-dihydroimidazo[1,5-a]quinazoline-3-carbonitrile (4ai)**

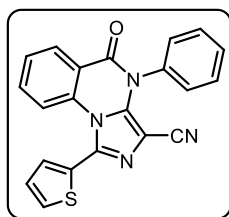

The title compound was prepared according to the general working procedure and purified by column chromatography (petroleum ether/ethyl acetate = 3:1) to give the product as a light yellow solid. 85% yield, 94.0 mg. m.p. 265 - 267°C. <sup>1</sup>H NMR (500 MHz, CDCl<sub>3</sub>): δ 8.44 (d, *J* = 7.9 Hz, 1H), 7.68 (t, *J* = 3.9 Hz, 3H), 7.65 – 7.40 (m, 6H), 7.36 (d, *J* = 8.5 Hz, 1H), 7.27 (d, *J* = 4.2 Hz, 1H). <sup>13</sup>C NMR (125 MHz, CDCl<sub>3</sub>): δ 157.8, 139.1, 134.9, 134.8, 134.3, 134.0, 131.1, 131.1, 130.5, 130.4, 130.4, 129.9, 128.9, 127.9, 127.5, 117.8, 116.6, 112.2, 96.0. HRMS (ESI) *m/z* calcd for C<sub>21</sub>H<sub>12</sub>N<sub>4</sub>OS [M+H]<sup>+</sup> 368.0732, found 368.0738.

#### 1-benzyl-5-oxo-4-phenyl-4,5-dihydroimidazo[1,5-a]quinazoline-3-carbonitrile (4aj)

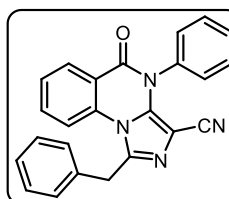

The title compound was prepared according to the general working procedure and purified by column chromatography (petroleum ether/ethyl acetate = 3:1) to give the product as a light yellow solid. 75% yield, 84.7 mg. m.p. 273 - 275°C. <sup>1</sup>H NMR (500 MHz, CDCl<sub>3</sub>): δ 8.43 (dd, *J* = 7.9, 1.6 Hz, 1H), 7.83 (d, *J* = 8.6 Hz, 1H), 7.72 – 7.43 (m, 7H), 7.36 (t, *J* = 7.5 Hz, 2H), 7.30 – 7.23 (m, 2H), 7.21 (s, 1H), 4.63 (s, 2H). <sup>13</sup>C NMR (125 MHz, CDCl<sub>3</sub>): δ 157.6, 140.2, 138.9, 135.0, 134.7, 134.7, 134.5, 130.9, 130.5, 130.3, 129.3, 128.9, 128.0, 127.5, 127.1, 117.7, 116.5, 112.5, 94.7, 37.4. HRMS (ESI) *m/z* calcd for C<sub>24</sub>H<sub>16</sub>N<sub>4</sub>O [M+H]<sup>+</sup> 377.1397, found 377.1403.

## Supporting Reference

- [S1] Priyanka Singh, Navpreet Kaur, and Prabal Banerjee. *J. Org. Chem.* **2020**, *85*, 3393–3406.
- [S2] Chiranjeevi Bingi, Kaushik Yadav Kola, Ashok Kala, Jagadeesh Babu Nanubolu, Krishnaiah Atmakur. *Tetrahedron Letters*, **2017**, *58*, 1071–1074.
- [S3] Wen Zhu Bi, Chen Qu, Xiao Lan Chen, Sheng Kai Wei, Ling Bo Qu, Shu Yun Liu, Kai Sun, Yu Fen Zhao. *Tetrahedron*, **2018**, *74*, 1908e1917
- [S4] Yang Yang, Haobing Wang and Haiyan Ma. *Chem. Asian J.* **2017**, *12*, 239–247.
- [S5] Céline Valant, Emeline Maillet, Jean-Jacques Bourguignon, Bernard Bucher, Valérie Utard, Jean-Luc Galzi, and Marcel Hibert. *Journal of Medicinal Chemistry*. **2009**, *52*, 5999–6011.
- [S6] K. Donthiboina, H. K. Namballa, S. P. Shaik, J. B. Nanubolu, N. Shankaraiah and A. Kamal. *Org. Biomol. Chem.*, 2018, **16**, 1720-1727.



# Copies of Product NMR Spectra

## 1,4-diphenylimidazo[1,5-a]quinazolin-5(4H)-one (3aa)

DCB-3aa.1.fid

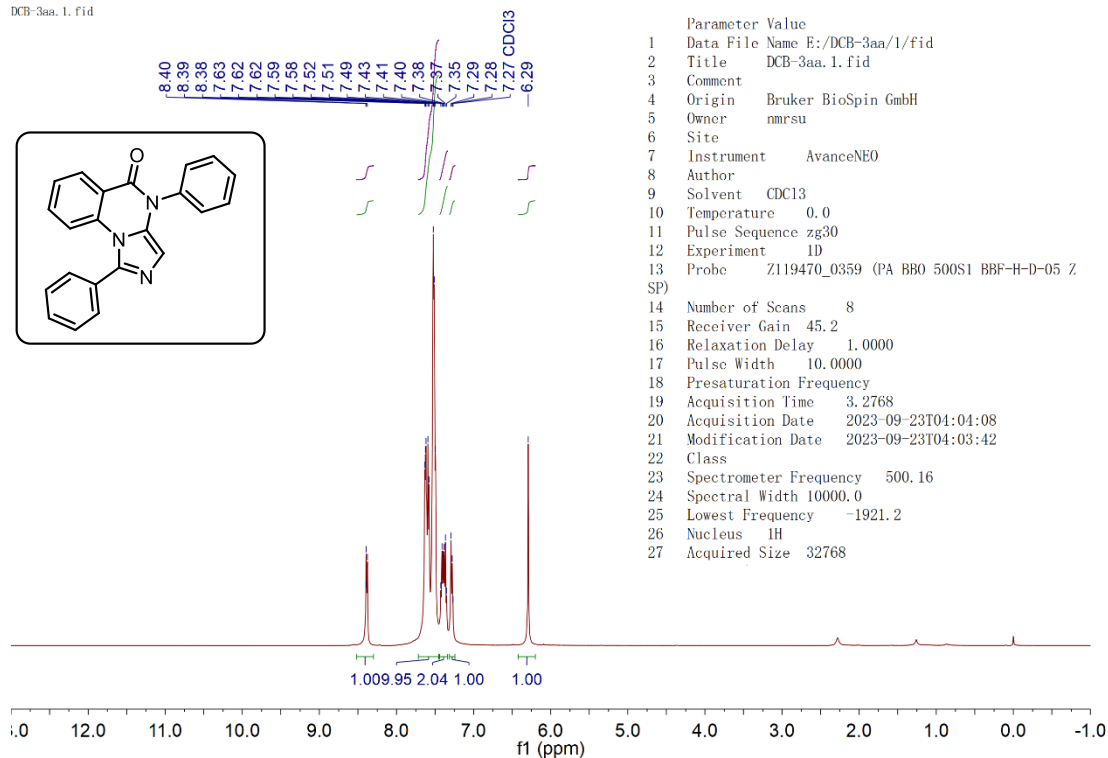

DCB-3aa.2.fid

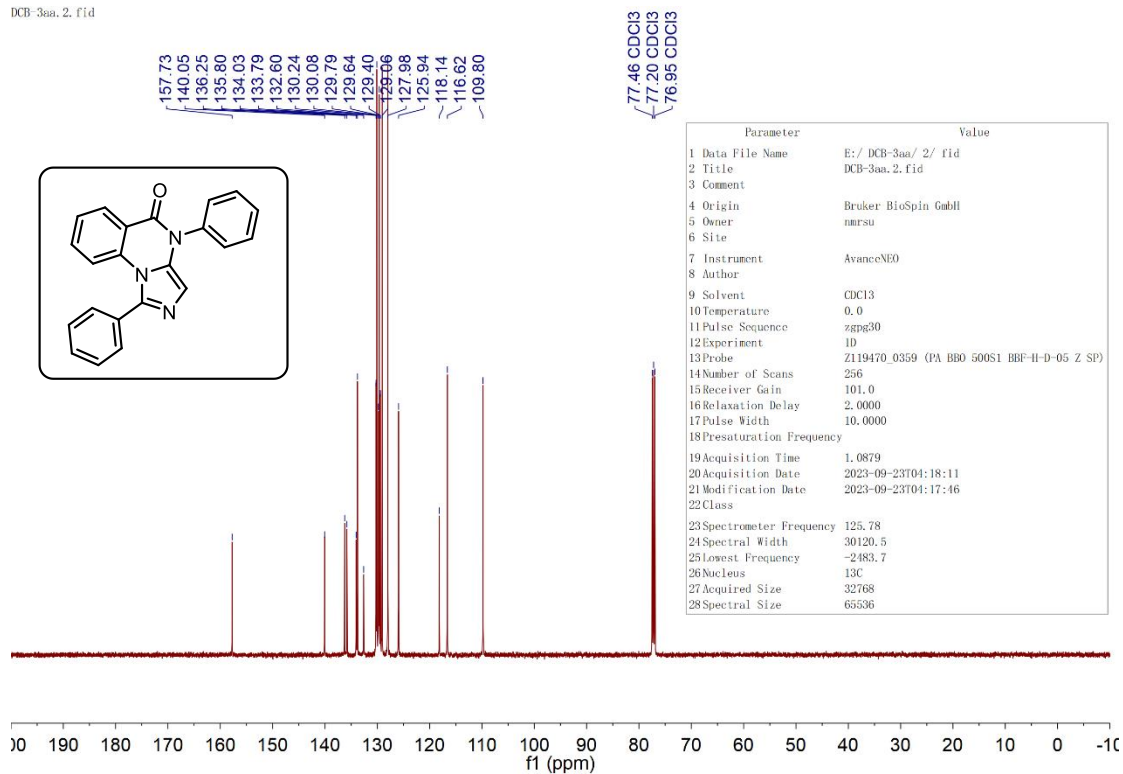

# 1-(2-chlorophenyl)-4-phenylimidazo[1,5-a]quinazolin-5(4H)-one (3ab)

DCB-A-2Cl.1.fid

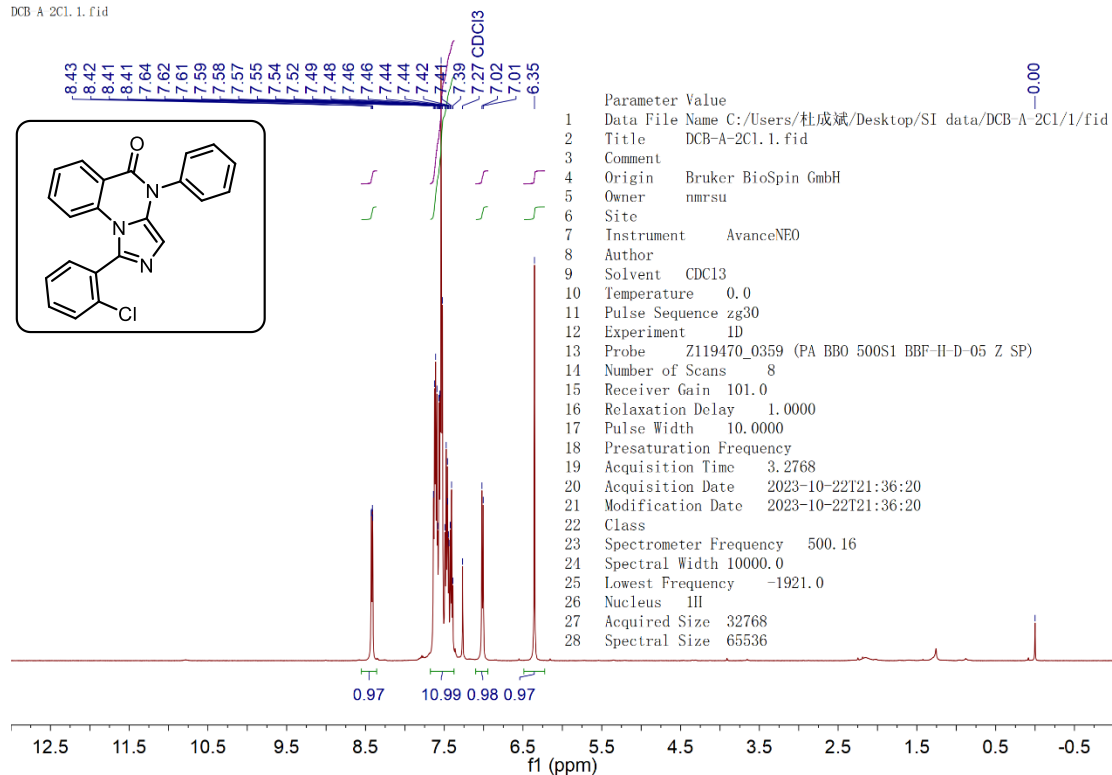

DCB-A-2Cl.2.fid

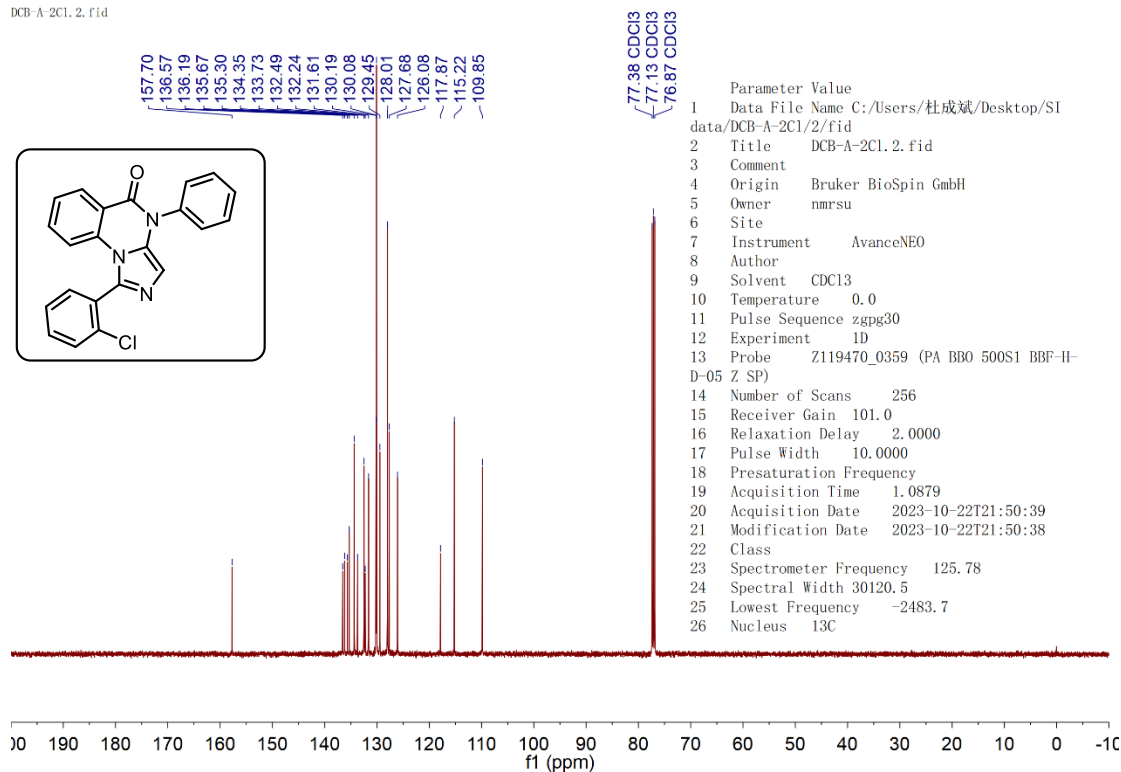

# 1-(2-bromophenyl)-4-phenylimidazo[1,5-a]quinazolin-5(4H)-one (3ac)

DCB-A-2Br. 1. fid

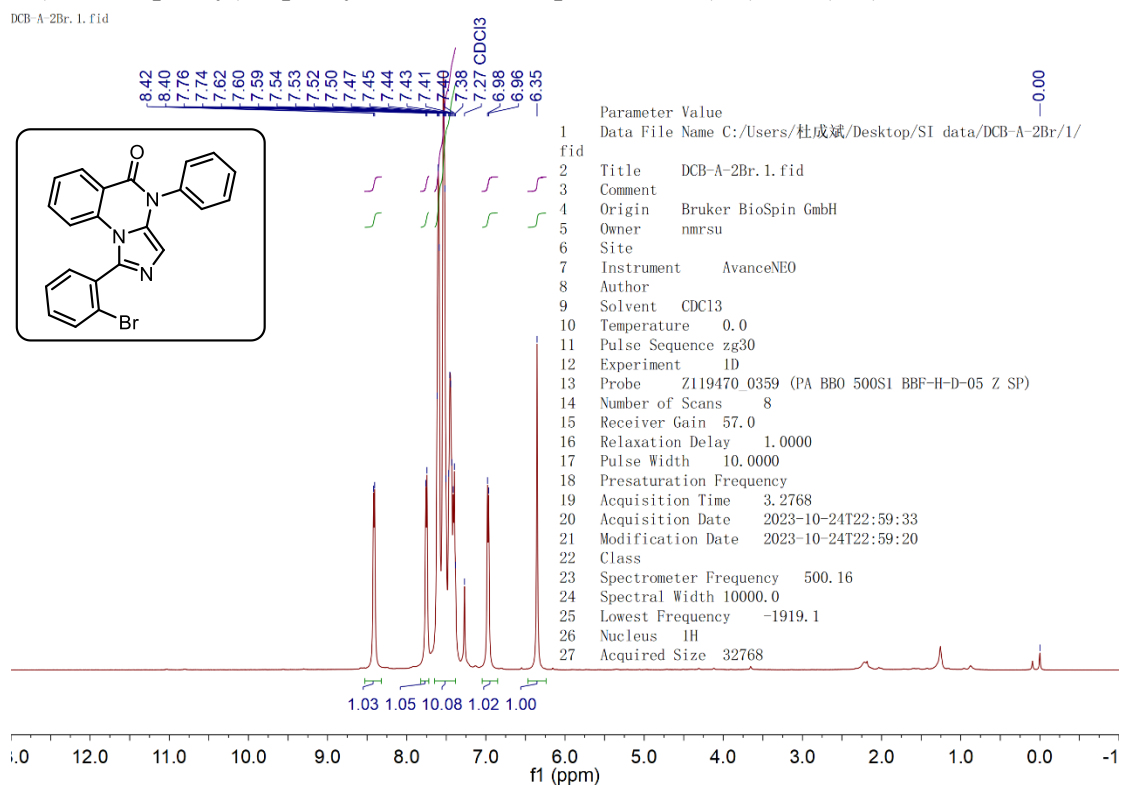

DCB-A-2Br. 2. fid

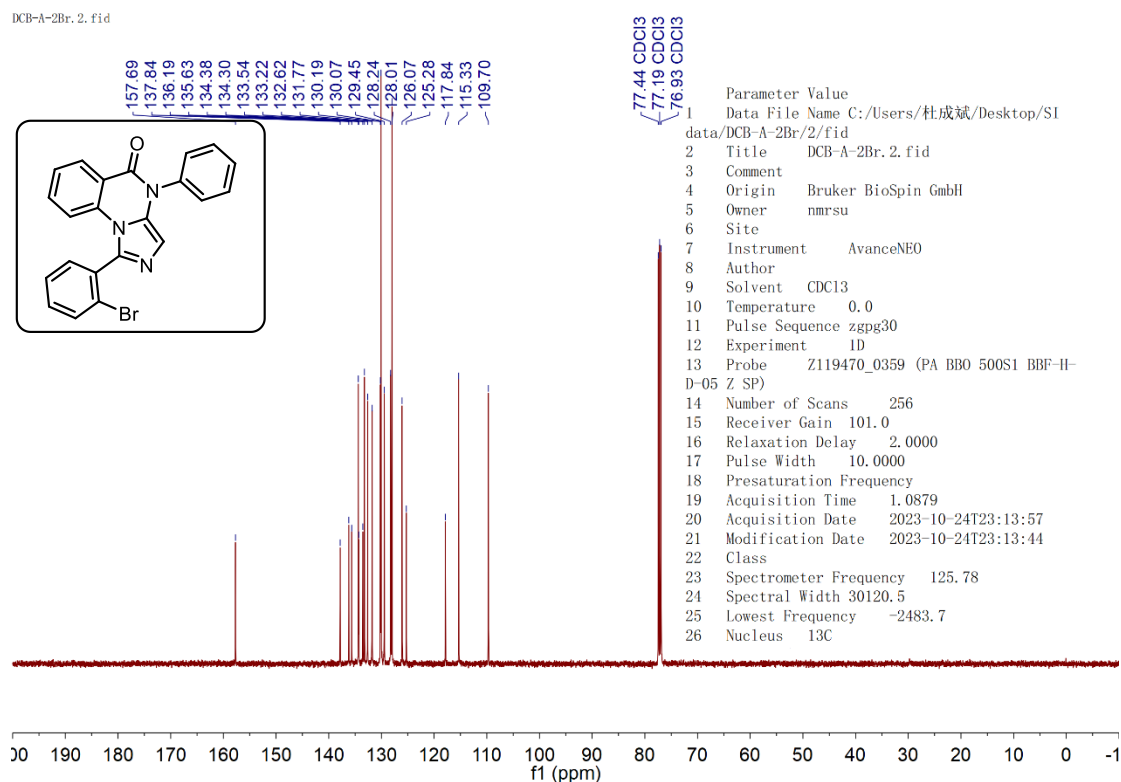

# 1-(3-fluorophenyl)-4-phenylimidazo[1,5-a]quinazolin-5(4H)-one (3ad)

DCB-A-3F. 1. fid

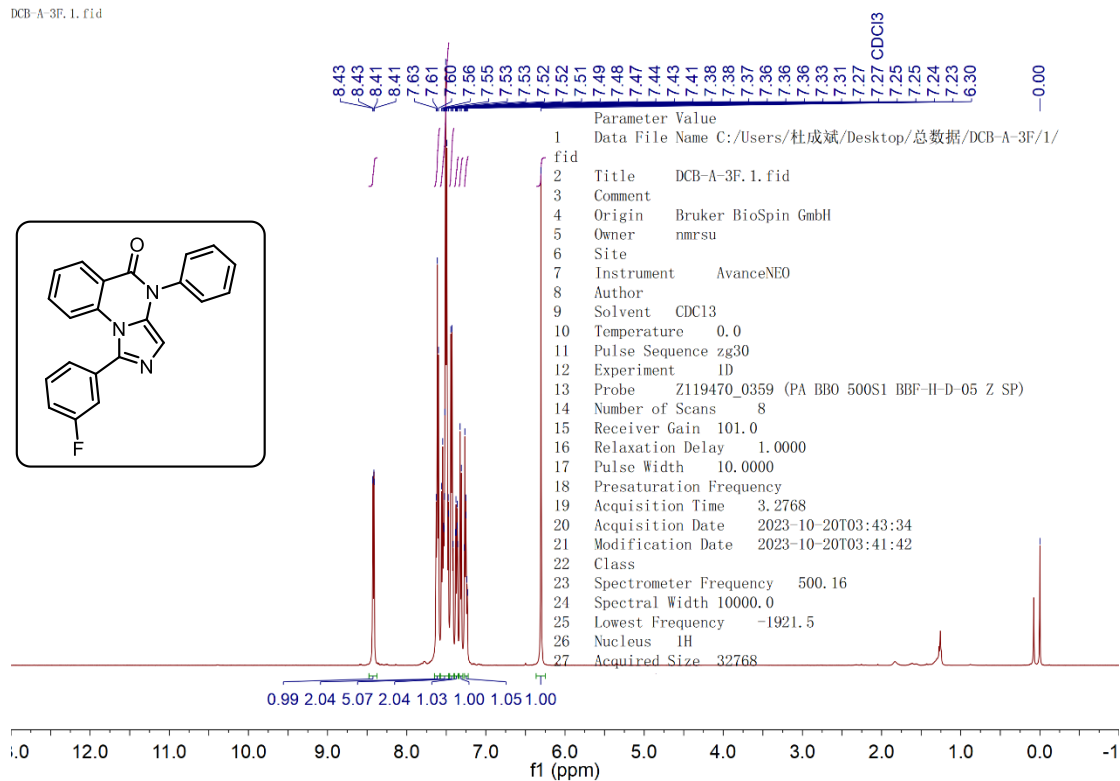

DCB-A-3F. 2. fid

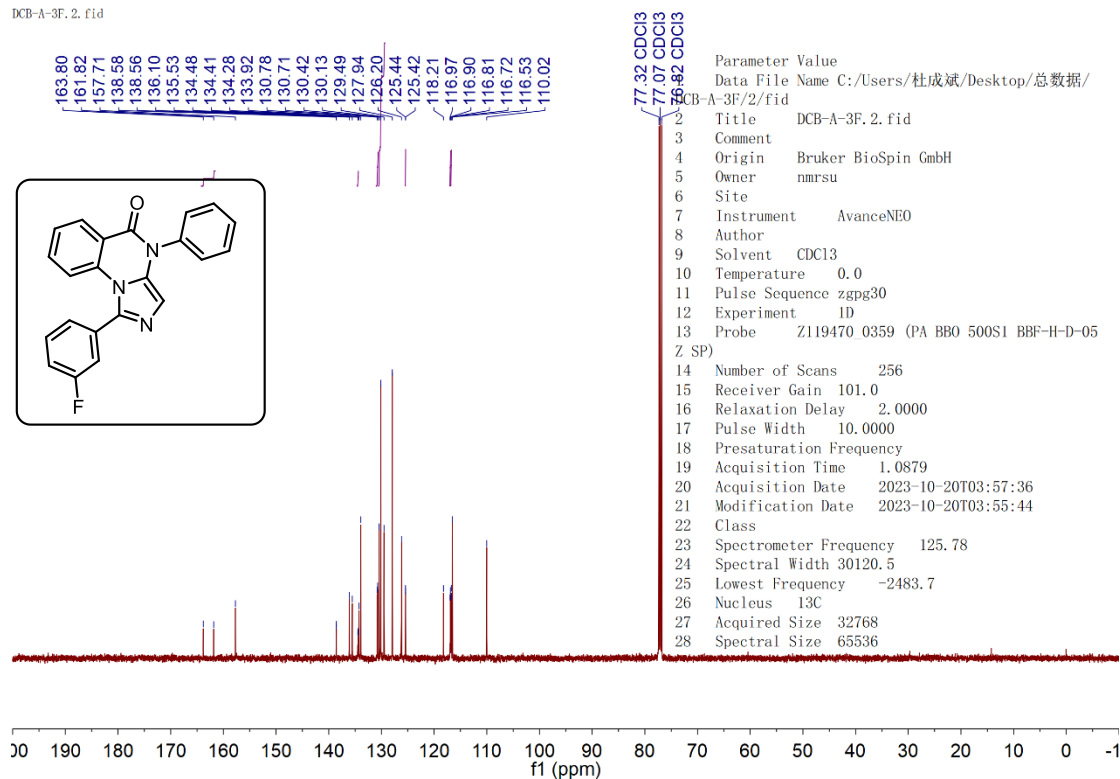

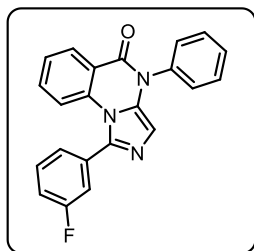

-111.23

| Parameter                  | Value                                       |
|----------------------------|---------------------------------------------|
| 1 Data File Name           | C:/Users/杜成斌/Desktop/总数据/DCB-A-3F/3/fid     |
| 2 Title                    | DCB-A-3F.3.fid                              |
| 3 Comment                  |                                             |
| 4 Origin                   | Bruker BioSpin GmbH                         |
| 5 Owner                    | nmrsu                                       |
| 6 Site                     |                                             |
| 7 Instrument               | AvanceNEO                                   |
| 8 Author                   |                                             |
| 9 Solvent                  | CDCl3                                       |
| 10 Temperature             | 0.0                                         |
| 11 Pulse Sequence          | zgig                                        |
| 12 Experiment              | 1D                                          |
| 13 Probe                   | Z119470_0359 (PA BBO 500S1 BBF-H-D-05 Z SP) |
| 14 Number of Scans         | 16                                          |
| 15 Receiver Gain           | 101.0                                       |
| 16 Relaxation Delay        | 1.0000                                      |
| 17 Pulse Width             | 15.0000                                     |
| 18 Presaturation Frequency |                                             |
| 19 Acquisition Time        | 0.5767                                      |
| 20 Acquisition Date        | 2023-10-20T03:59:14                         |
| 21 Modification Date       | 2023-10-20T03:57:22                         |
| 22 Class                   |                                             |
| 23 Spectrometer Frequency  | 470.57                                      |
| 24 Spectral Width          | 113636.4                                    |
| 25 Lowest Frequency        | -103880.2                                   |
| 26 Nucleus                 | <sup>19</sup> F                             |
| 27 Acquired Size           | 65536                                       |
| 28 Spectral Size           | 131072                                      |

:0 10 0 -10 -20 -30 -40 -50 -60 -70 -80 -90 -100 -110 -120 -130 -140 -150 -160 -170 -180 -190 -200 -210 -220  
f1 (ppm)

# 4-phenyl-1-(4-(trifluoromethyl)phenyl)imidazo[1,5-a]quinazolin-5(4H)-one (3ae)

DCB-A-4CF3.1.fid

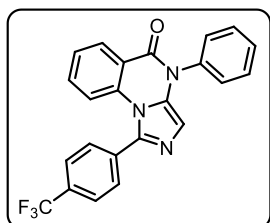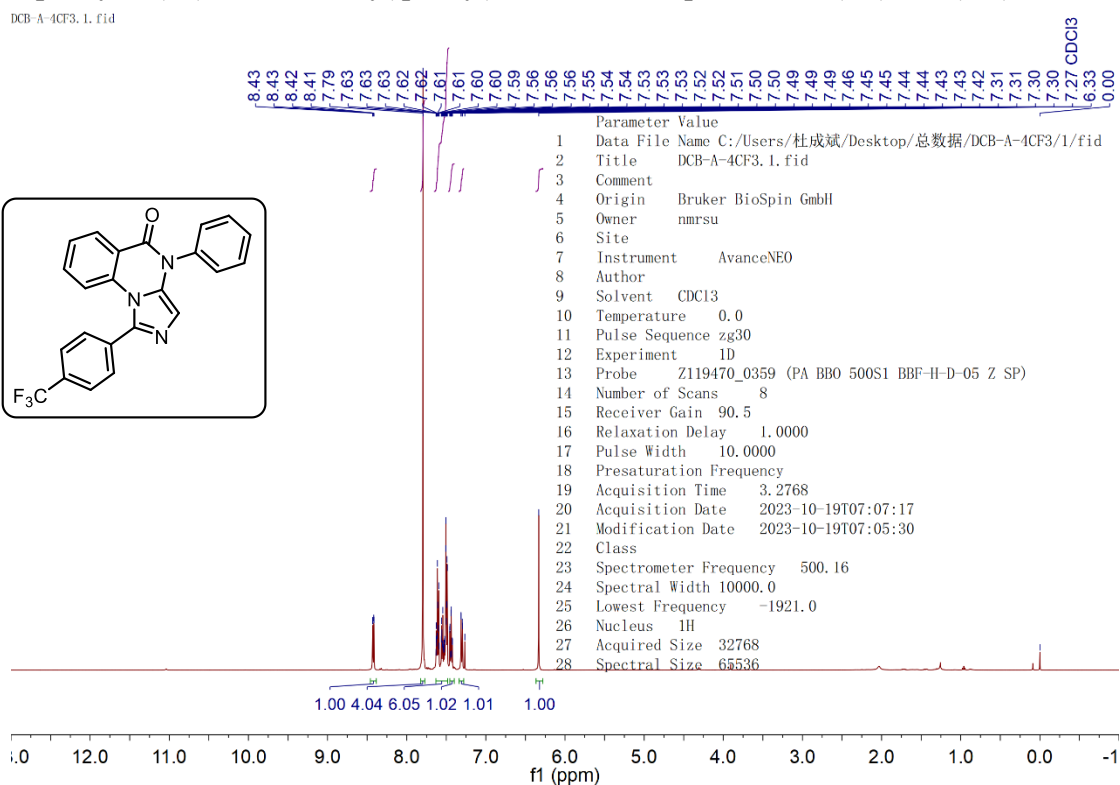

DCB-A-4CF3.2.fid

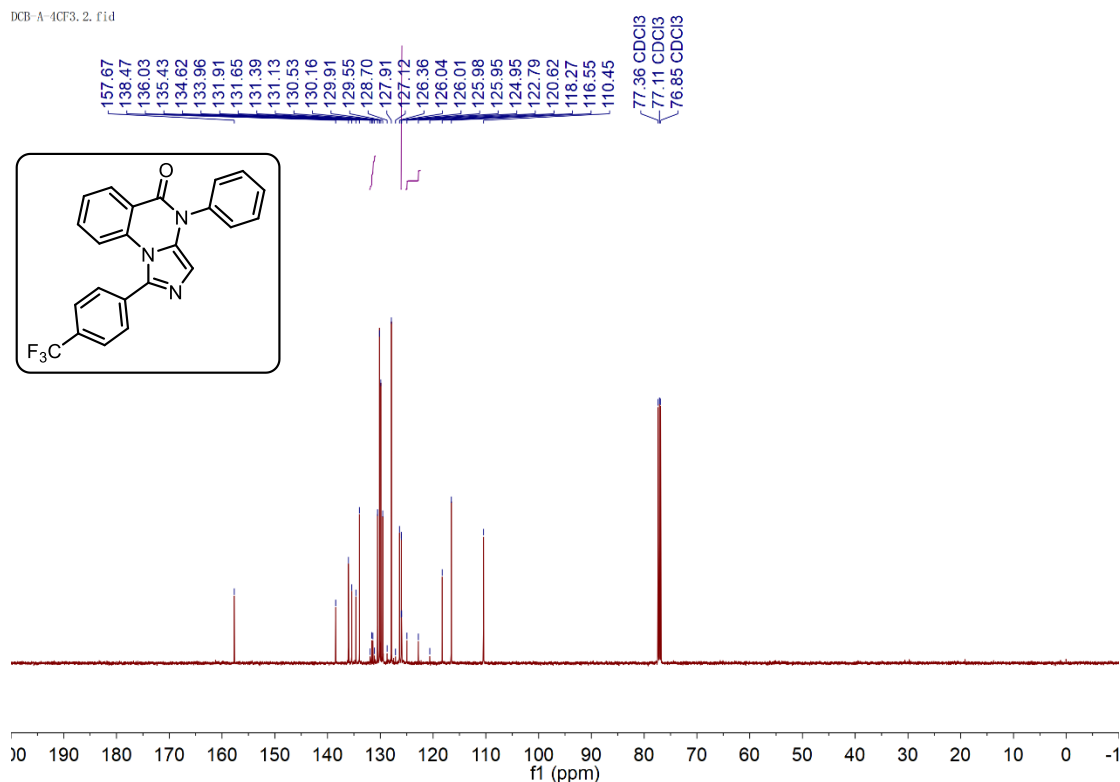

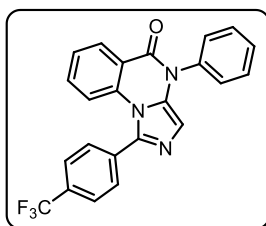

Parameter Value  
1 Data File Name C:/Users/杜成斌/Desktop/总数据/DCB-A-4CF3/3/fid  
2 Title DCB-A-4CF3.3.fid  
3 Comment  
4 Origin Bruker BioSpin GmbH  
5 Owner nmrsu  
6 Site  
7 Instrument AvanceNEO  
8 Author  
9 Solvent CDCl3  
10 Temperature 0.0  
11 Pulse Sequence zgig  
12 Experiment 1D  
13 Probe Z119470\_0359 (PA BBO 500S1 BBF-H-D-05 Z SP)  
14 Number of Scans 16  
15 Receiver Gain 101.0  
16 Relaxation Delay 1.0000  
17 Pulse Width 15.0000  
18 Presaturation Frequency  
19 Acquisition Time 0.5767  
20 Acquisition Date 2023-10-19T07:23:05  
21 Modification Date 2023-10-19T07:21:18  
22 Class  
23 Spectrometer Frequency 470.57  
24 Spectral Width 113636.4  
25 Lowest Frequency -103880.2  
26 Nucleus 19F  
27 Acquired Size 65536

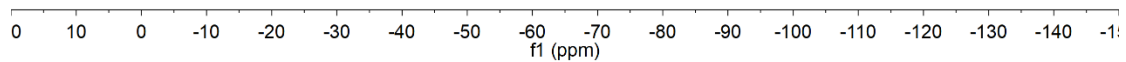

# 1-(4-methoxyphenyl)-4-phenylimidazo[1,5-a]quinazolin-5(4H)-one (3af)

DCB-A-40Me.1.fid

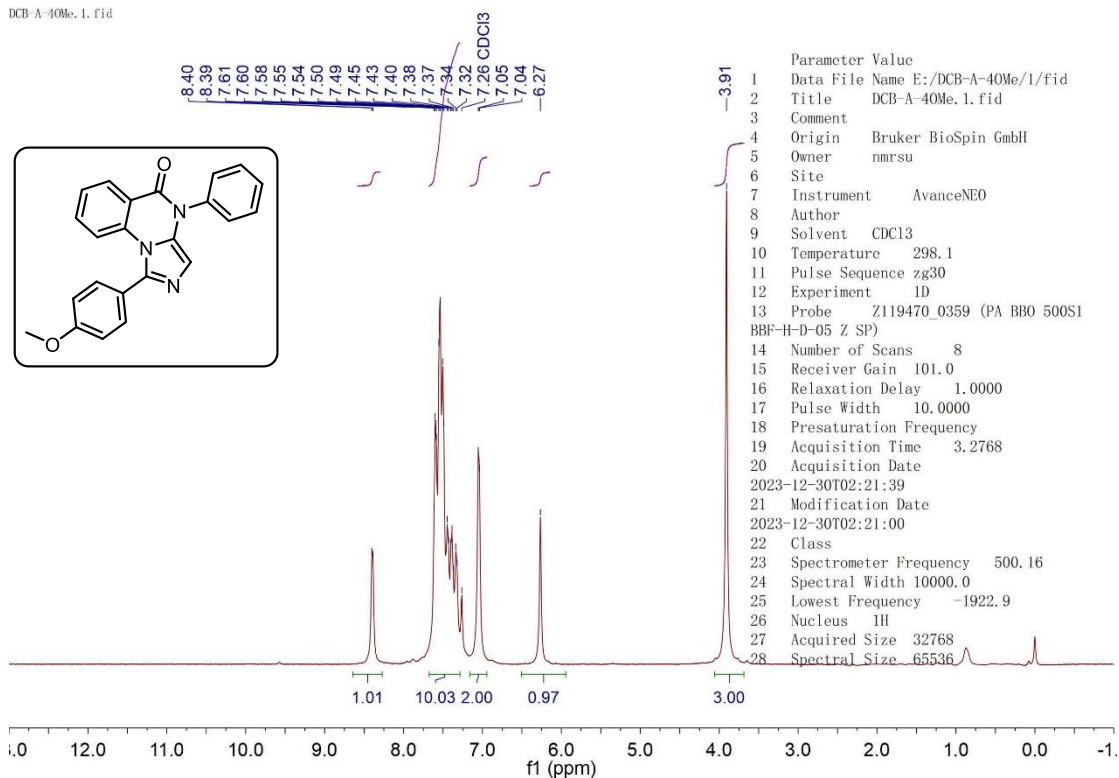

DCB-A-40Me.2.fid

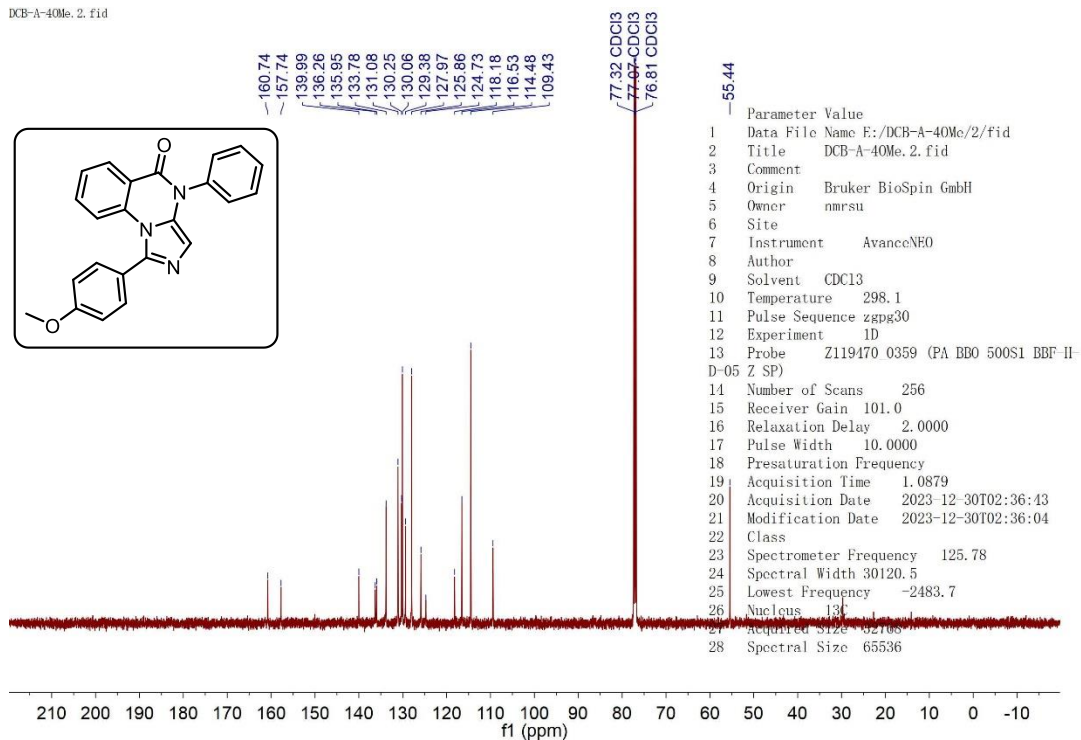



# 4-phenyl-1-(p-tolyl)imidazo[1,5-a]quinazolin-5(4H)-one (3ag)

DCB-A-4Me.1.fid

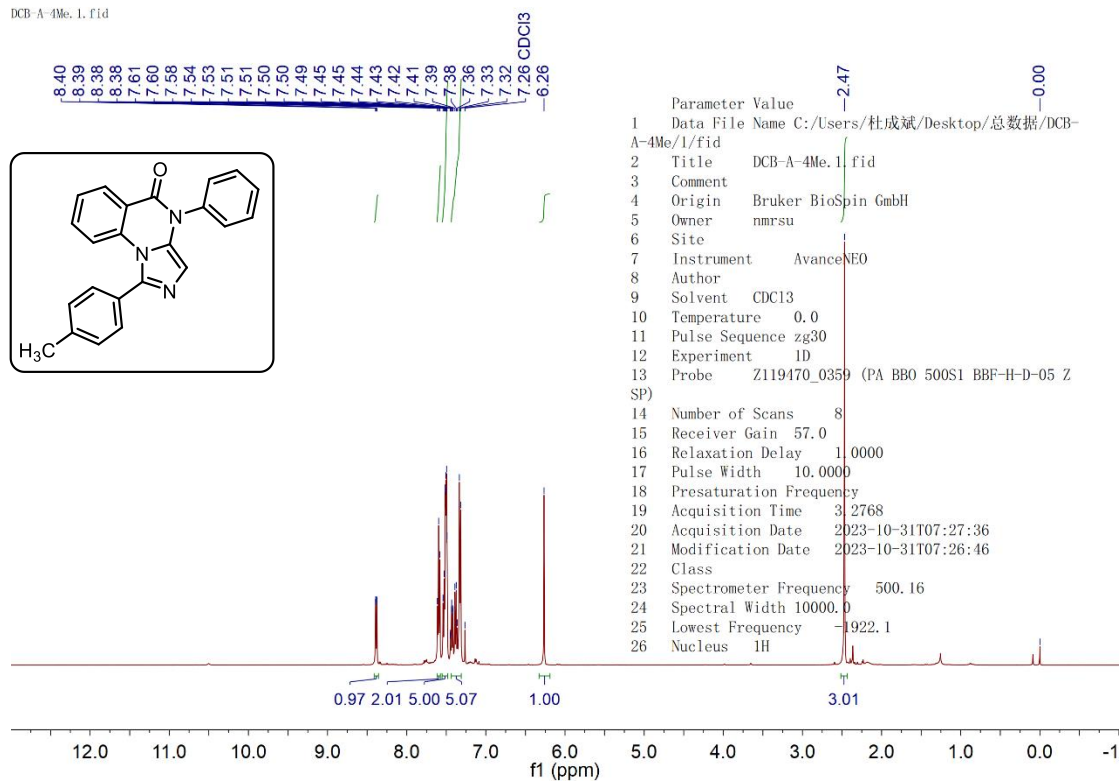

DCB-A-4Me.2.fid

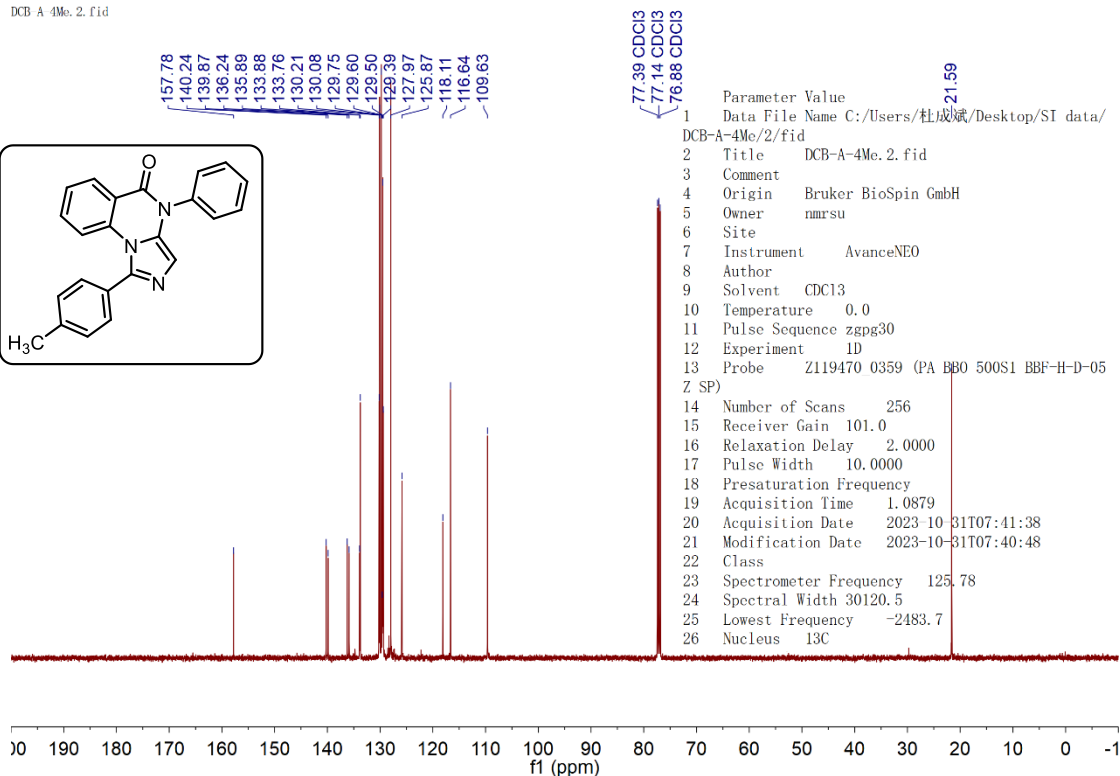

# 1-(4-fluorophenyl)-4-phenylimidazo[1,5-a]quinazolin-5(4H)-one (3ah)

DCB-A-4F.1.fid

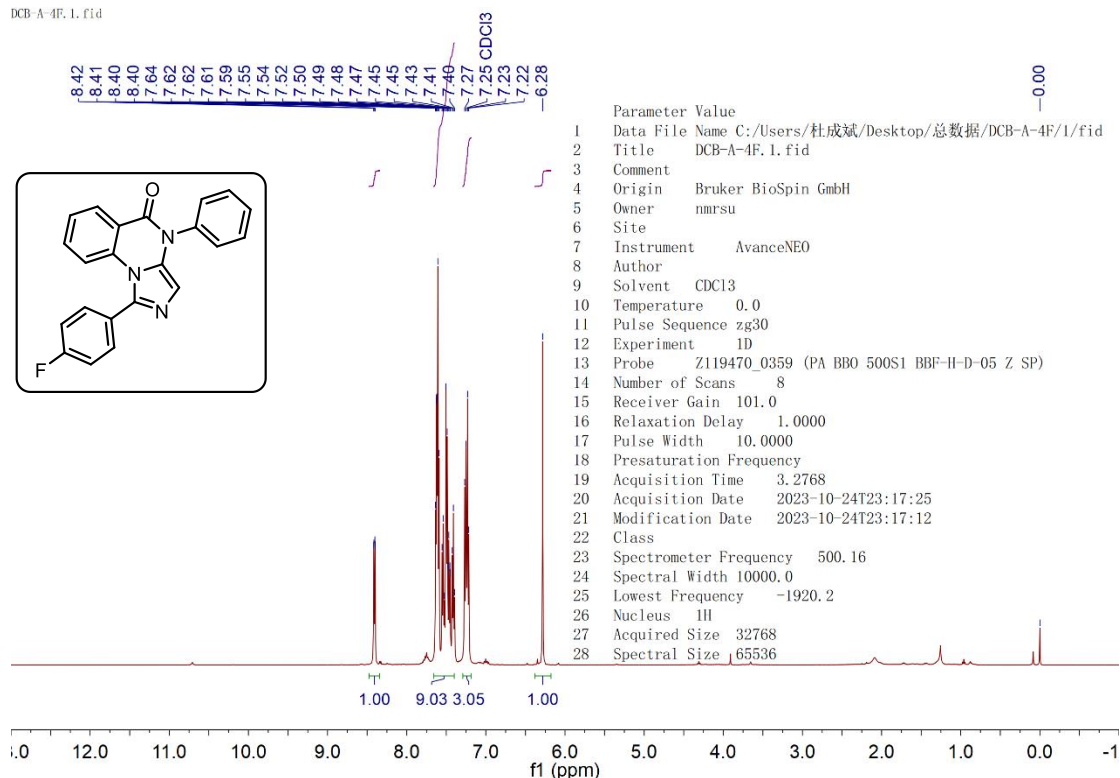

DCB-A-4F.2.fid

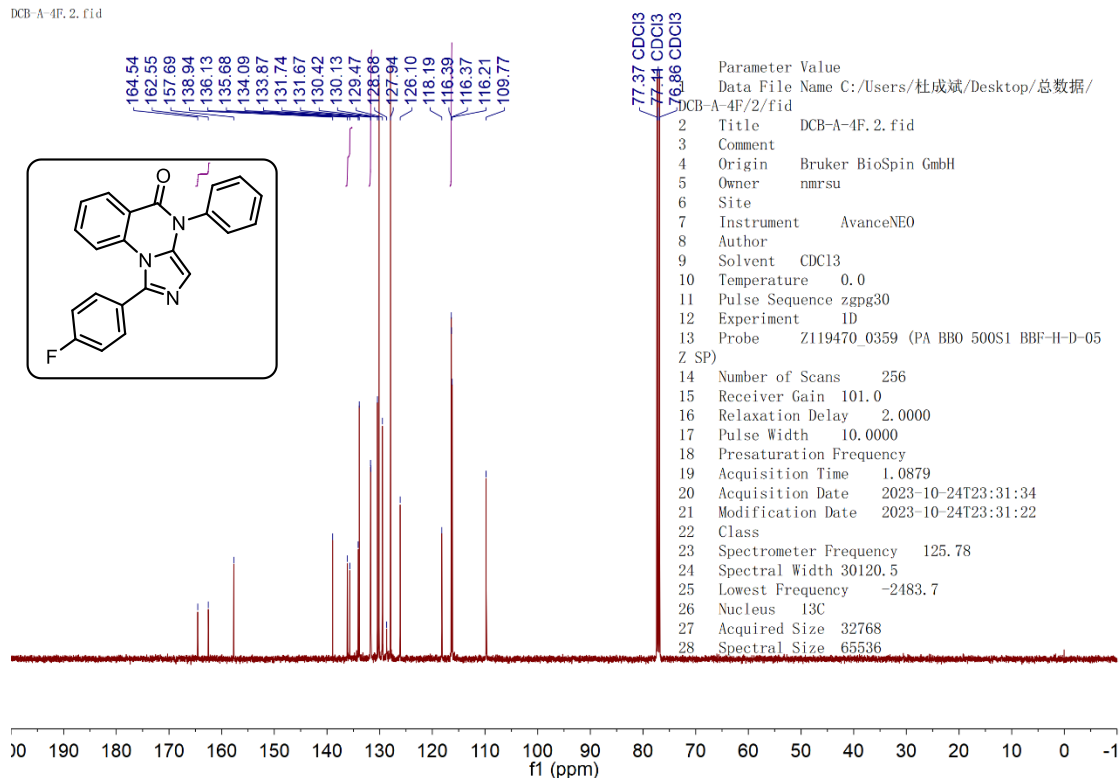

DCB-A-4F.3.fid

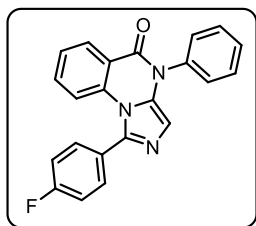

--110.25

```
Parameter Value
1 Data File Name C:/Users/杜成斌/Desktop/总数据/DCB-
A-4F/3/fid
2 Title DCB-A-4F.3.fid
3 Comment
4 Origin Bruker BioSpin GmbH
5 Owner nmrsu
6 Site
7 Instrument AvanceNEO
8 Author
9 Solvent CDCl3
10 Temperature 0.0
11 Pulse Sequence zgig
12 Experiment 1D
13 Probe Z119470_0359 (PA BBO 500S1 BBF-H-D-05 Z SP)
14 Number of Scans 16
15 Receiver Gain 101.0
16 Relaxation Delay 1.0000
17 Pulse Width 15.0000
18 Presaturation Frequency
19 Acquisition Time 0.5767
20 Acquisition Date 2023-10-24T23:33:21
21 Modification Date 2023-10-24T23:33:08
22 Class
23 Spectrometer Frequency 470.57
24 Spectral Width 113636.4
25 Lowest Frequency -103880.2
26 Nucleus 19F
27 Acquired Size 65536
28 Spectral Size 131072
```

10 0 -10 -20 -30 -40 -50 -60 -70 -80 -90 -100 -110 -120 -130 -140 -150 -160 -170 -180 -190 -200 -210 -220  
f1 (ppm)

# 1-(4-chlorophenyl)-4-phenylimidazo[1,5-a]quinazolin-5(4H)-one (3ai)

DCB230629-A-4-Cl.1.fid

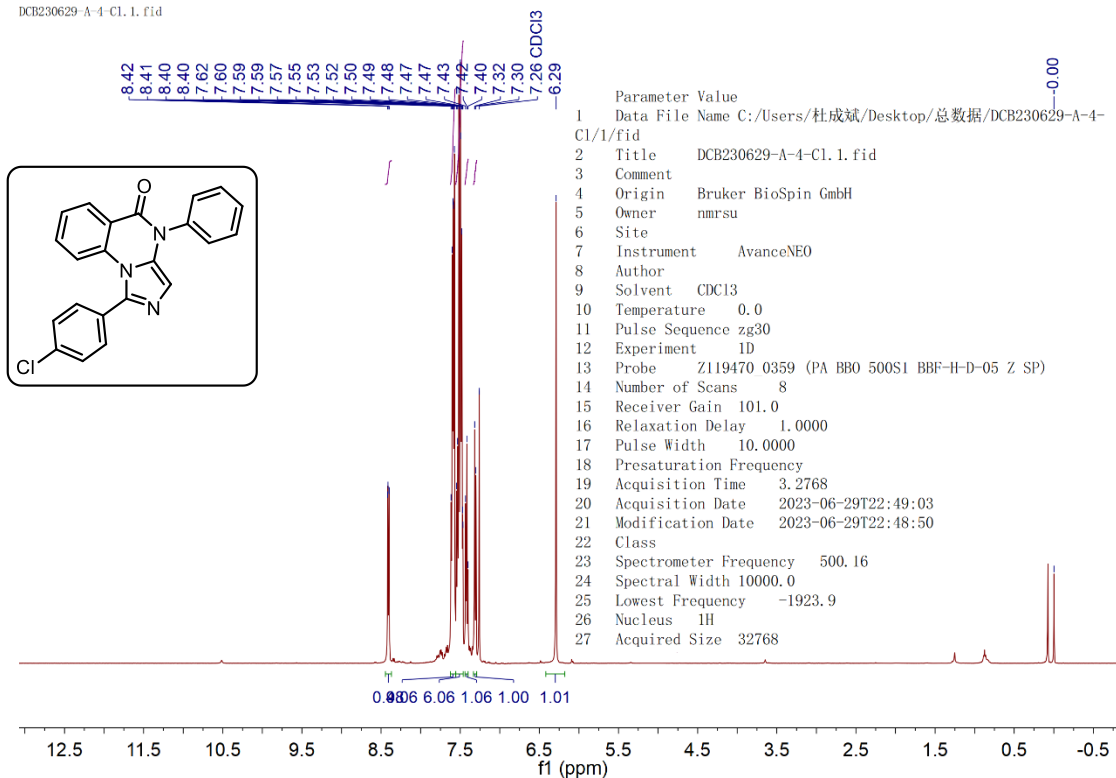

DCB230629-A-4-Cl.2.fid

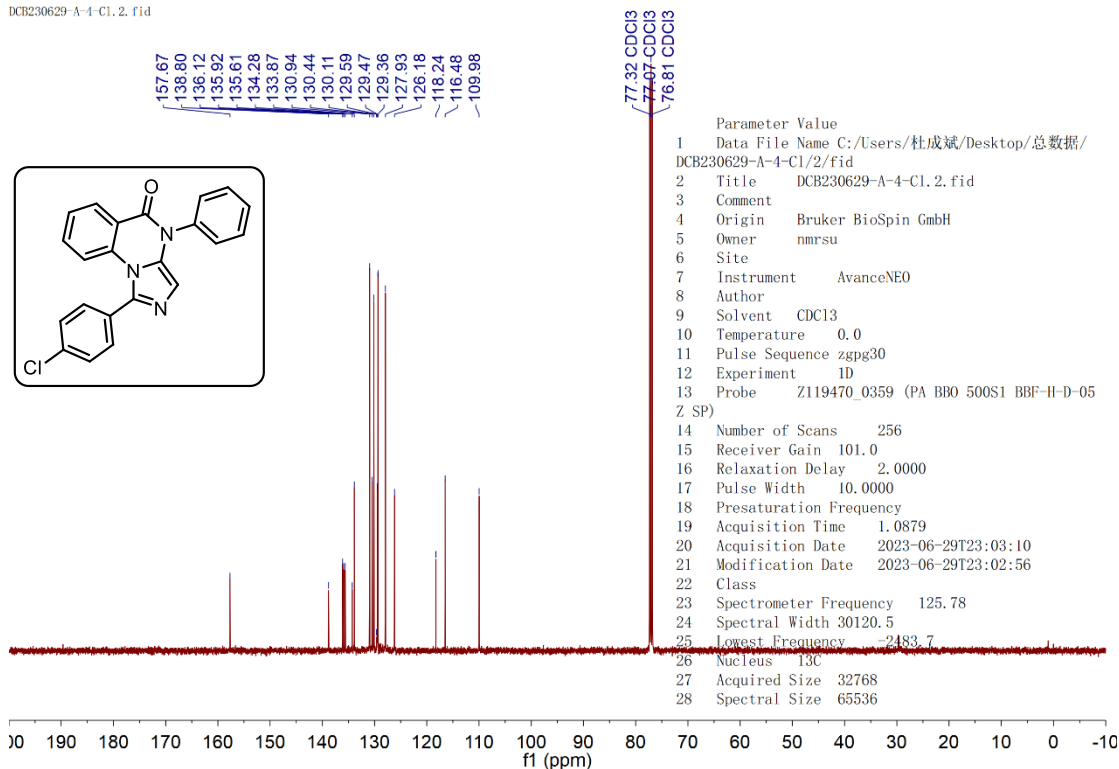

# 1-(4-bromophenyl)-4-phenylimidazo[1,5-a]quinazolin-5(4H)-one (3aj)

DCB230629-A-4-Br.1.fid

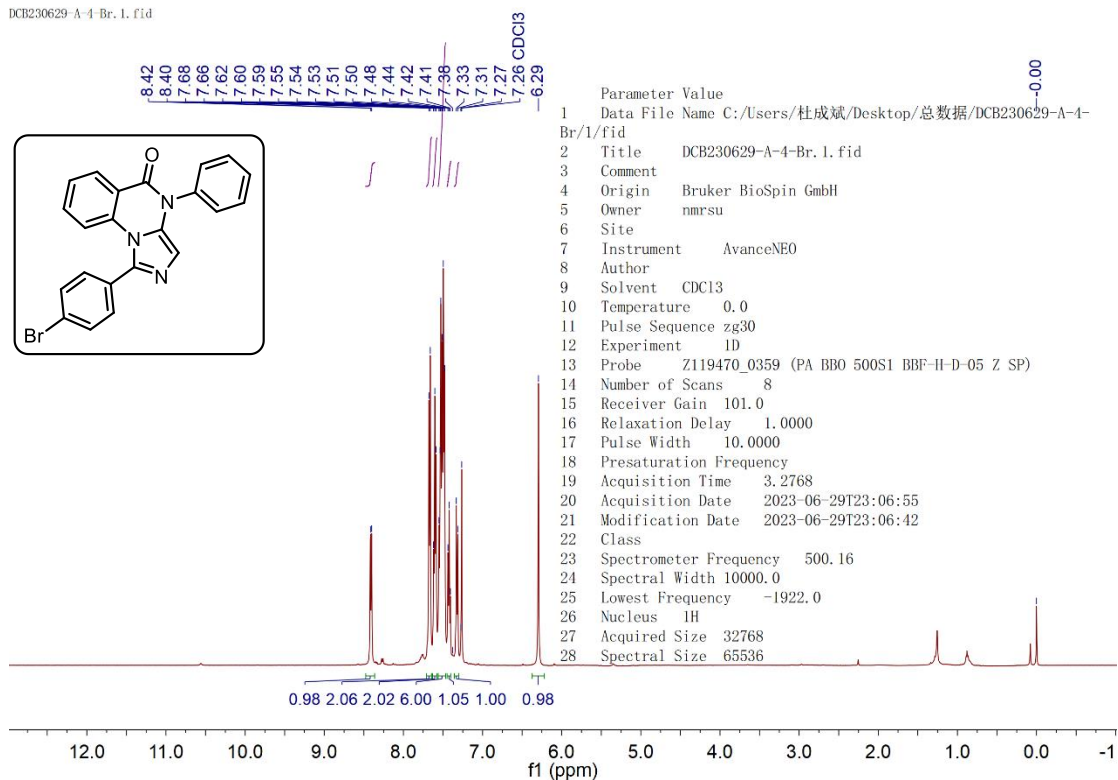

DCB230629-A-4-Br.2.fid

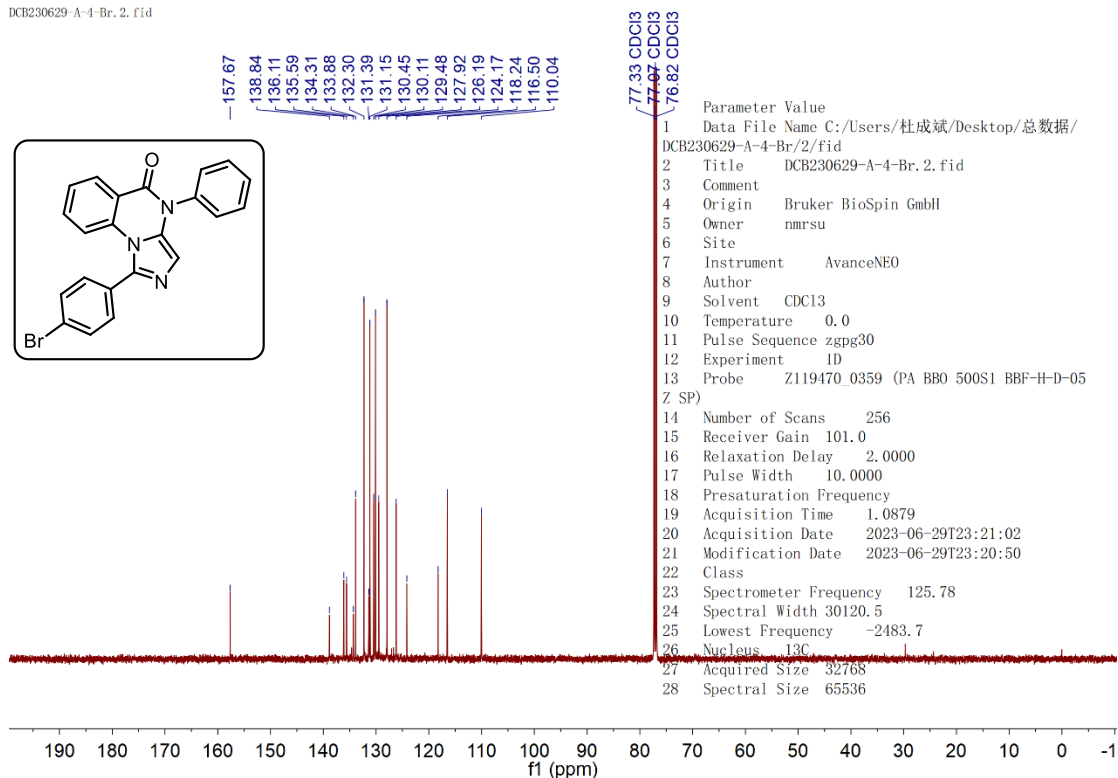

# 1-(2-chloro-4-fluorophenyl)-4-phenylimidazo[1,5-a]quinazolin-5(4H)-one (3ak)

DCB-A-2F4Cl.1.fid

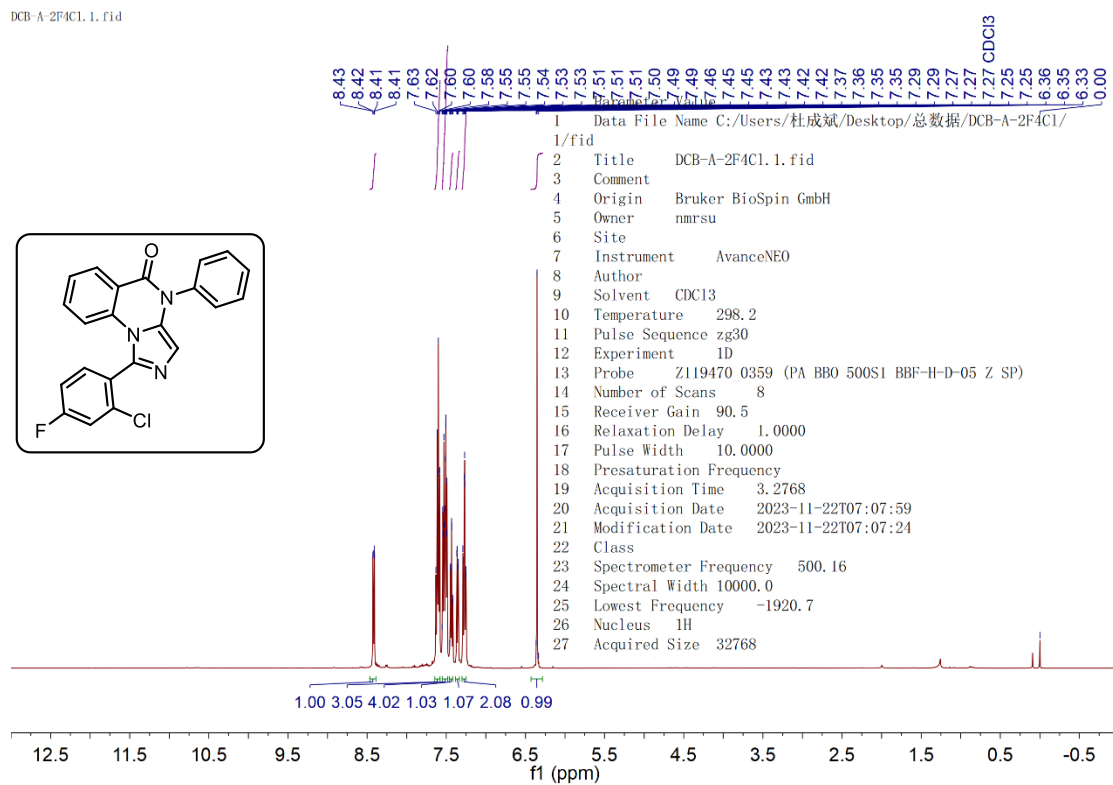

DCB-A-2F4Cl.2.fid

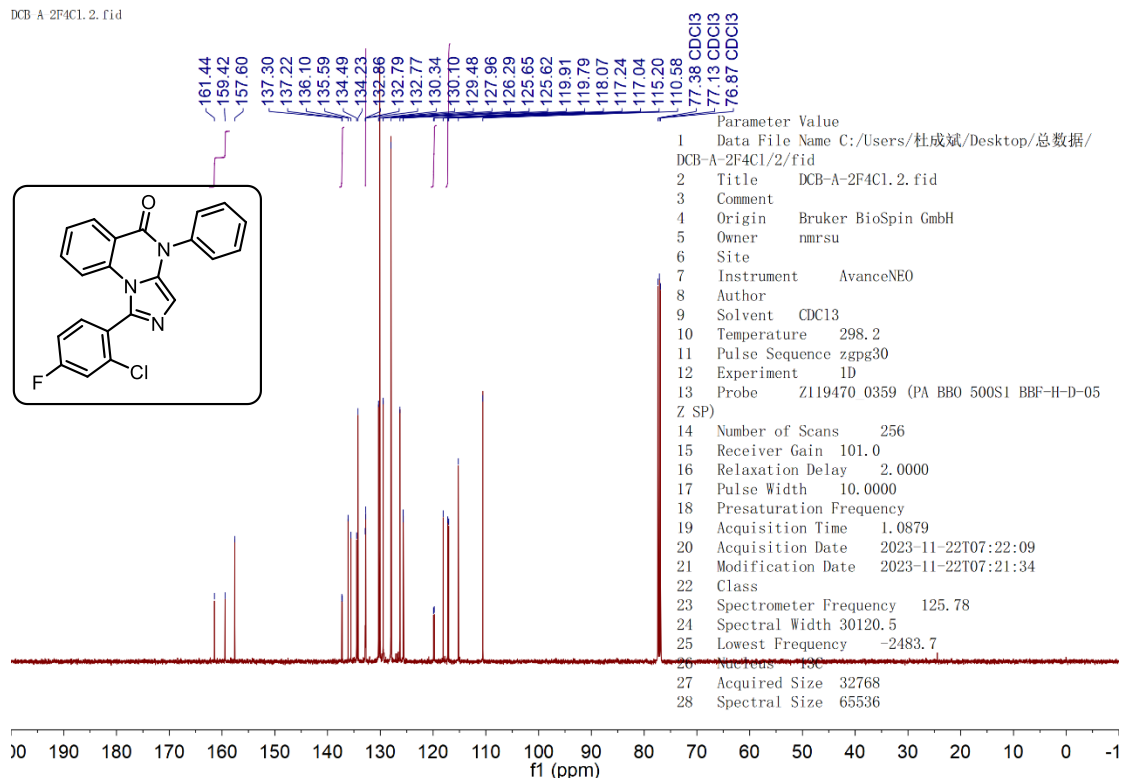

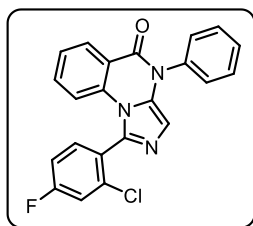

--109.39

| Parameter | Value                                                     |
|-----------|-----------------------------------------------------------|
| 1         | Data File Name C:/Users/杜成斌/Desktop/总数据/DCB-A-2F4Cl/3/fid |
| 2         | Title DCB-A-2F4Cl.3.fid                                   |
| 3         | Comment                                                   |
| 4         | Origin Bruker BioSpin GmbH                                |
| 5         | Owner nmrsu                                               |
| 6         | Site                                                      |
| 7         | Instrument AvanceNEO                                      |
| 8         | Author                                                    |
| 9         | Solvent CDCl3                                             |
| 10        | Temperature 298.2                                         |
| 11        | Pulse Sequence zgig                                       |
| 12        | Experiment 1D                                             |
| 13        | Probe Z119470_0359 (PA BBO 500S1 BBF-H-D-05 Z SP)         |
| 14        | Number of Scans 16                                        |
| 15        | Receiver Gain 101.0                                       |
| 16        | Relaxation Delay 1.0000                                   |
| 17        | Pulse Width 15.0000                                       |
| 18        | Presaturation Frequency                                   |
| 19        | Acquisition Time 0.5767                                   |
| 20        | Acquisition Date 2023-11-22T07:23:53                      |
| 21        | Modification Date 2023-11-22T07:23:18                     |
| 22        | Class                                                     |
| 23        | Spectrometer Frequency 470.57                             |
| 24        | Spectral Width 113636.4                                   |
| 25        | Lowest Frequency -103880.2                                |
| 26        | Nucleus 19F                                               |
| 27        | Acquired Size 65536                                       |
| 28        | Spectral Size 131072                                      |

10 0 -10 -20 -30 -40 -50 -60 -70 -80 -90 -100 -110 -120 -130 -140 -150 -160 -170 -180 -190 -200 -210 -220  
f1 (ppm)

# 1-(benzo[d][1,3]dioxol-5-yl)-4-phenylimidazo[1,5-a]quinazolin-5(4H)-one (3a)

DCB-A-Sesame. 1.fid

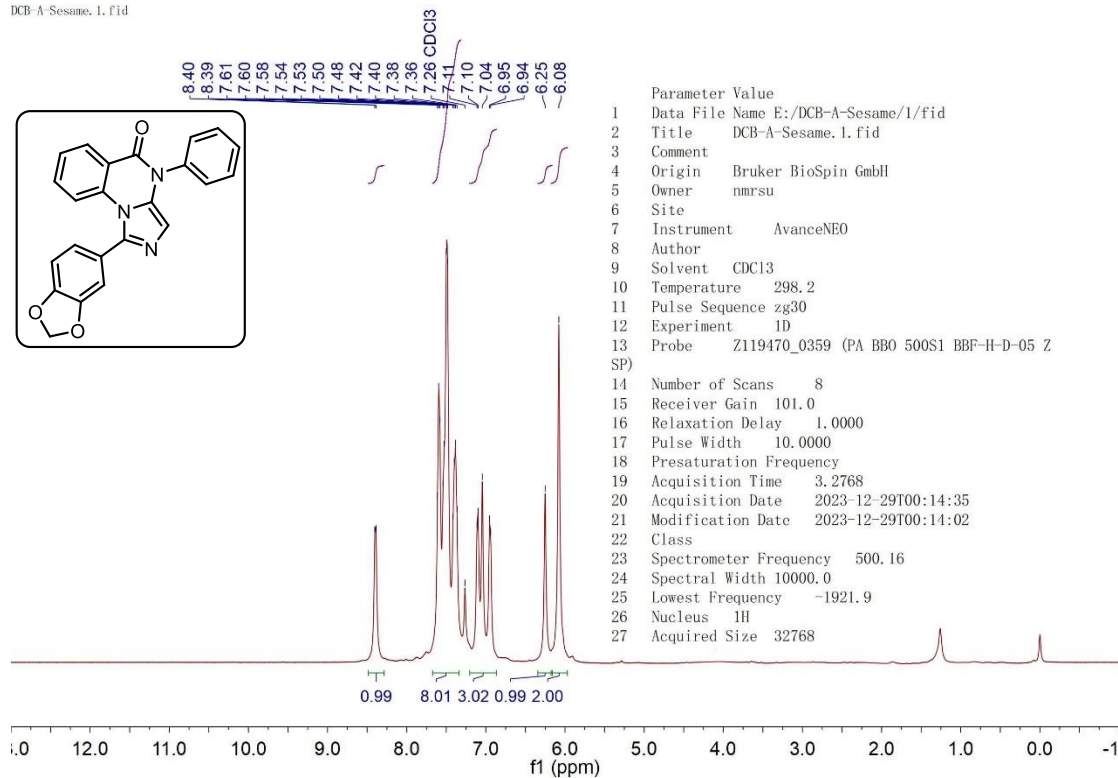

DCB-A-Sesame. 2.fid

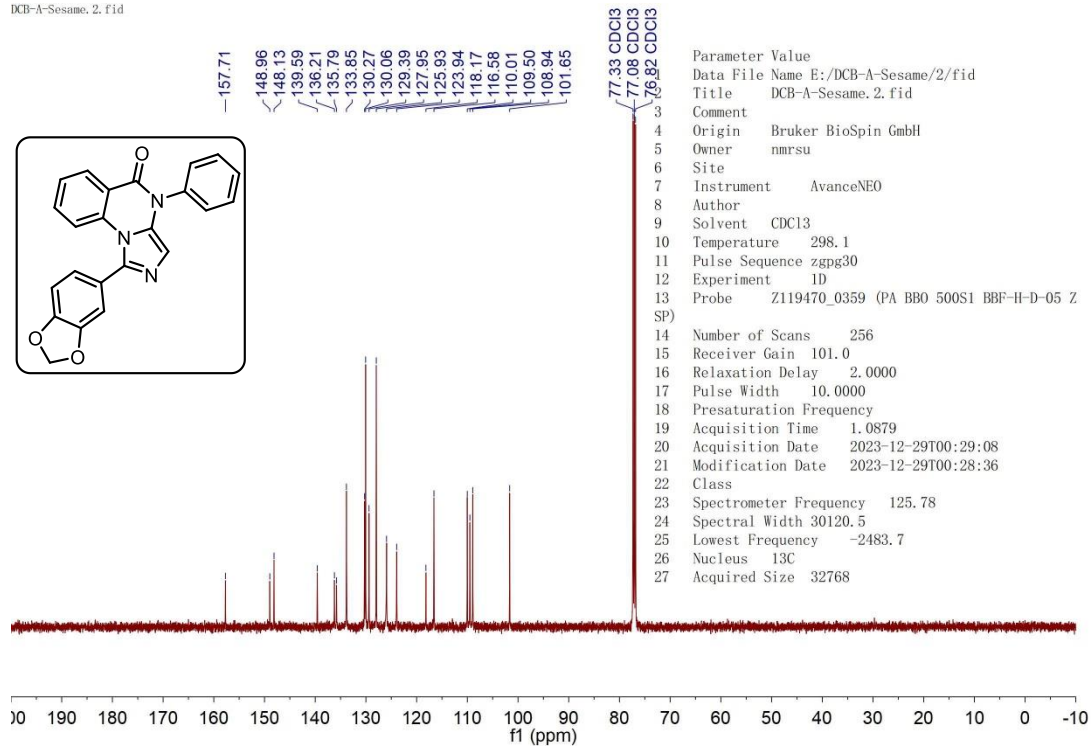



# 4-phenyl-1-(thiophen-2-yl)imidazo[1,5-a]quinazolin-5(4H)-one (3am)

DCB230629-A-Thio.1.fid

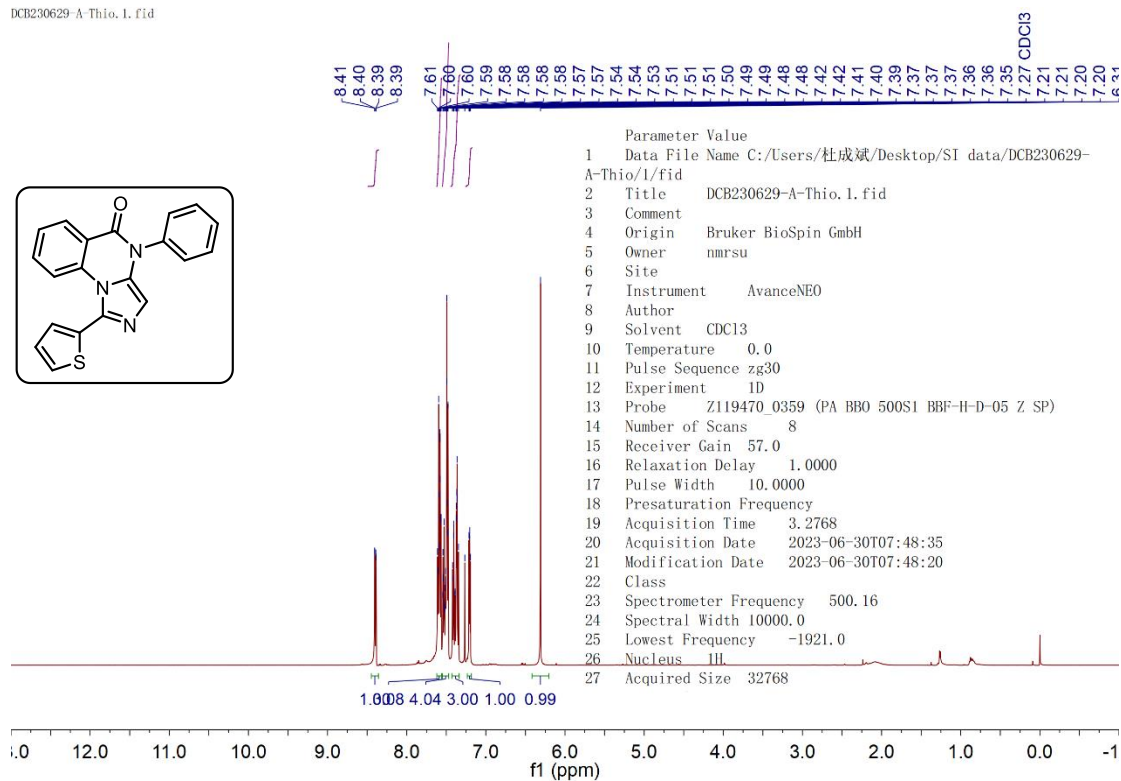

DCB230629-A-Thio.2.fid

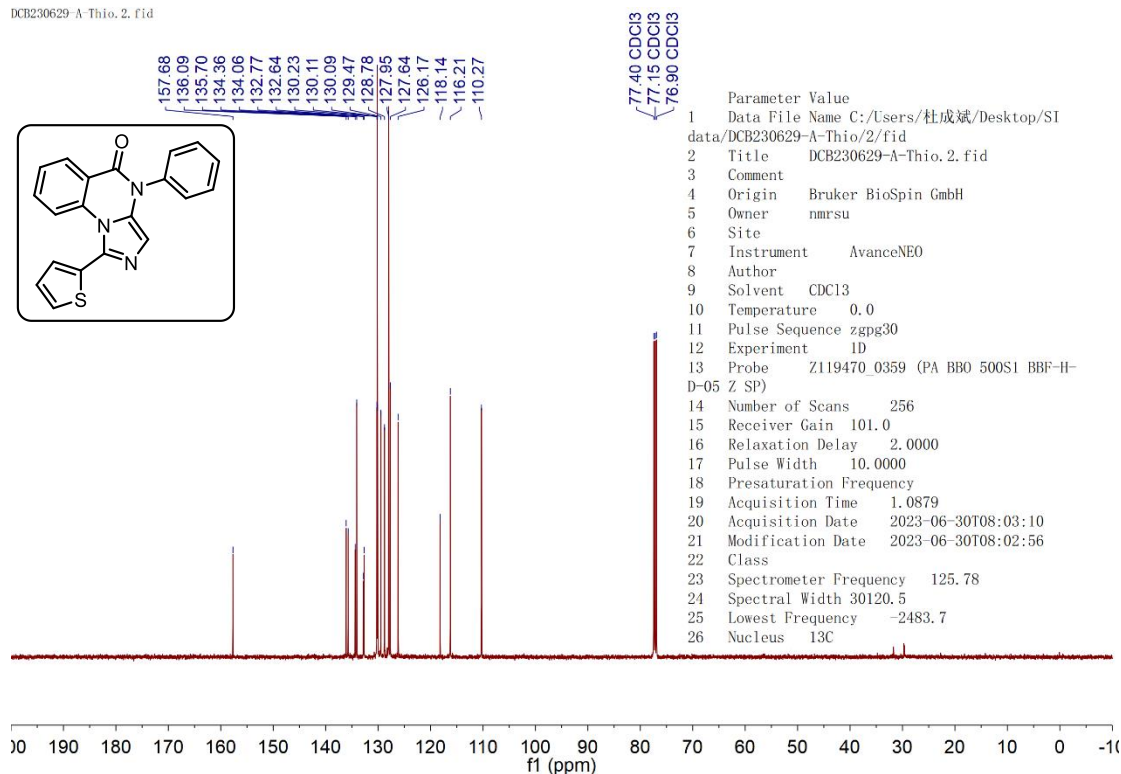

# 6-bromo-1,4-diphenylimidazo[1,5-a]quinazolin-5(4H)-one (3ba)

DCB-A-5Br.3.fid

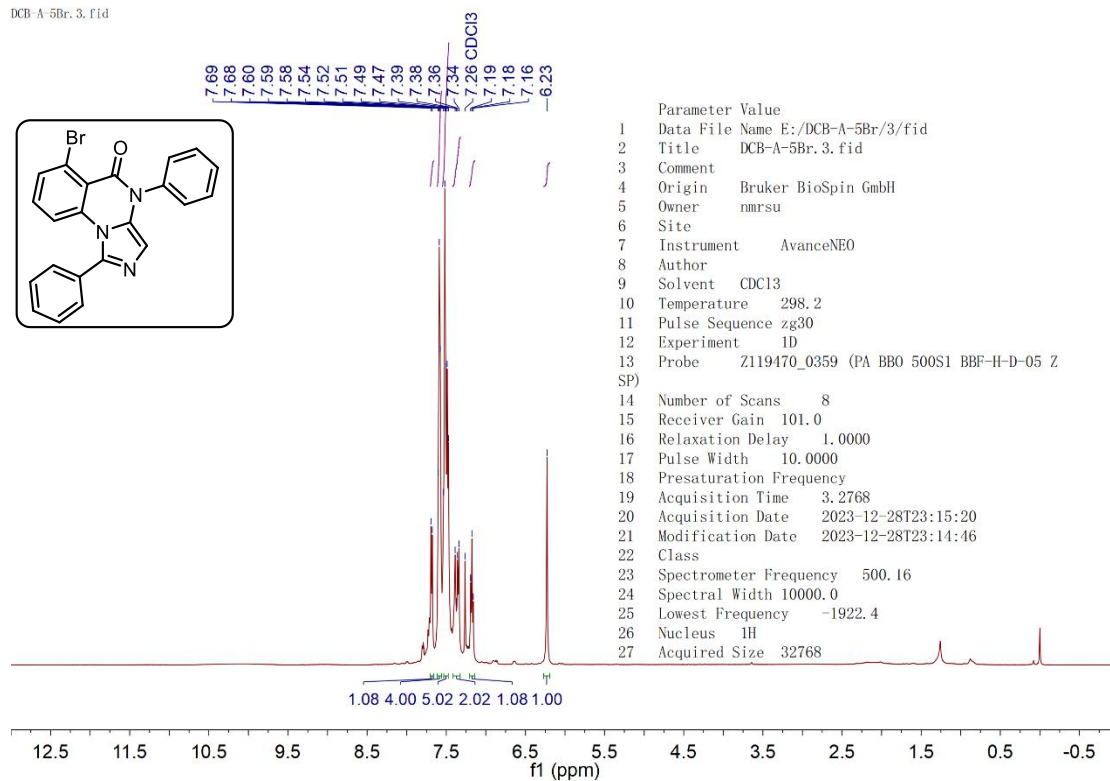

DCB-A-5Br.4.fid

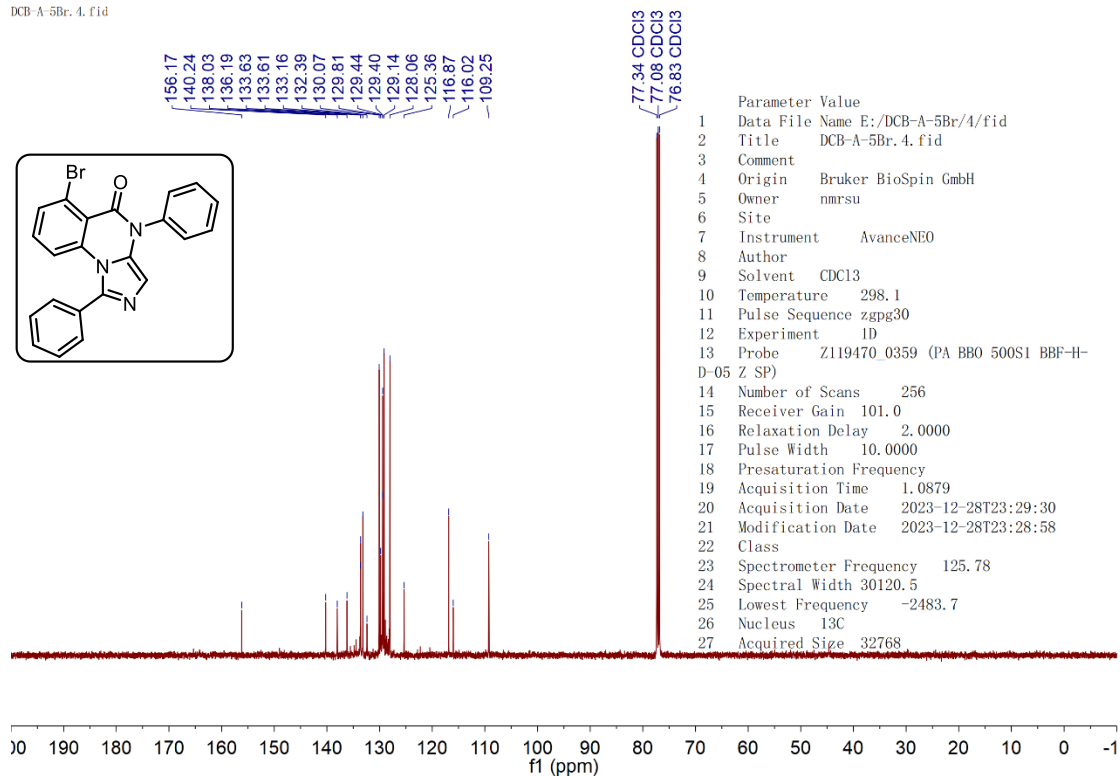

# 7-fluoro-1,4-diphenylimidazo[1,5-a]quinazolin-5(4H)-one (3ca)

DCB-A-6F.7.fid

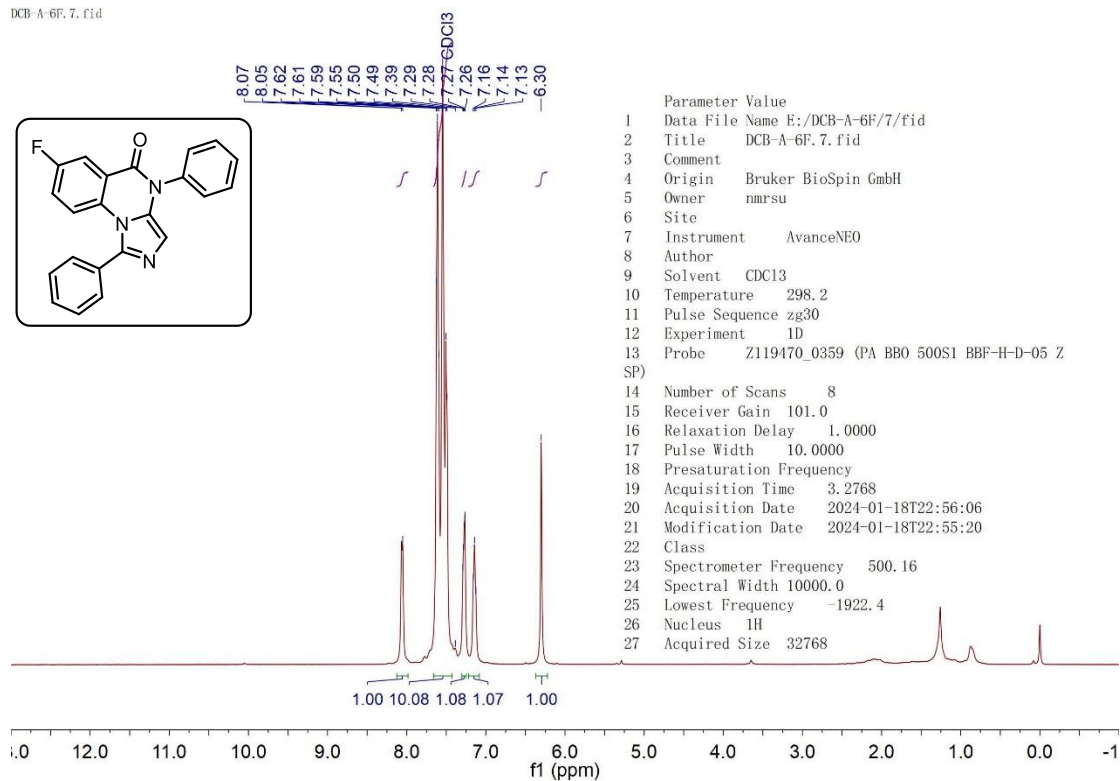

Parameter Value

|    |                         |                                             |
|----|-------------------------|---------------------------------------------|
| 1  | Data File Name          | E:/DCB-A-6F/7/fid                           |
| 2  | Title                   | DCB-A-6F.7.fid                              |
| 3  | Comment                 |                                             |
| 4  | Origin                  | Bruker BioSpin GmbH                         |
| 5  | Owner                   | nmr-su                                      |
| 6  | Site                    |                                             |
| 7  | Instrument              | AvanceNEO                                   |
| 8  | Author                  |                                             |
| 9  | Solvent                 | CDCl <sub>3</sub>                           |
| 10 | Temperature             | 298.2                                       |
| 11 | Pulse Sequence          | zg30                                        |
| 12 | Experiment              | 1D                                          |
| 13 | Probe                   | Z119470_0359 (PA BBO 500S1 BBF-H-D-05 Z SP) |
| 14 | Number of Scans         | 8                                           |
| 15 | Receiver Gain           | 101.0                                       |
| 16 | Relaxation Delay        | 1.0000                                      |
| 17 | Pulse Width             | 10.0000                                     |
| 18 | Presaturation Frequency |                                             |
| 19 | Acquisition Time        | 3.2768                                      |
| 20 | Acquisition Date        | 2024-01-18T22:56:06                         |
| 21 | Modification Date       | 2024-01-18T22:55:20                         |
| 22 | Class                   |                                             |
| 23 | Spectrometer Frequency  | 500.16                                      |
| 24 | Spectral Width          | 10000.0                                     |
| 25 | Lowest Frequency        | -1922.4                                     |
| 26 | Nucleus                 | <sup>1</sup> H                              |
| 27 | Acquired Size           | 32768                                       |

DCB-A-6F.8.fid

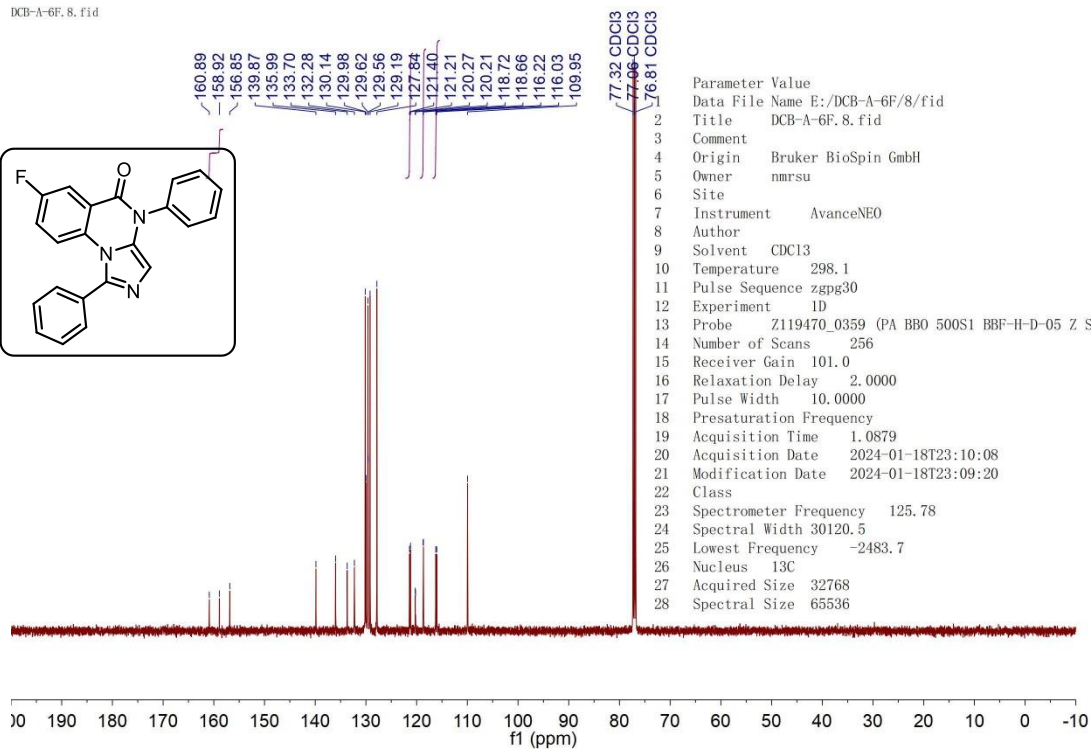

Parameter Value

|    |                         |                                             |
|----|-------------------------|---------------------------------------------|
| 1  | Data File Name          | E:/DCB-A-6F/8/fid                           |
| 2  | Title                   | DCB-A-6F.8.fid                              |
| 3  | Comment                 |                                             |
| 4  | Origin                  | Bruker BioSpin GmbH                         |
| 5  | Owner                   | nmr-su                                      |
| 6  | Site                    |                                             |
| 7  | Instrument              | AvanceNEO                                   |
| 8  | Author                  |                                             |
| 9  | Solvent                 | CDCl <sub>3</sub>                           |
| 10 | Temperature             | 298.1                                       |
| 11 | Pulse Sequence          | zgpg30                                      |
| 12 | Experiment              | 1D                                          |
| 13 | Probe                   | Z119470_0359 (PA BBO 500S1 BBF-H-D-05 Z SP) |
| 14 | Number of Scans         | 256                                         |
| 15 | Receiver Gain           | 101.0                                       |
| 16 | Relaxation Delay        | 2.0000                                      |
| 17 | Pulse Width             | 10.0000                                     |
| 18 | Presaturation Frequency |                                             |
| 19 | Acquisition Time        | 1.0879                                      |
| 20 | Acquisition Date        | 2024-01-18T23:10:08                         |
| 21 | Modification Date       | 2024-01-18T23:09:20                         |
| 22 | Class                   |                                             |
| 23 | Spectrometer Frequency  | 125.78                                      |
| 24 | Spectral Width          | 30120.5                                     |
| 25 | Lowest Frequency        | -2483.7                                     |
| 26 | Nucleus                 | <sup>13</sup> C                             |
| 27 | Acquired Size           | 32768                                       |
| 28 | Spectral Size           | 65536                                       |

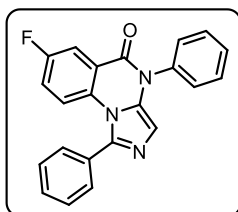

113.99

Parameter Value

|    |                         |                                             |
|----|-------------------------|---------------------------------------------|
| 1  | Data File Name          | E:/DCB-A-6F/9/fid                           |
| 2  | Title                   | DCB-A-6F.9.fid                              |
| 3  | Comment                 |                                             |
| 4  | Origin                  | Bruker BioSpin GmbH                         |
| 5  | Owner                   | nmrsu                                       |
| 6  | Site                    |                                             |
| 7  | Instrument              | AvanceNEO                                   |
| 8  | Author                  |                                             |
| 9  | Solvent                 | CDC13                                       |
| 10 | Temperature             | 298.2                                       |
| 11 | Pulse Sequence          | zg1g                                        |
| 12 | Experiment              | 1D                                          |
| 13 | Probe                   | Z119470_0359 (PA BBO 500S1 BBF-H-D-05 Z SP) |
| 14 | Number of Scans         | 16                                          |
| 15 | Receiver Gain           | 101.0                                       |
| 16 | Relaxation Delay        | 1.0000                                      |
| 17 | Pulse Width             | 15.0000                                     |
| 18 | Presaturation Frequency |                                             |
| 19 | Acquisition Time        | 0.5767                                      |
| 20 | Acquisition Date        | 2024-01-18T23:11:54                         |
| 21 | Modification Date       | 2024-01-18T23:11:06                         |
| 22 | Class                   |                                             |
| 23 | Spectrometer Frequency  | 470.57                                      |
| 24 | Spectral Width          | 113636.4                                    |
| 25 | Lowest Frequency        | -103880.2                                   |
| 26 | Nucleus                 | 19F                                         |
| 27 | Acquired Size           | 65536                                       |

10 0 -10 -20 -30 -40 -50 -60 -70 -80 -90 -100 -110 -120 -130 -140 -150 -160 -170 -180 -190 -200 -210 -220  
f1 (ppm)

# 7-chloro-1,4-diphenylimidazo[1,5-a]quinazolin-5(4H)-one (3da)

DCB-A-6Cl.1.fid

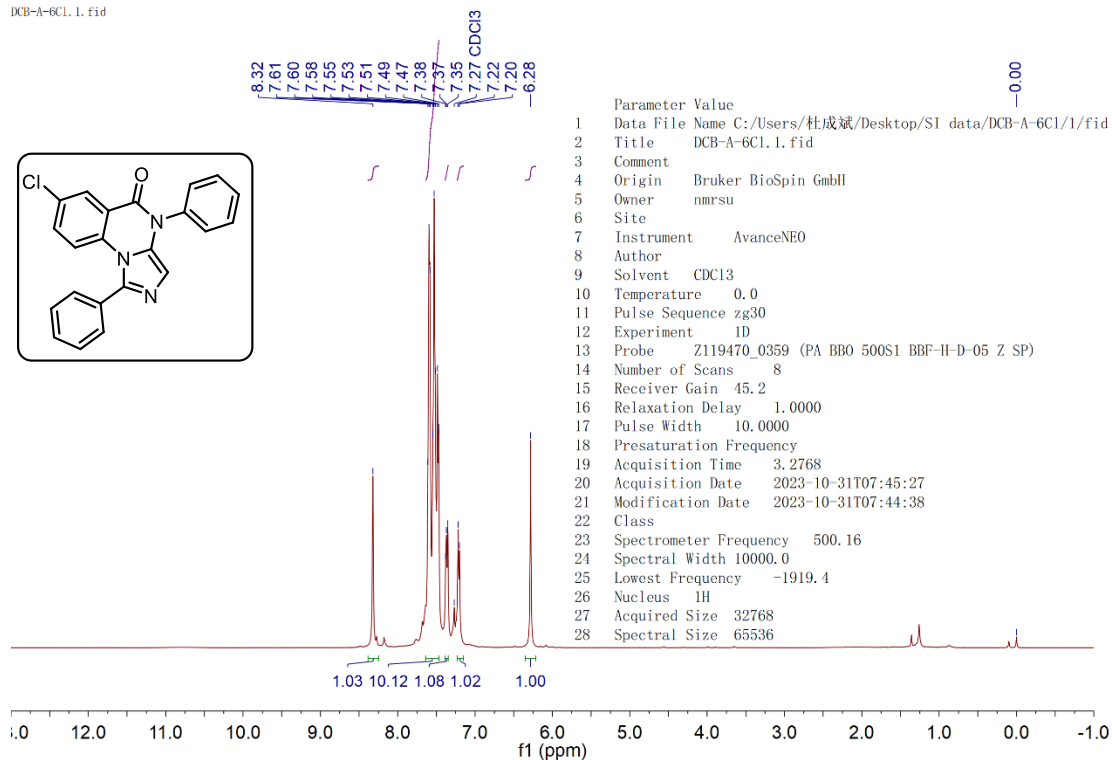

DCB-A-6Cl.2.fid

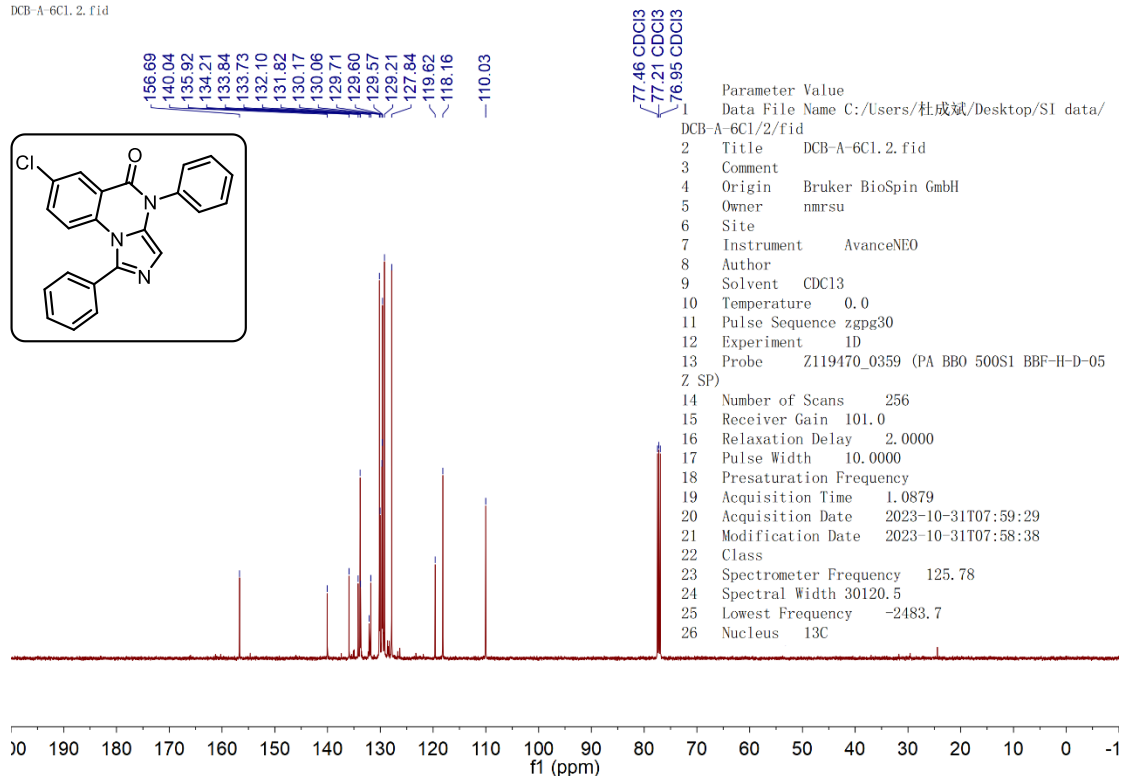

# 8-chloro-1,4-diphenylimidazo[1,5-a]quinazolin-5(4H)-one (3ea)

DCB-A-7C1.1.fid

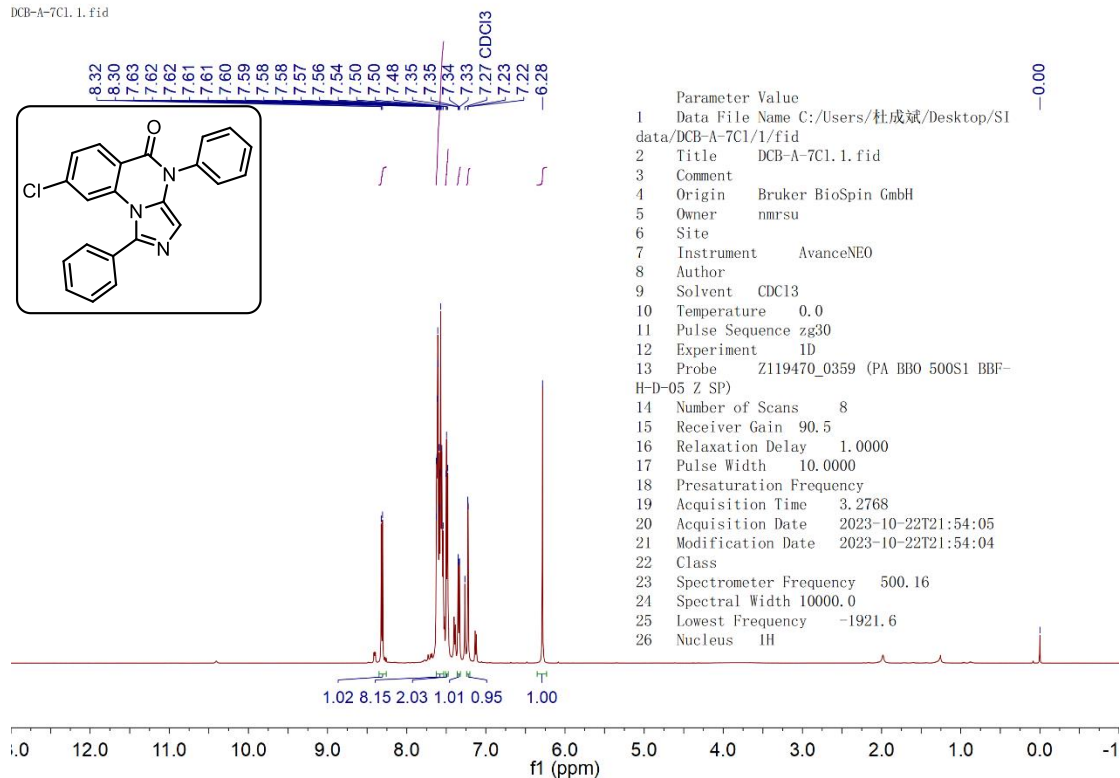

DCB-A-7C1.2.fid

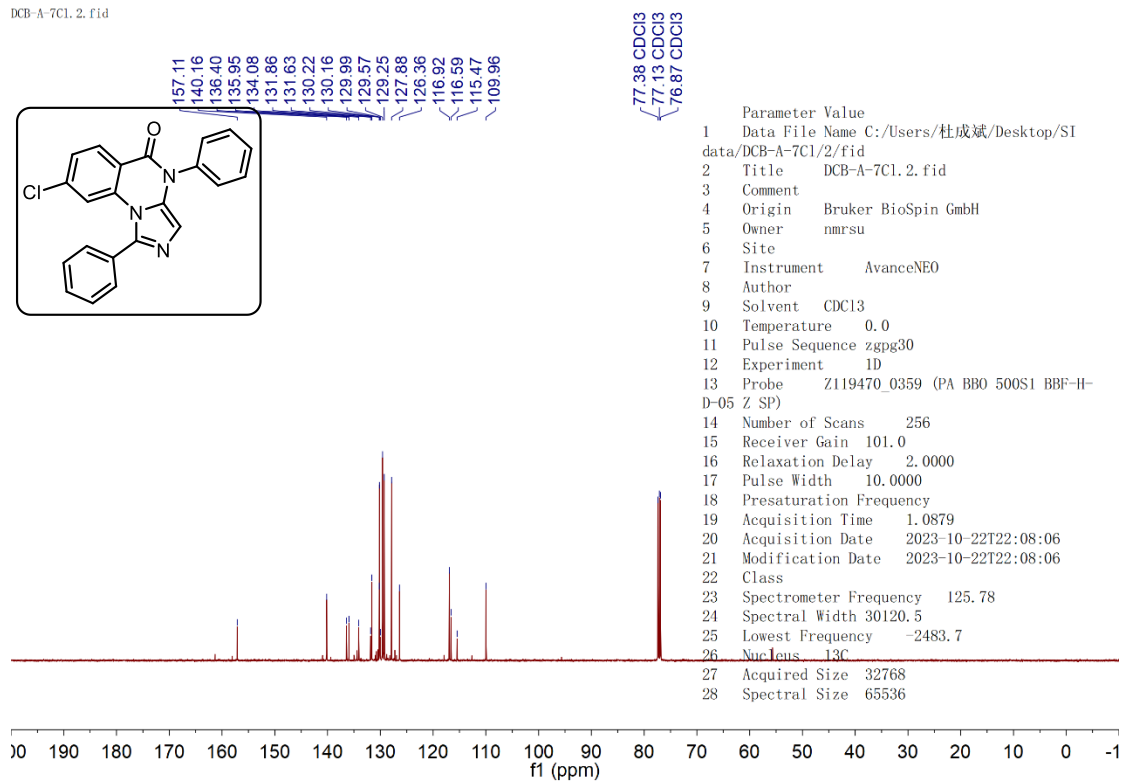

# 9-methyl-1,4-diphenylimidazo[1,5-a]quinazolin-5(4H)-one (3fa)

DCB-A-8Me1.1.fid

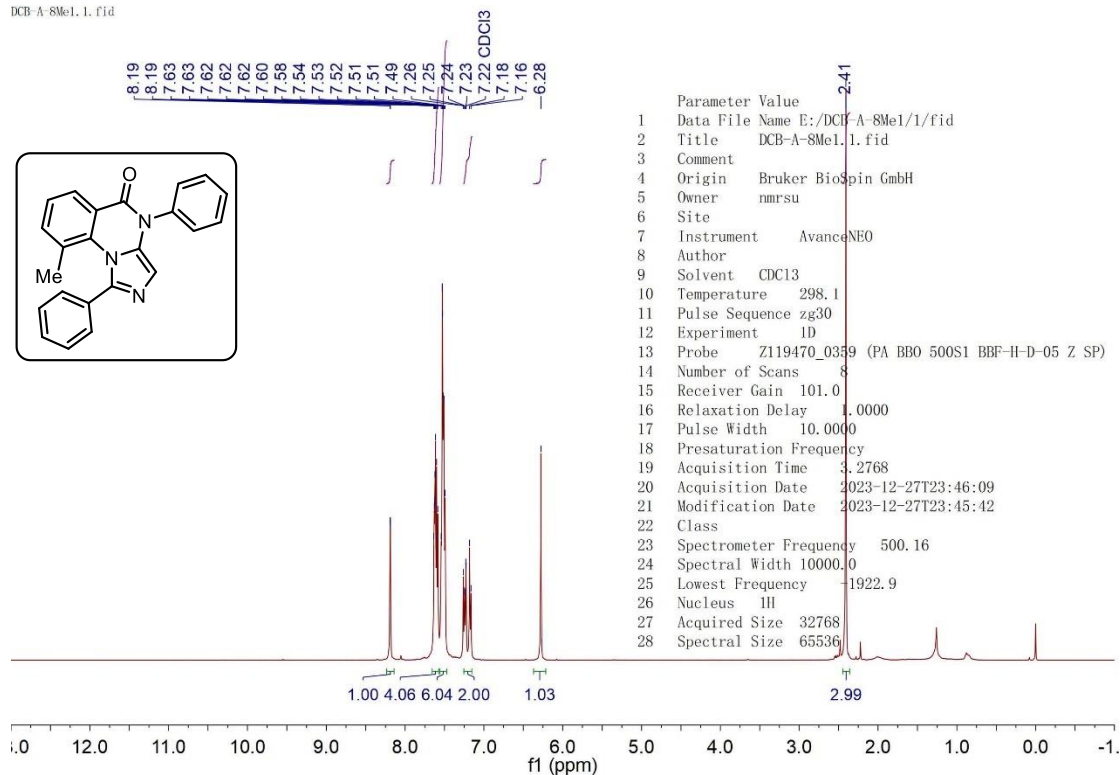

DCB-A-8Me1.2.fid

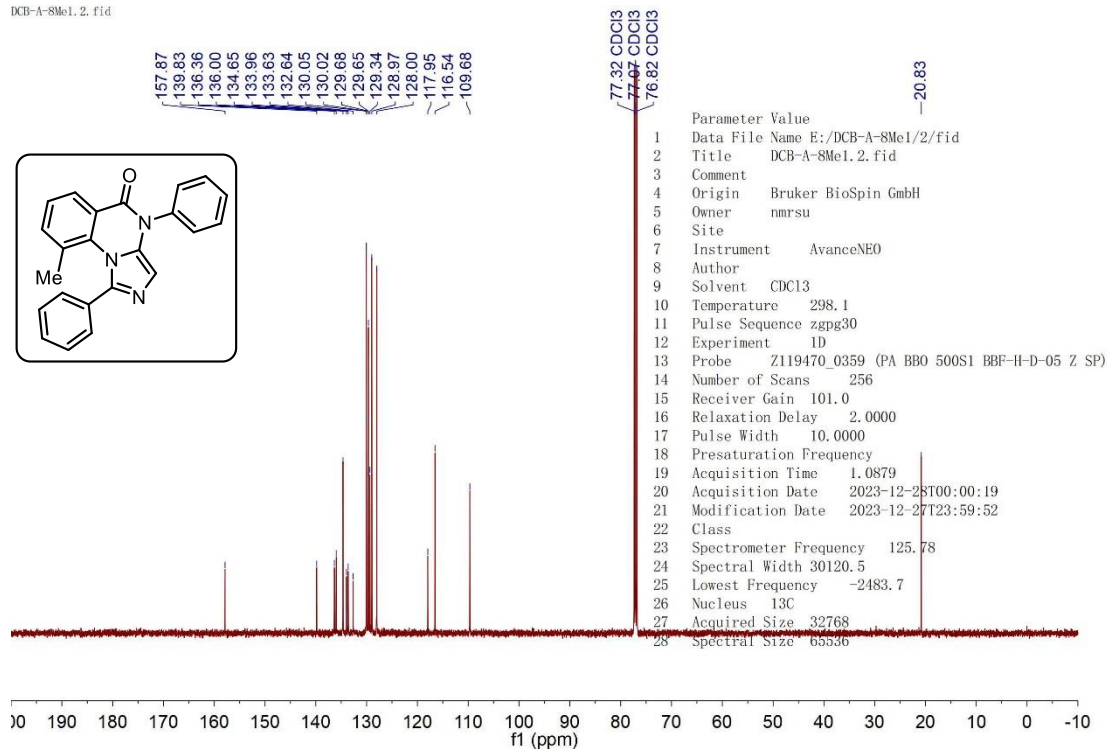

# 4-(4-methoxyphenyl)-1-phenylimidazo[1,5-a]quinazolin-5(4H)-one (3ga)

DCB-A-pOMe. 1. fid

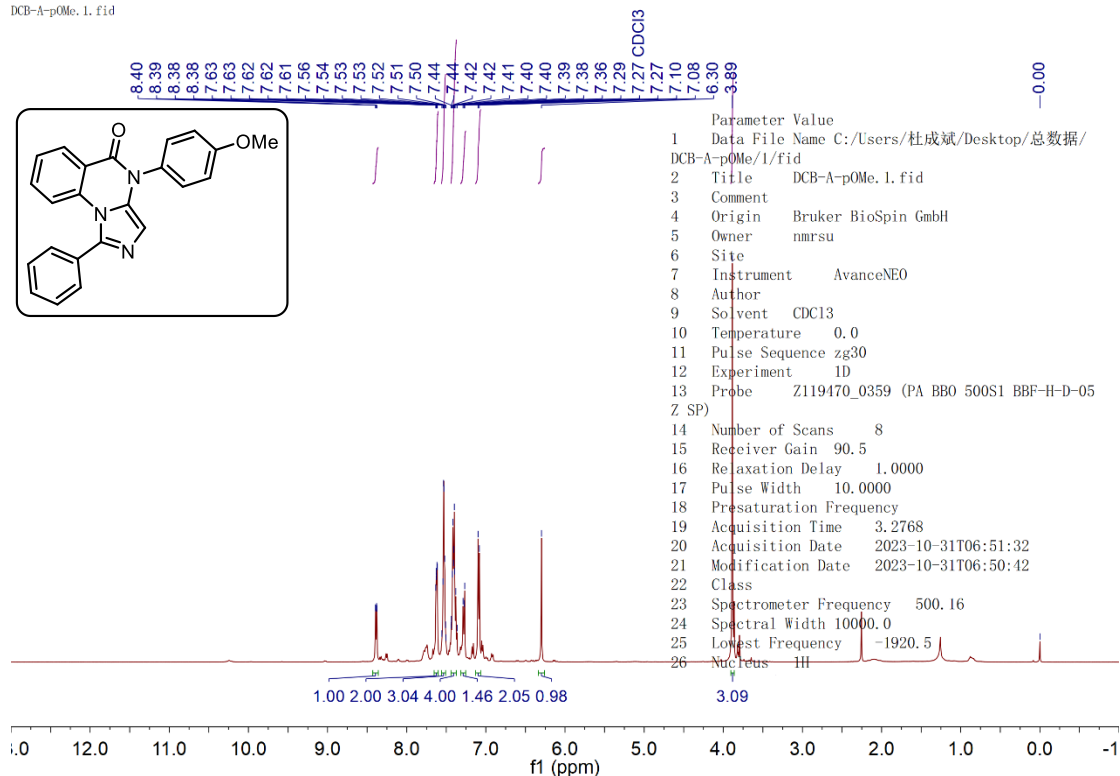

DCB-A-pOMe. 2. fid

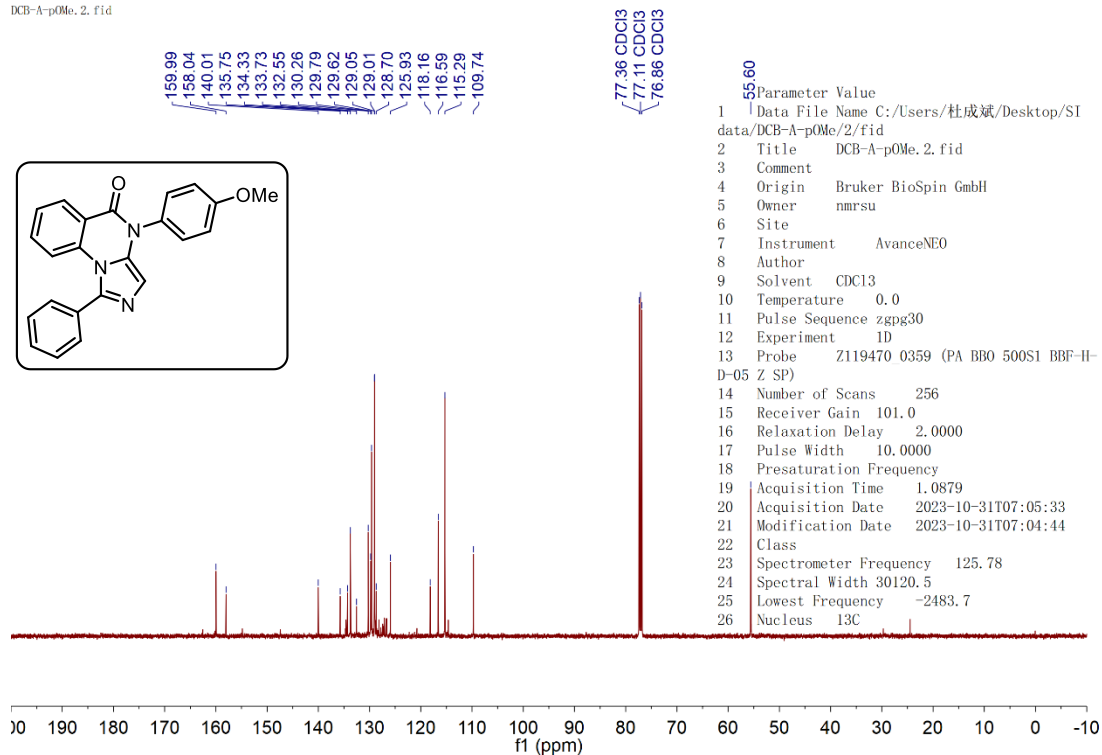



# 1-phenyl-4-(p-tolyl)imidazo[1,5-a]quinazolin-5(4H)-one (3ha)

DCB-A-pMe. 1.fid

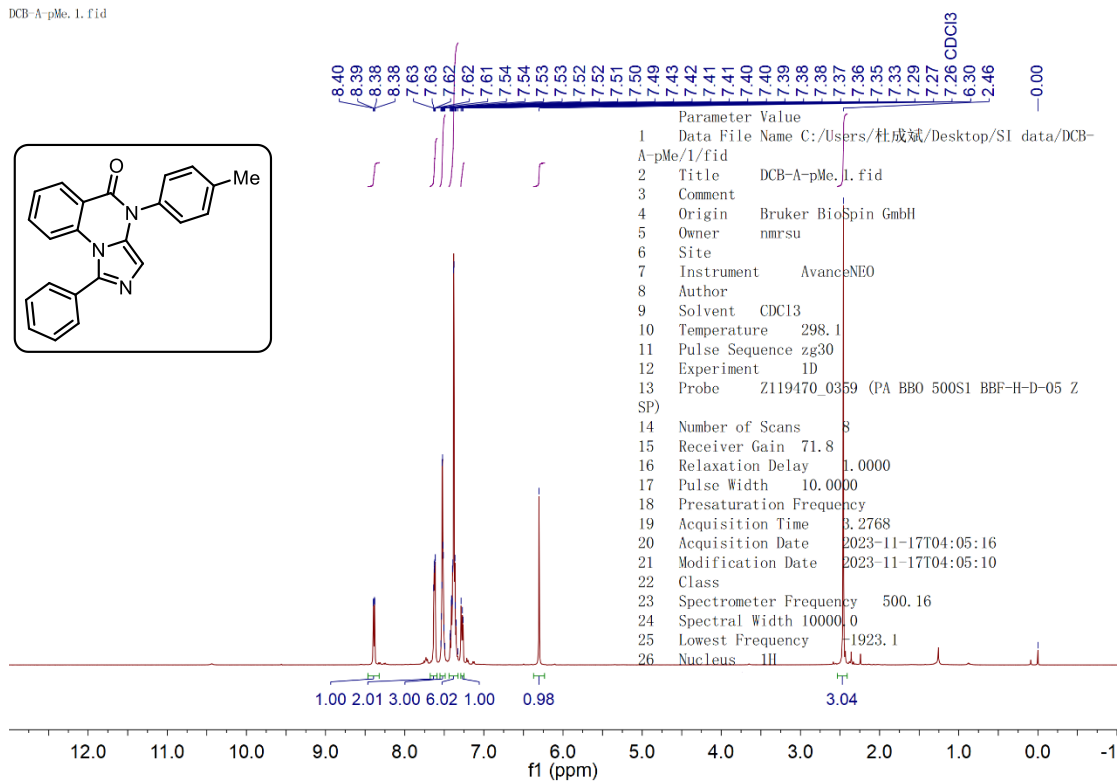

DCB-A-pMe. 2.fid

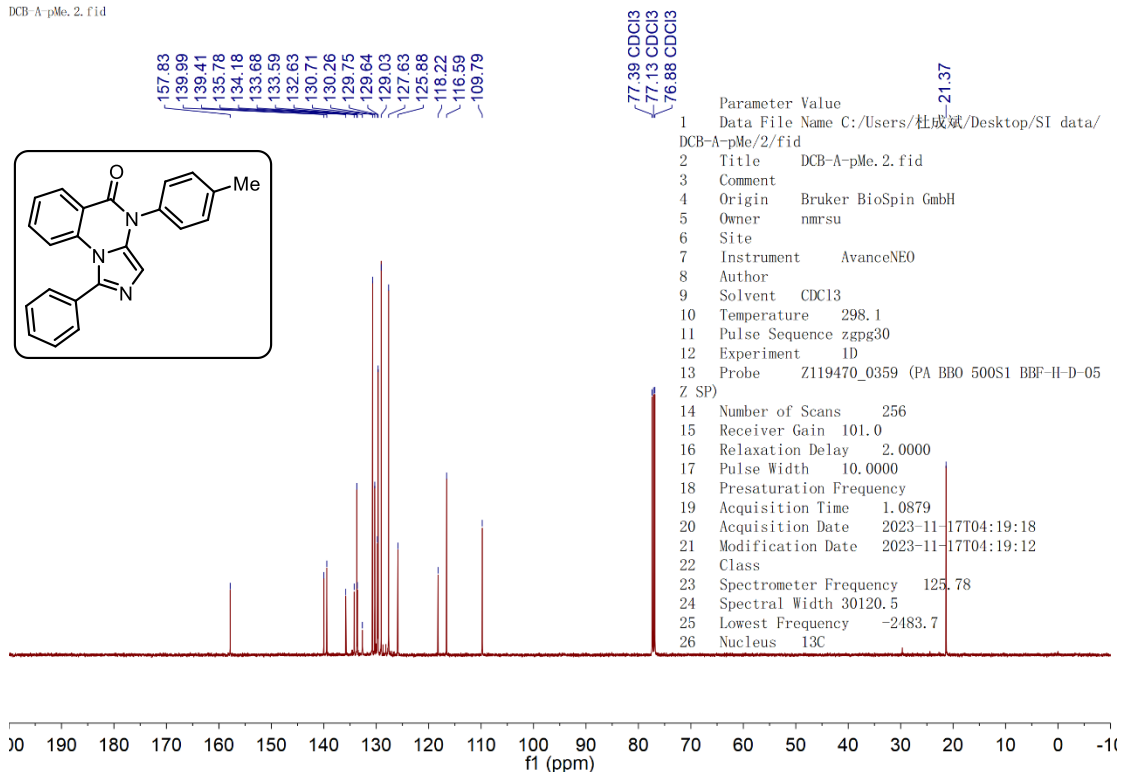

### 4-(4-fluorophenyl)-1-phenylimidazo[1,5-a]quinazolin-5(4H)-one (3ia)

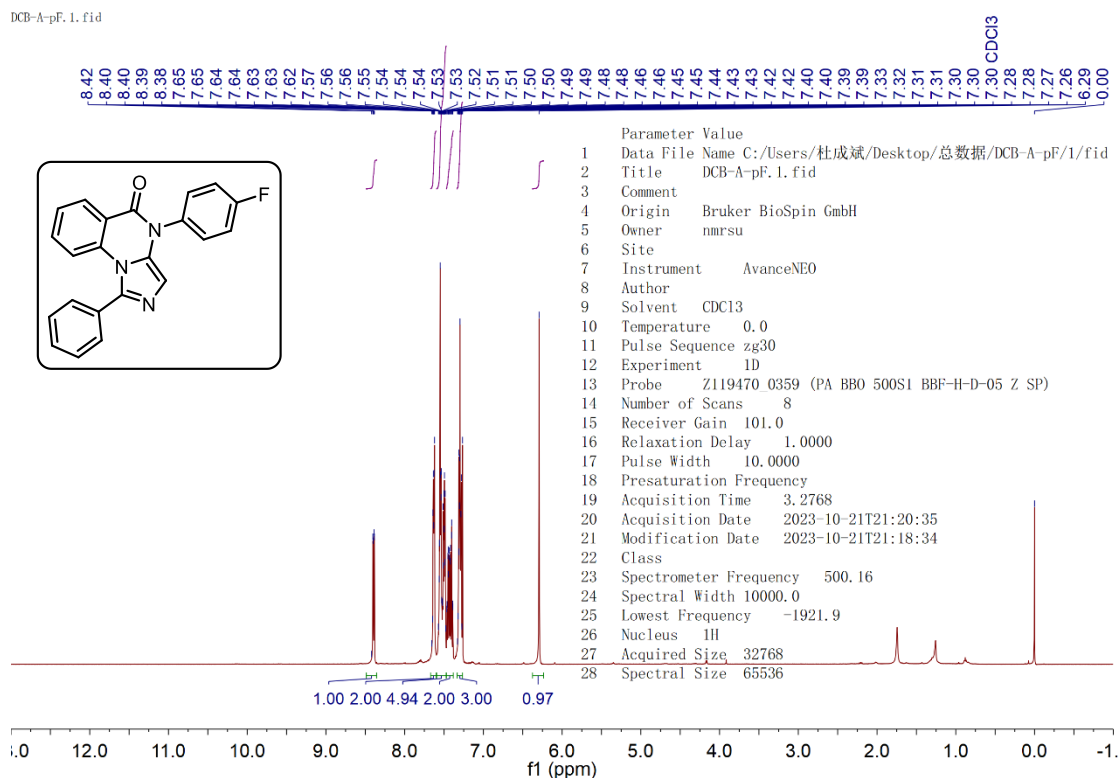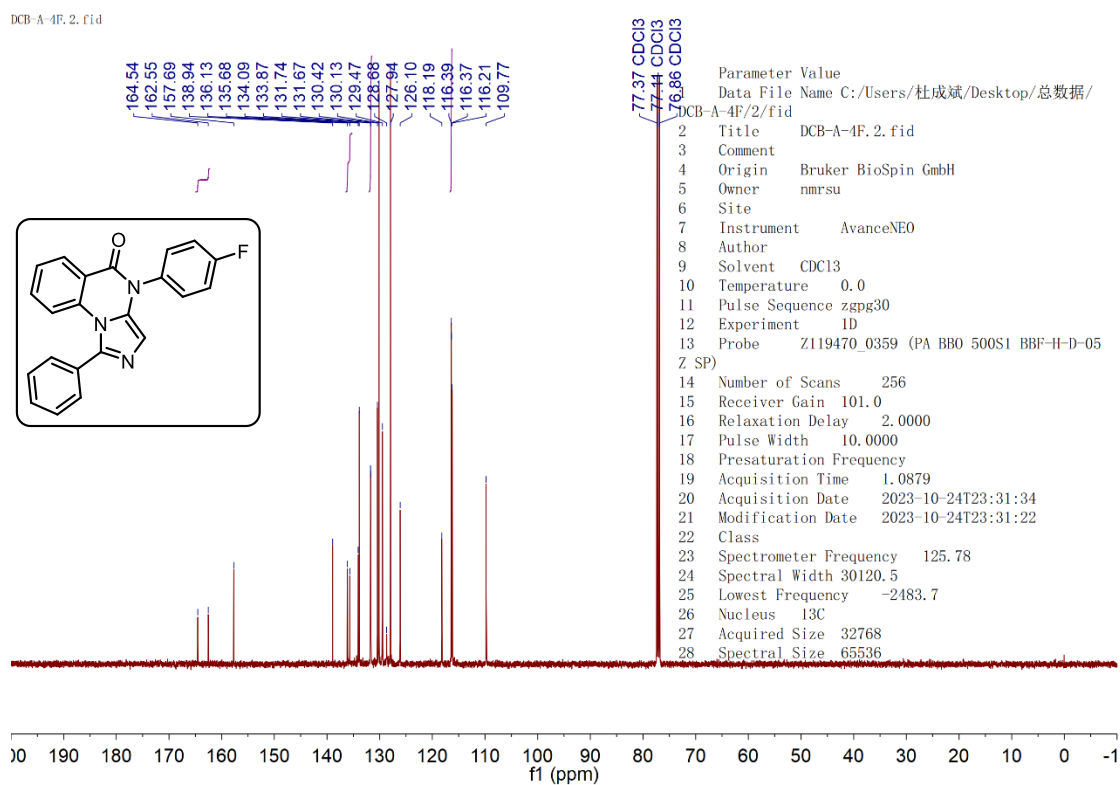

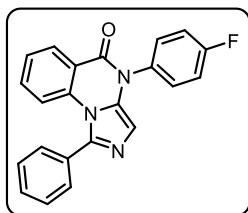

-111.18

Parameter Value

|    |                         |                                             |
|----|-------------------------|---------------------------------------------|
| 1  | Data File Name          | C:/Users/杜成斌/Desktop/总数据/DCB-A-pF/3/fid     |
| 2  | Title                   | DCB-A-pF. 3. fid                            |
| 3  | Comment                 |                                             |
| 4  | Origin                  | Bruker BioSpin GmbH                         |
| 5  | Owner                   | nmr-su                                      |
| 6  | Site                    |                                             |
| 7  | Instrument              | AvanceNEO                                   |
| 8  | Author                  |                                             |
| 9  | Solvent                 | CDCl3                                       |
| 10 | Temperature             | 0.0                                         |
| 11 | Pulse Sequence          | zgig                                        |
| 12 | Experiment              | 1D                                          |
| 13 | Probe                   | Z119470_0359 (PA BBO 500S1 BBF-H-D-05 Z SP) |
| 14 | Number of Scans         | 16                                          |
| 15 | Receiver Gain           | 101.0                                       |
| 16 | Relaxation Delay        | 1.0000                                      |
| 17 | Pulse Width             | 15.0000                                     |
| 18 | Presaturation Frequency |                                             |
| 19 | Acquisition Time        | 0.5767                                      |
| 20 | Acquisition Date        | 2023-10-21T21:36:42                         |
| 21 | Modification Date       | 2023-10-21T21:34:40                         |
| 22 | Class                   |                                             |
| 23 | Spectrometer Frequency  | 470.57                                      |
| 24 | Spectral Width          | 113636.4                                    |
| 25 | Lowest Frequency        | -103880.2                                   |
| 26 | Nucleus                 | 19F                                         |
| 27 | Acquired Size           | 65536                                       |
| 28 | Spectral Size           | 131072                                      |

10 0 -10 -20 -30 -40 -50 -60 -70 -80 -90 -100 -110 -120 -130 -140 -150 -160 -170 -180 -190 -200 -210 -220  
f1 (ppm)

# 4-(4-chlorophenyl)-1-phenylimidazo[1,5-a]quinazolin-5(4H)-one (3ja)

DCB-A-pCl.1.fid

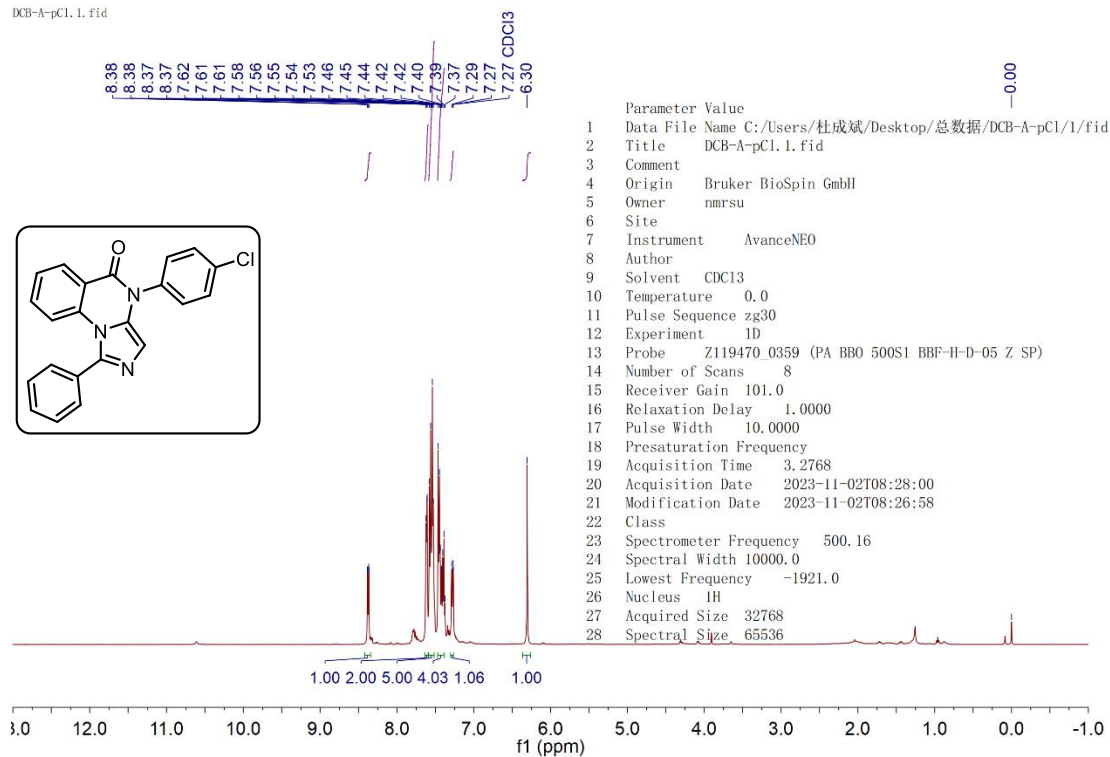

DCB-A-pCl.2.fid

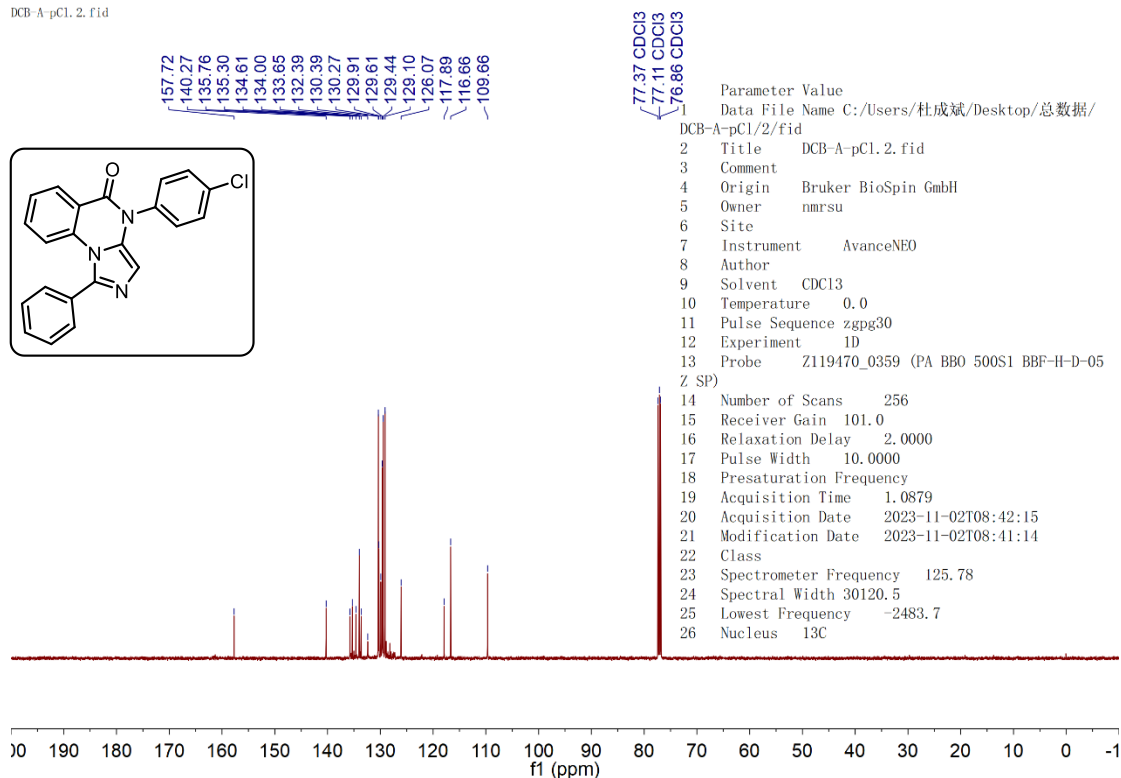

# 1-phenyl-4-(o-tolyl)imidazo[1,5-a]quinazolin-5(4H)-one (3ka)

DCB-A-orthMe. 3.fid

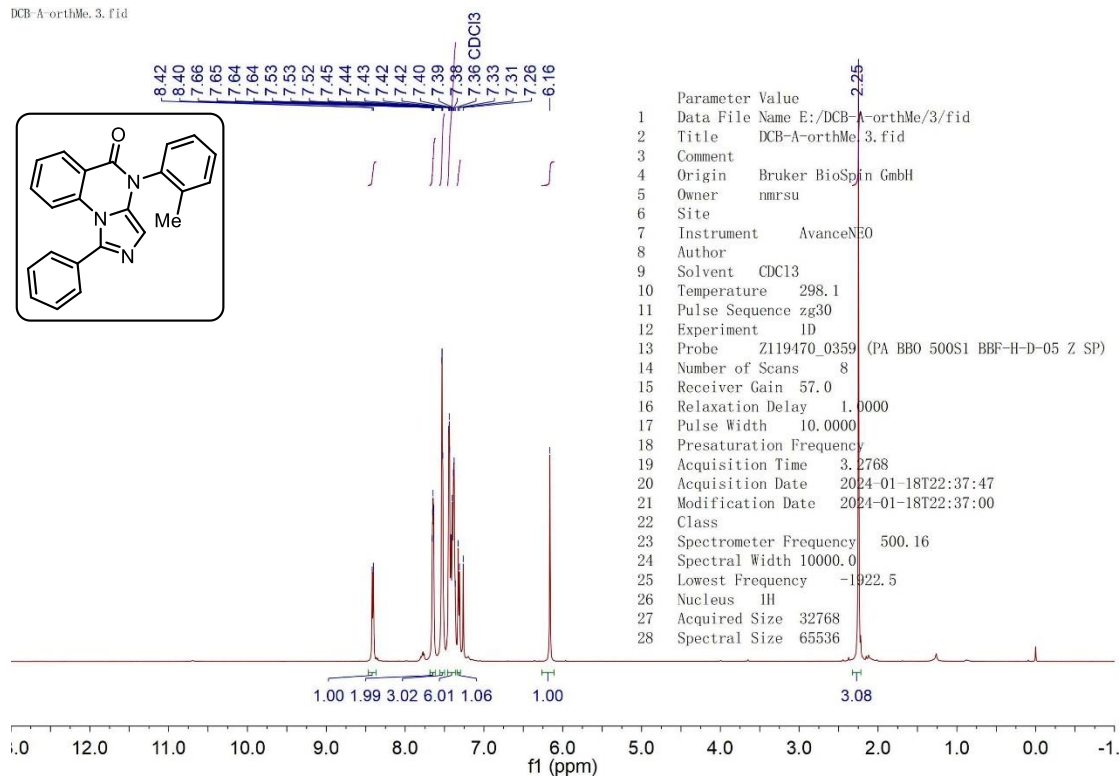

DCB-A-orthMe. 4.fid

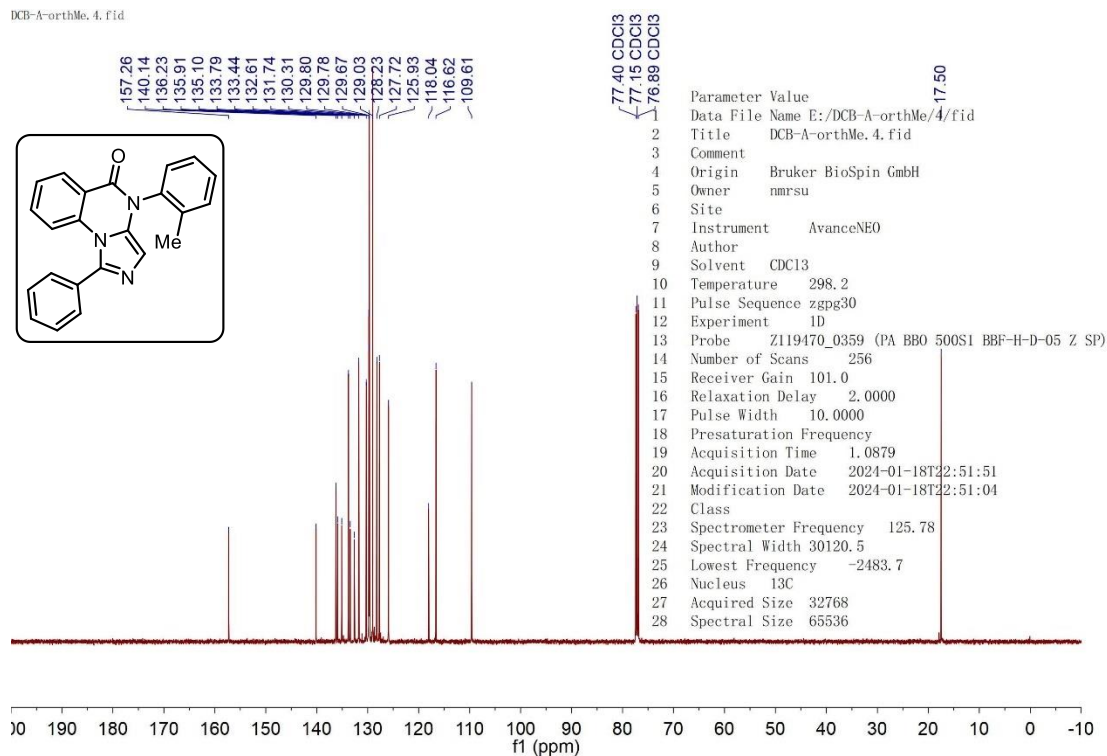

# 5-oxo-1,4-diphenyl-4,5-dihydroimidazo[1,5-a]quinazoline-3-carbonitrile (4aa)

DCB230402-4AA. 1. fid

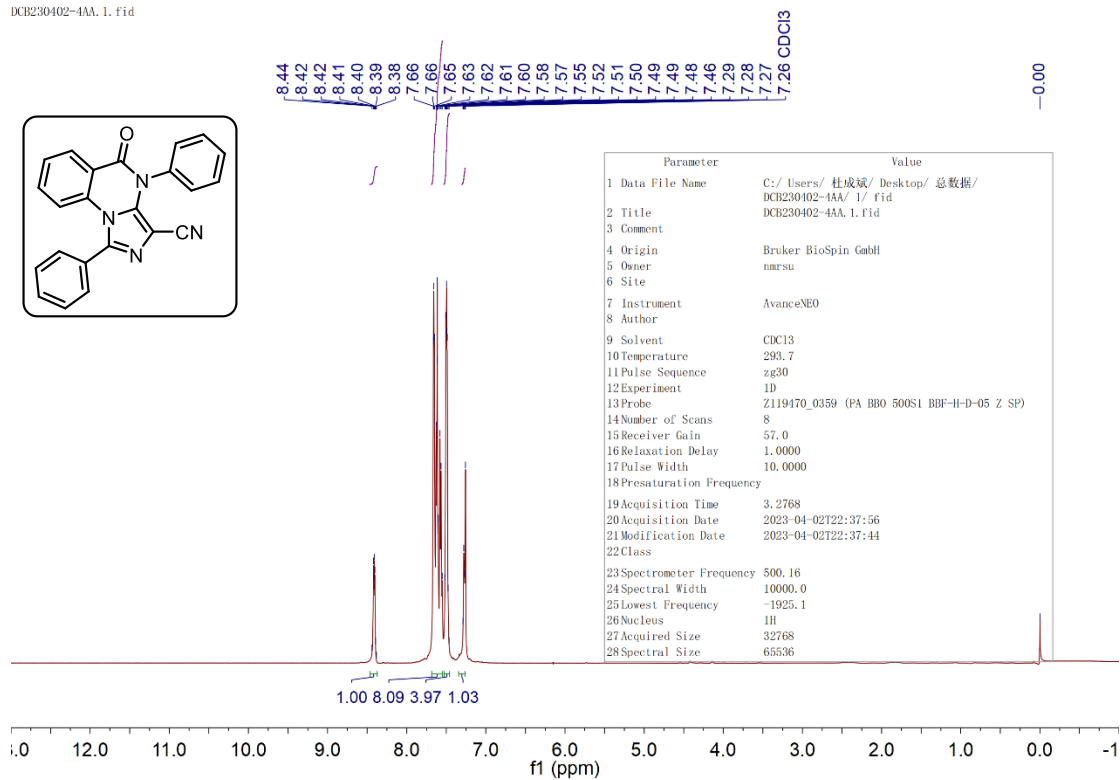

DCB230321-4aa. 2. fid

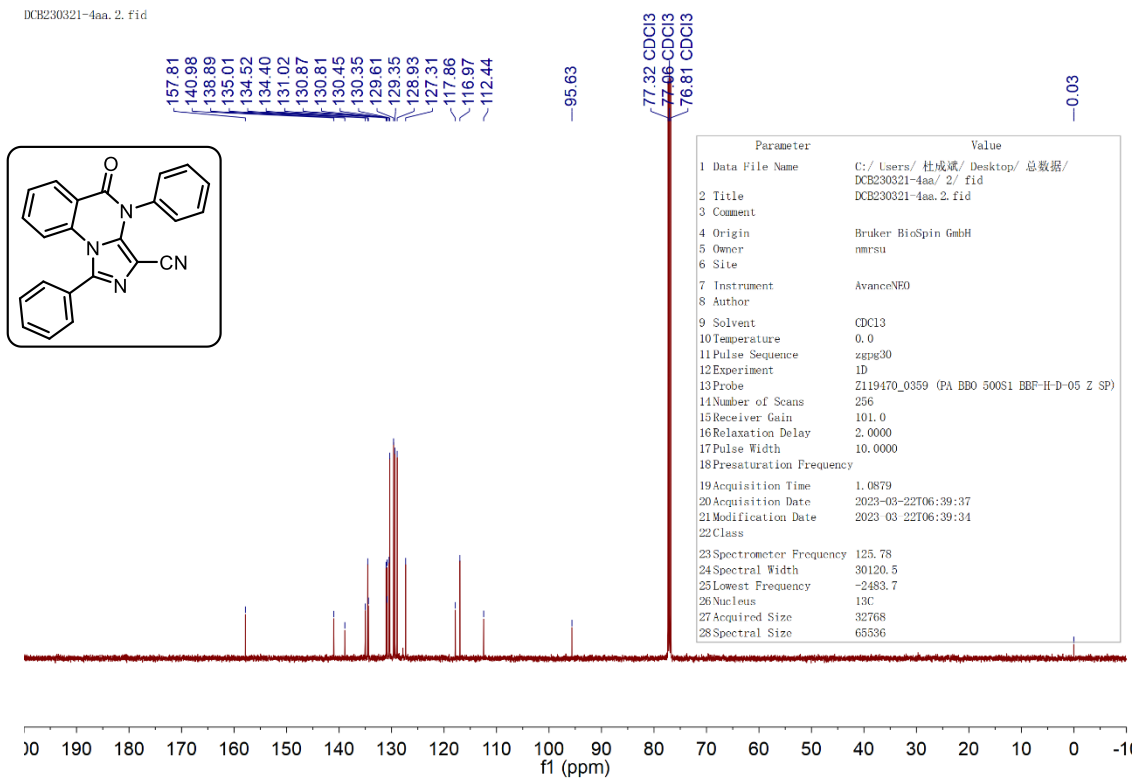

# 6-bromo-5-oxo-1,4-diphenyl-4,5-dihydroimidazo[1,5-a]quinazoline-3-carbonitrile (4ba)

DCB-B-5Br. 7. fid

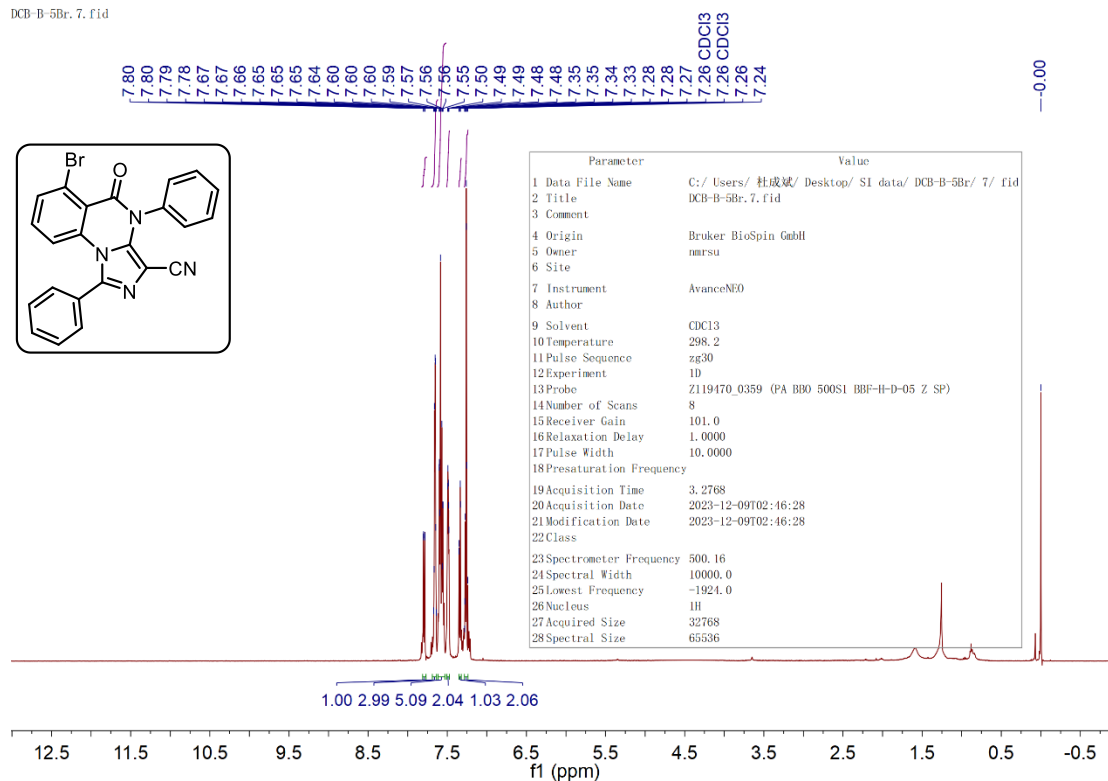

DCB-B-5Br. 8. fid

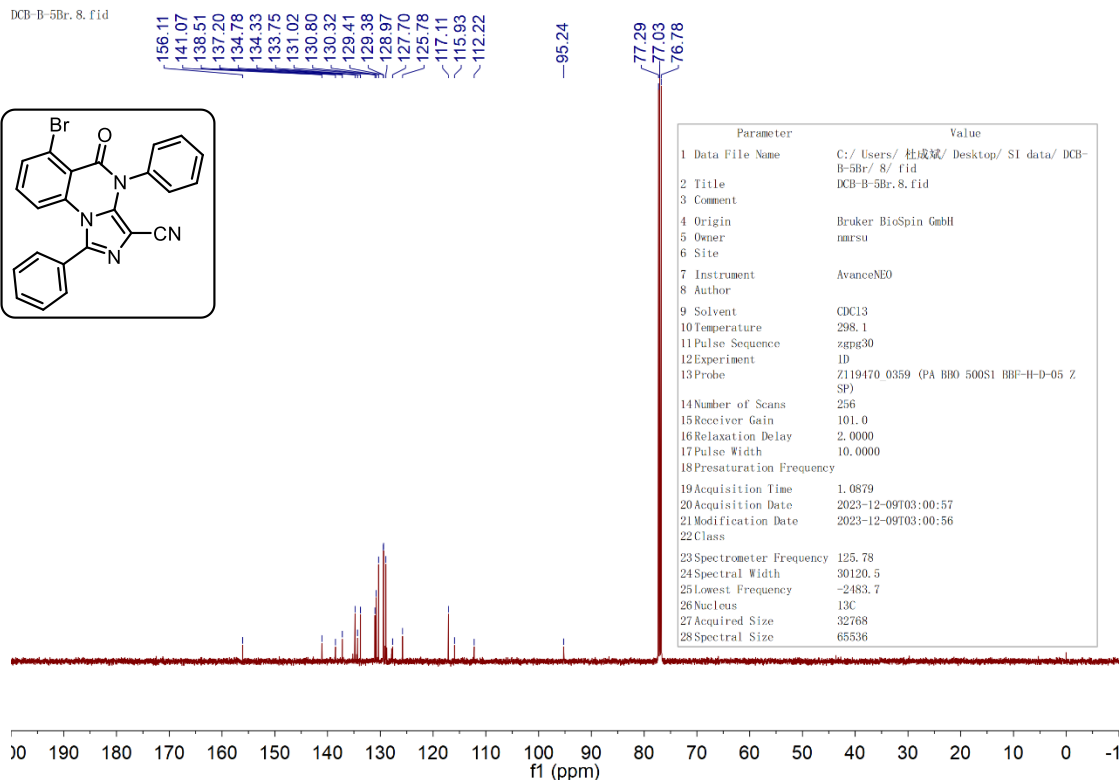

# 7-methoxy-5-oxo-1,4-diphenyl-4,5-dihydroimidazo[1,5-a]quinazoline-3-carbonitrile (4ca)

DCB-B-60Me. 1. fid

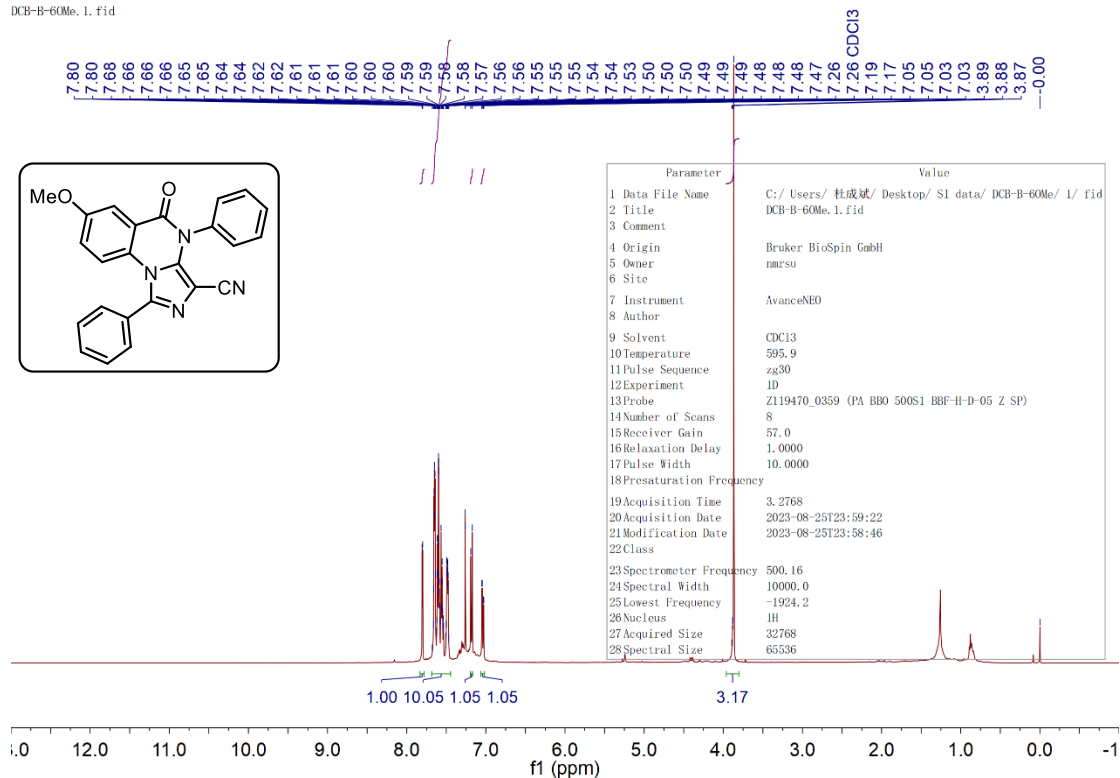

DCB-B-60Me. 2. fid

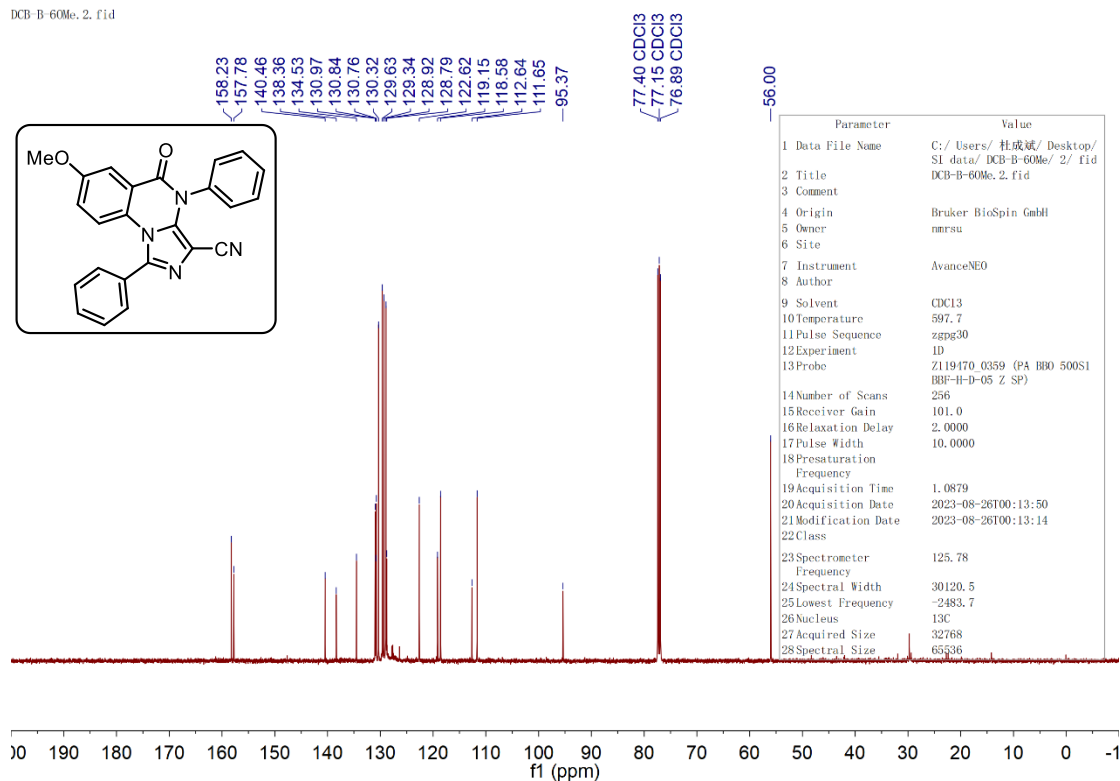



# 7-methyl-5-oxo-1,4-diphenyl-4,5-dihydroimidazo[1,5-a]quinazoline-3-carbonitrile (4da)

DCB-B-6Me.3.fid

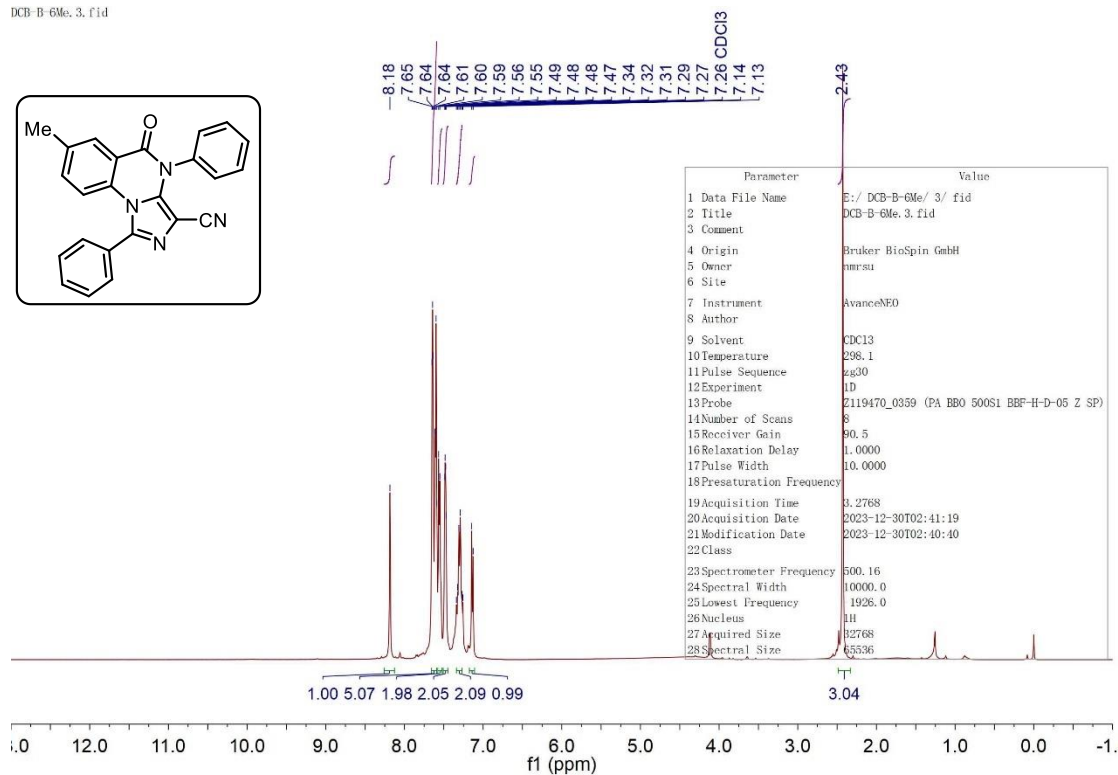

DCB-B-6Me.4.1.ir

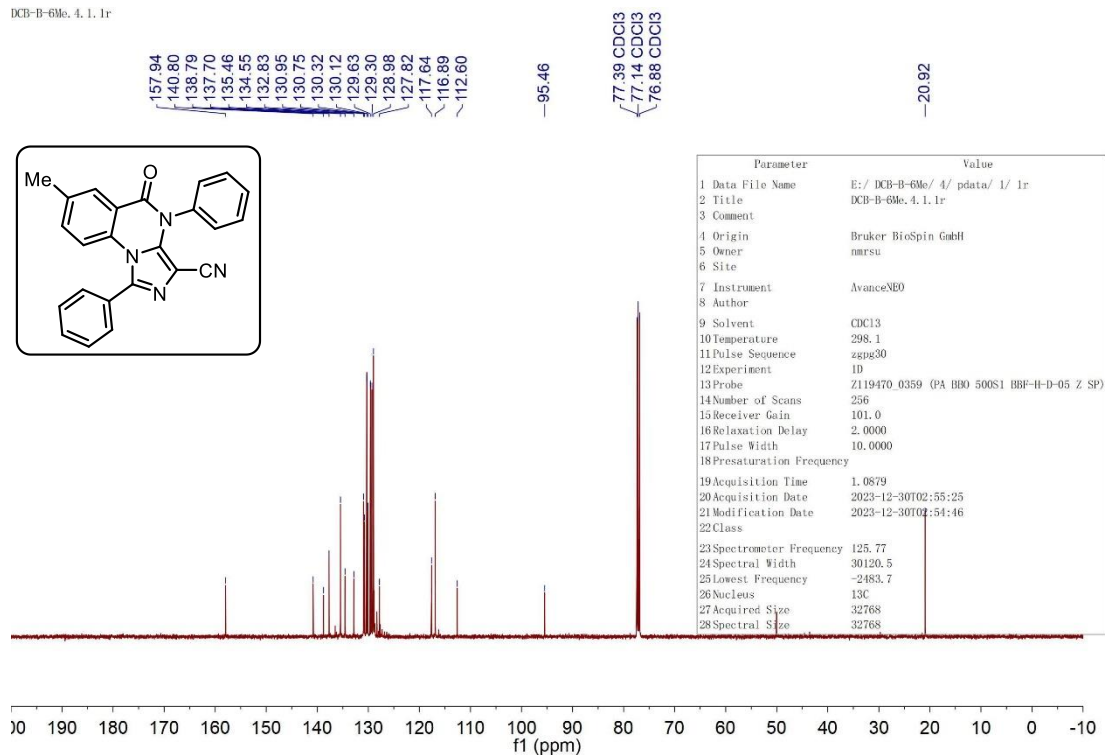

# 7-fluoro-5-oxo-1,4-diphenyl-4,5-dihydroimidazo[1,5-a]quinazoline-3-carbonitrile (4ea)

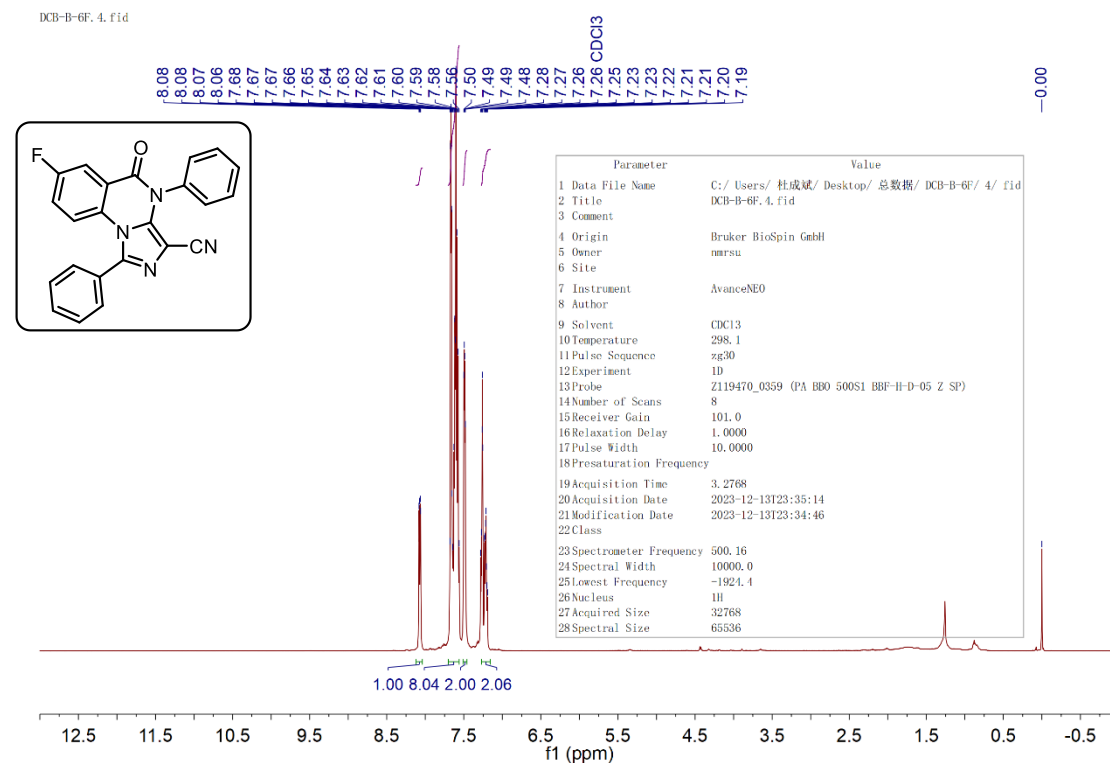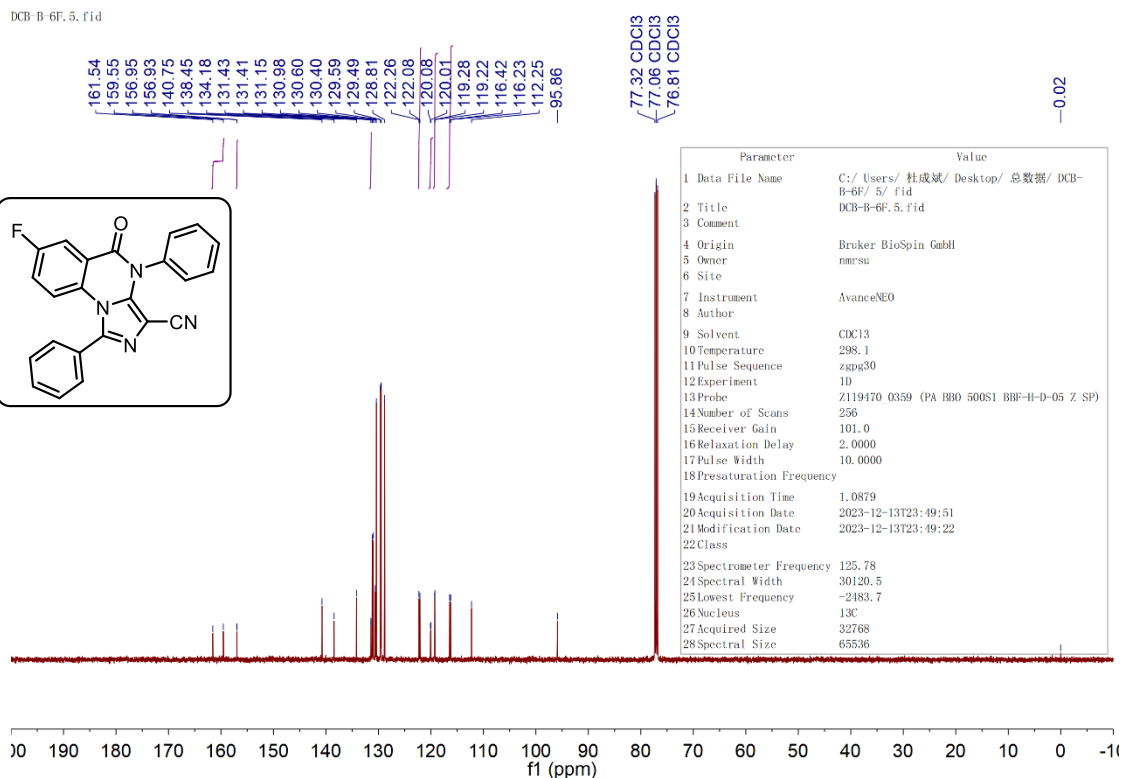

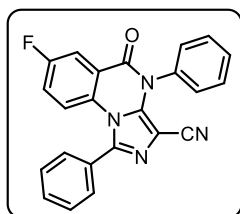

| Parameter                  | Value                                       |
|----------------------------|---------------------------------------------|
| 1 Data File Name           | C:/Users/杜成斌/Desktop/总数据/DCB-B-6F/6/fid     |
| 2 Title                    | DCB-B-6F.6.fid                              |
| 3 Comment                  |                                             |
| 4 Origin                   | Bruker BioSpin GmbH                         |
| 5 Owner                    | nmsu                                        |
| 6 Site                     |                                             |
| 7 Instrument               | AvanceNED                                   |
| 8 Author                   |                                             |
| 9 Solvent                  | CDCl3                                       |
| 10 Temperature             | 298.2                                       |
| 11 Pulse Sequence          | zgfg                                        |
| 12 Experiment              | 1D                                          |
| 13 Probe                   | Z119470_0359 (PA BB0 500SI BBF-H-D-05 Z SP) |
| 14 Number of Scans         | 16                                          |
| 15 Receiver Gain           | 101.0                                       |
| 16 Relaxation Delay        | 1.0000                                      |
| 17 Pulse Width             | 15.0000                                     |
| 18 Presaturation Frequency |                                             |
| 19 Acquisition Time        | 0.5767                                      |
| 20 Acquisition Date        | 2023-12-13T23:51:28                         |
| 21 Modification Date       | 2023-12-13T23:51:00                         |
| 22 Class                   |                                             |
| 23 Spectrometer Frequency  | 470.57                                      |
| 24 Spectral Width          | 113636.4                                    |
| 25 Lowest Frequency        | -103880.2                                   |
| 26 Nucleus                 | 19F                                         |
| 27 Acquired Size           | 65536                                       |
| 28 Spectral Size           | 131072                                      |

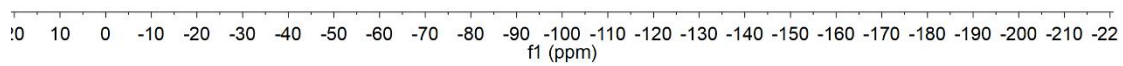

# 7-chloro-5-oxo-1,4-diphenyl-4,5-dihydroimidazo[1,5-a]quinazoline-3-carbonitrile (4fa)

DCB-B-6Cl.3.fid

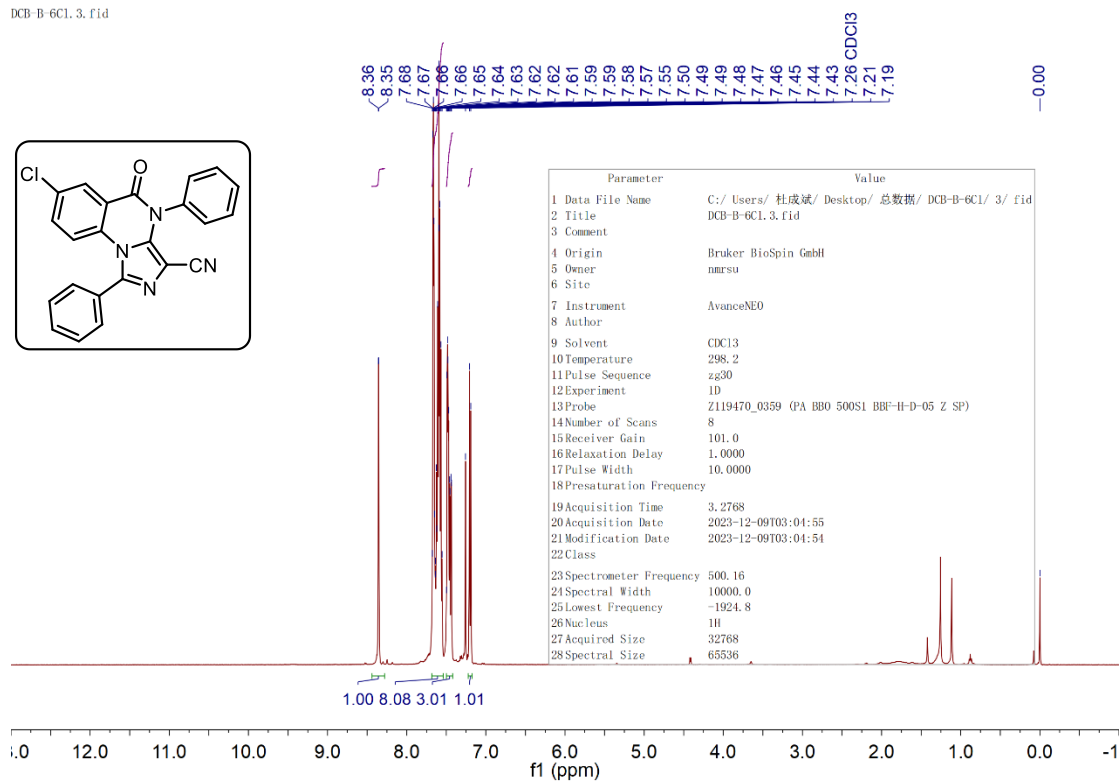

DCB-B-6Cl.4.fid

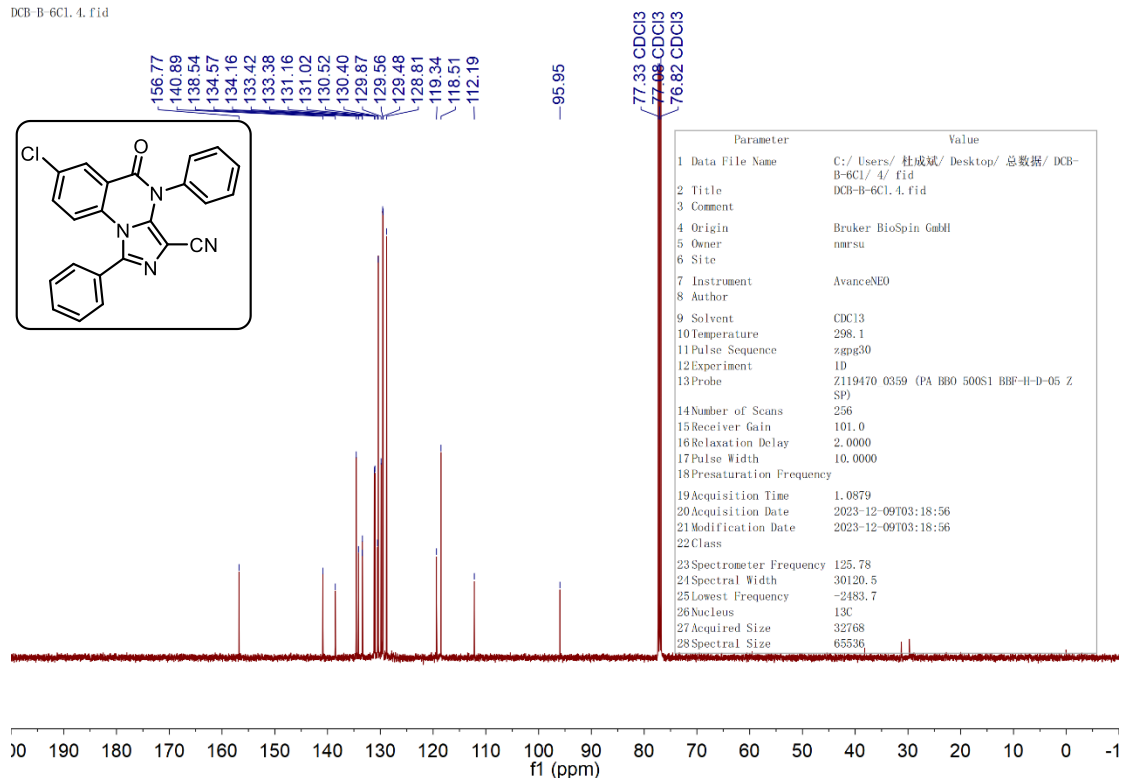

# 9-methyl-5-oxo-1,4-diphenyl-4,5-dihydroimidazo[1,5-a]quinazoline-3-carbonitrile (4ga)

DCB-B-8Me.1.fid

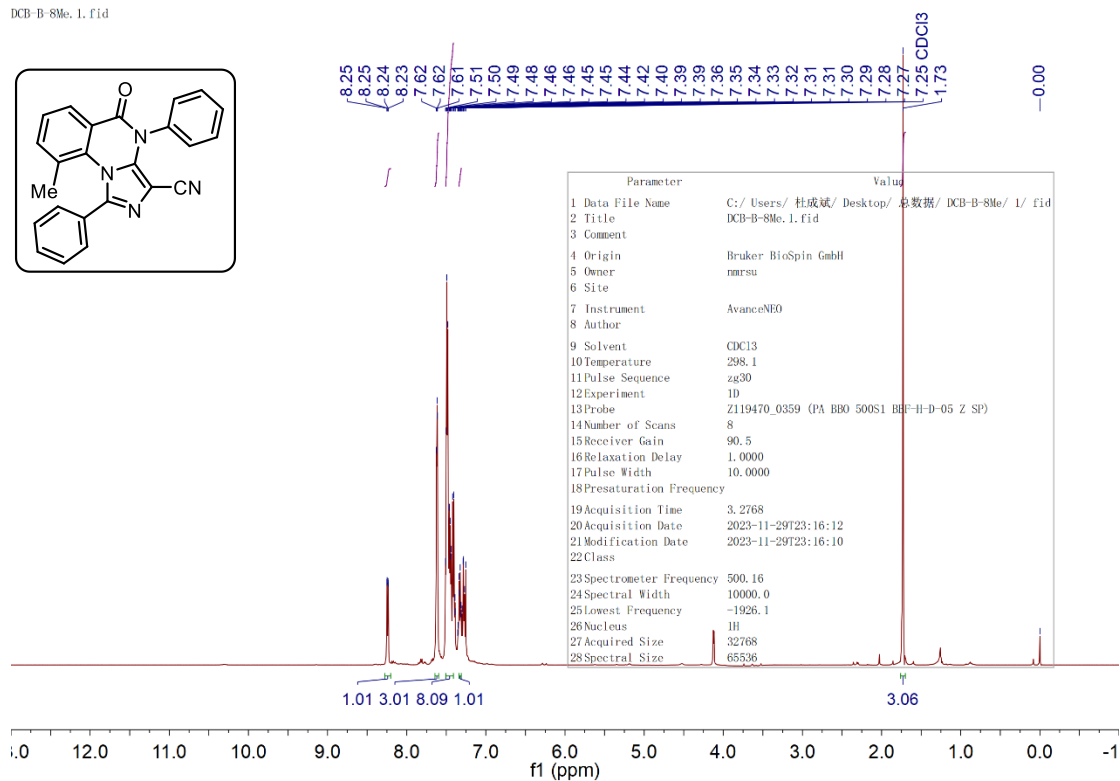

DCB-B-8Me.2.fid

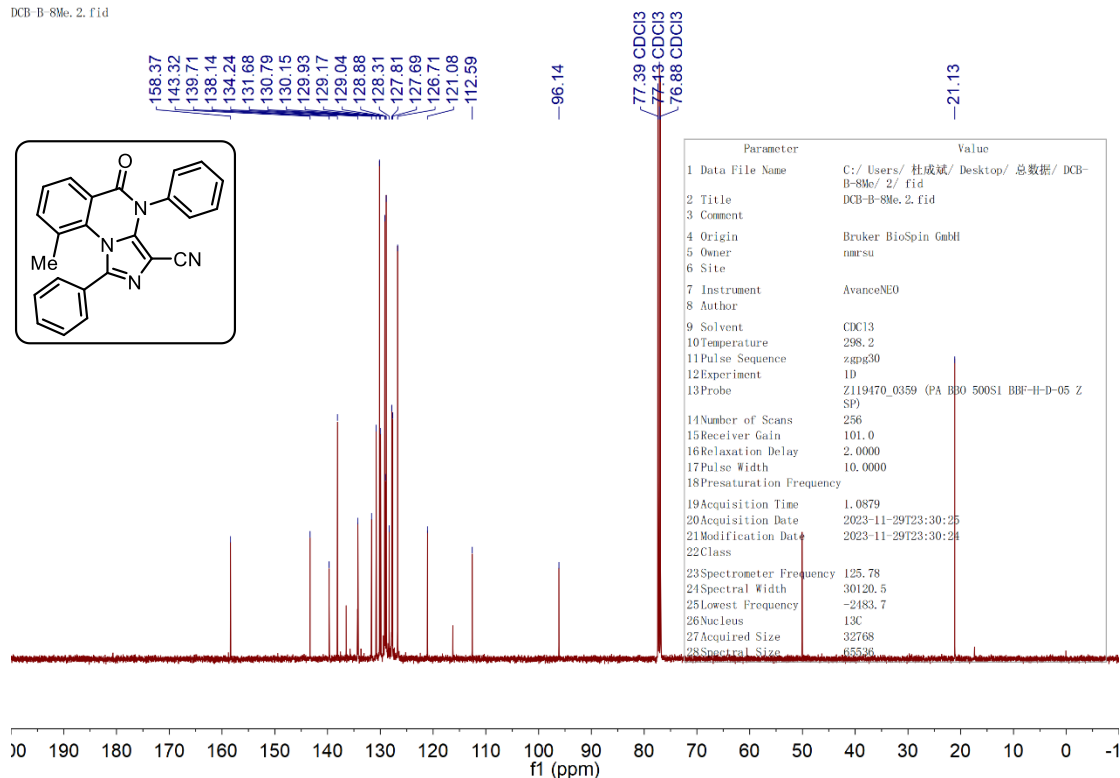

# 4-(4-methoxyphenyl)-5-oxo-1-phenyl-4,5-dihydroimidazo[1,5-a]quinazoline-3-carbonitrile (4ha)

DCB-B-pOMe.4.fid

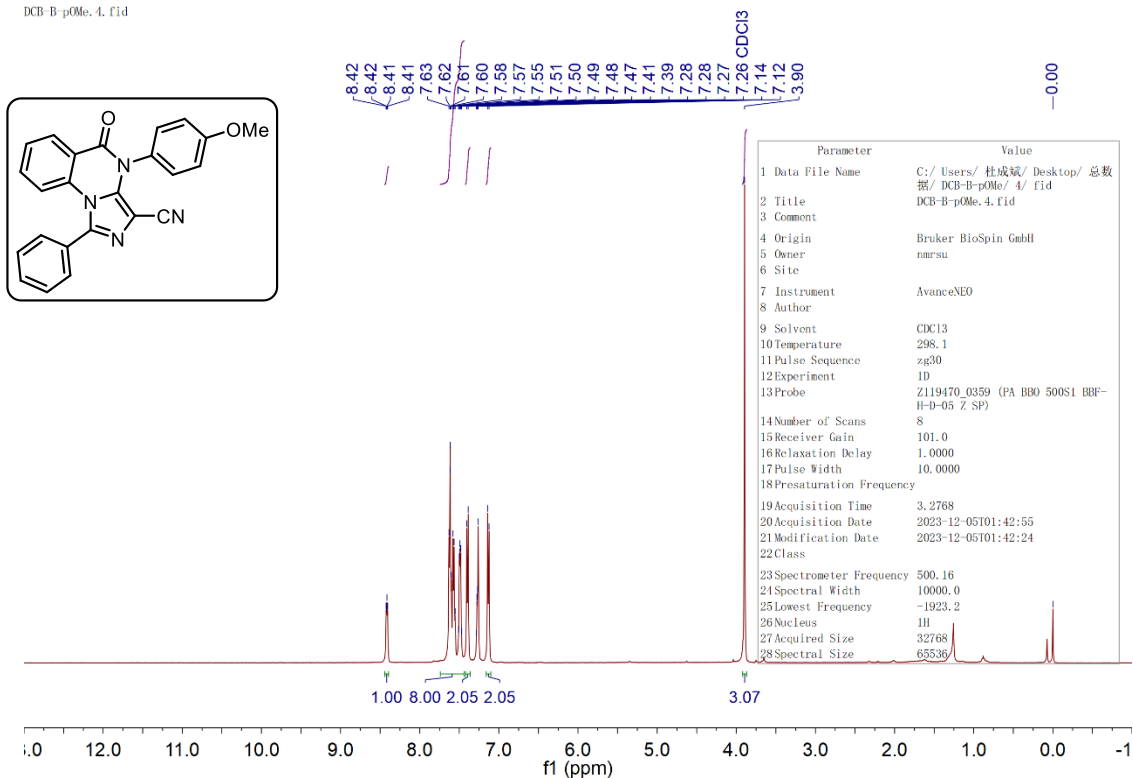

DCB-B-pOMe.5.fid

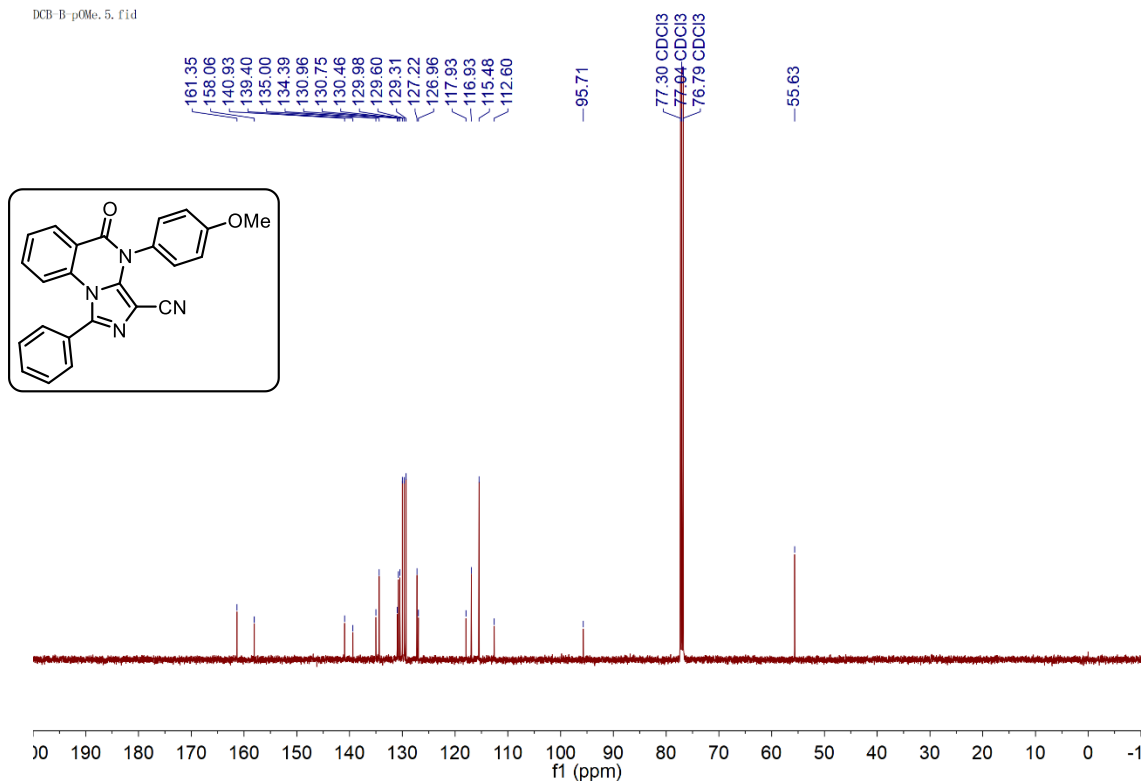

# 5-oxo-1-phenyl-4-(p-tolyl)-4,5-dihydroimidazo[1,5-a]quinazoline-3-carbonitrile (4ia)

DCB-B-pMe. 1.fid

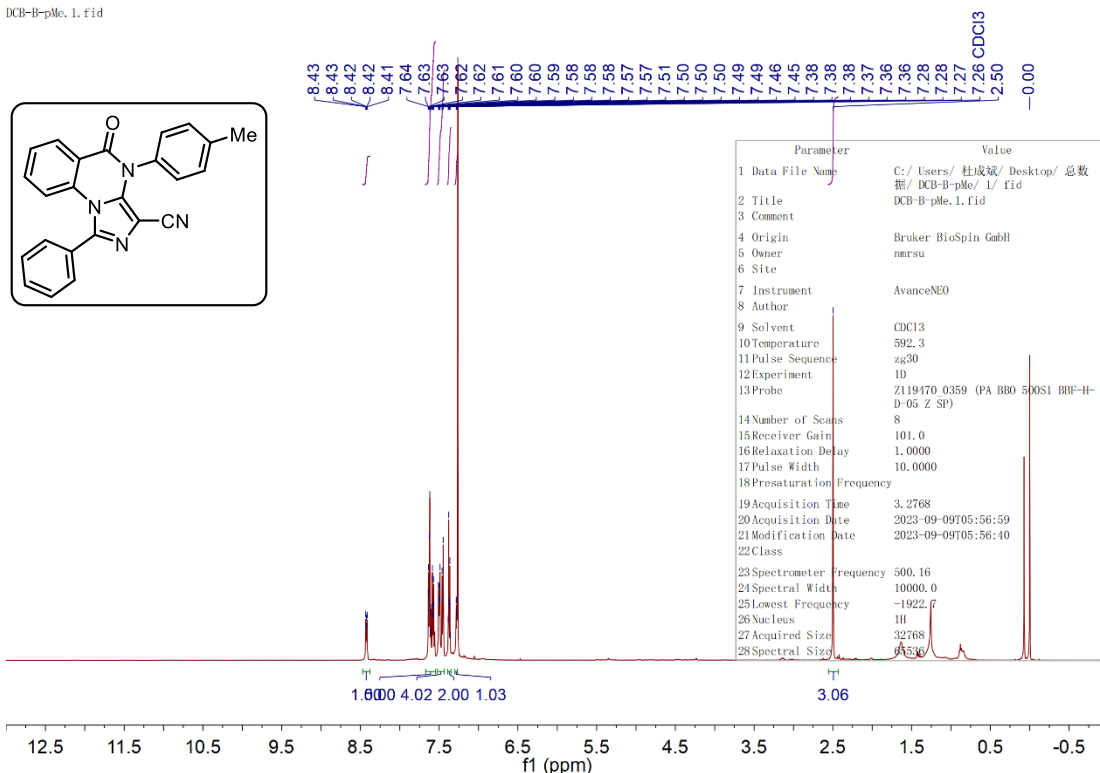

DCB-B-pMe. 2.fid

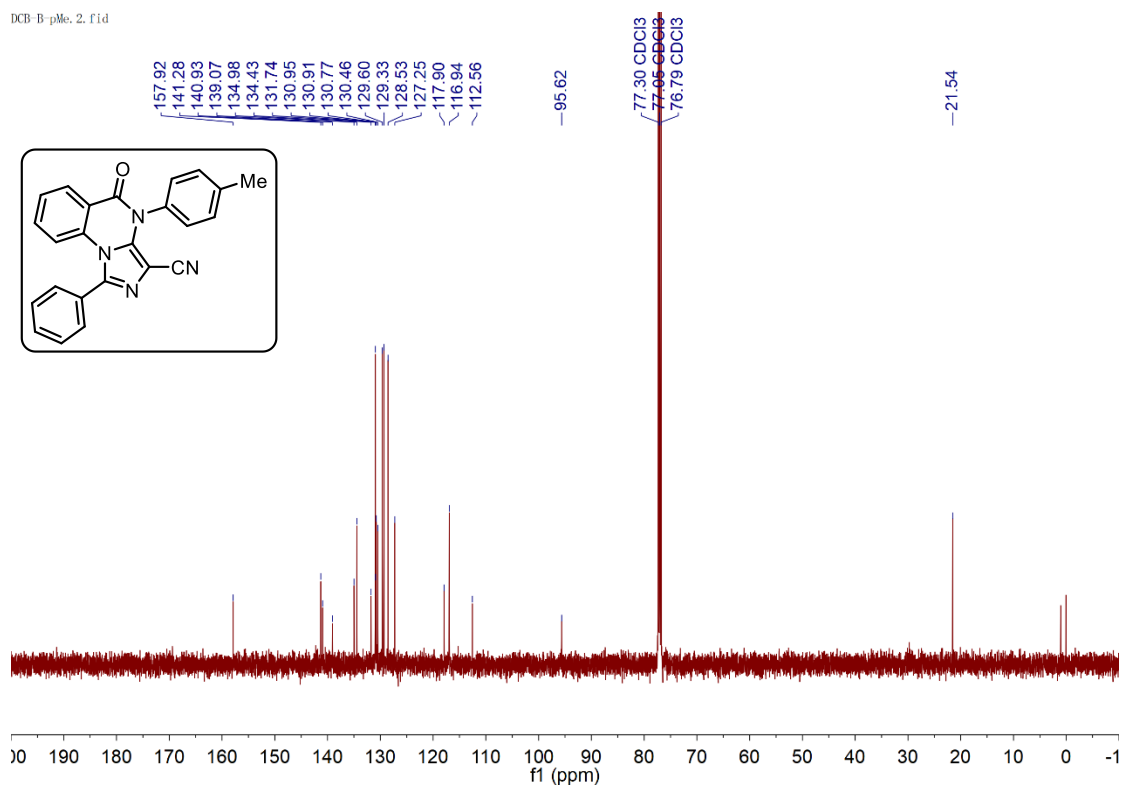

# 4-(4-fluorophenyl)-5-oxo-1-phenyl-4,5-dihydroimidazo[1,5-a]quinazoline-3-carbonitrile (4ja)

DCB-B-pF. 1. fid

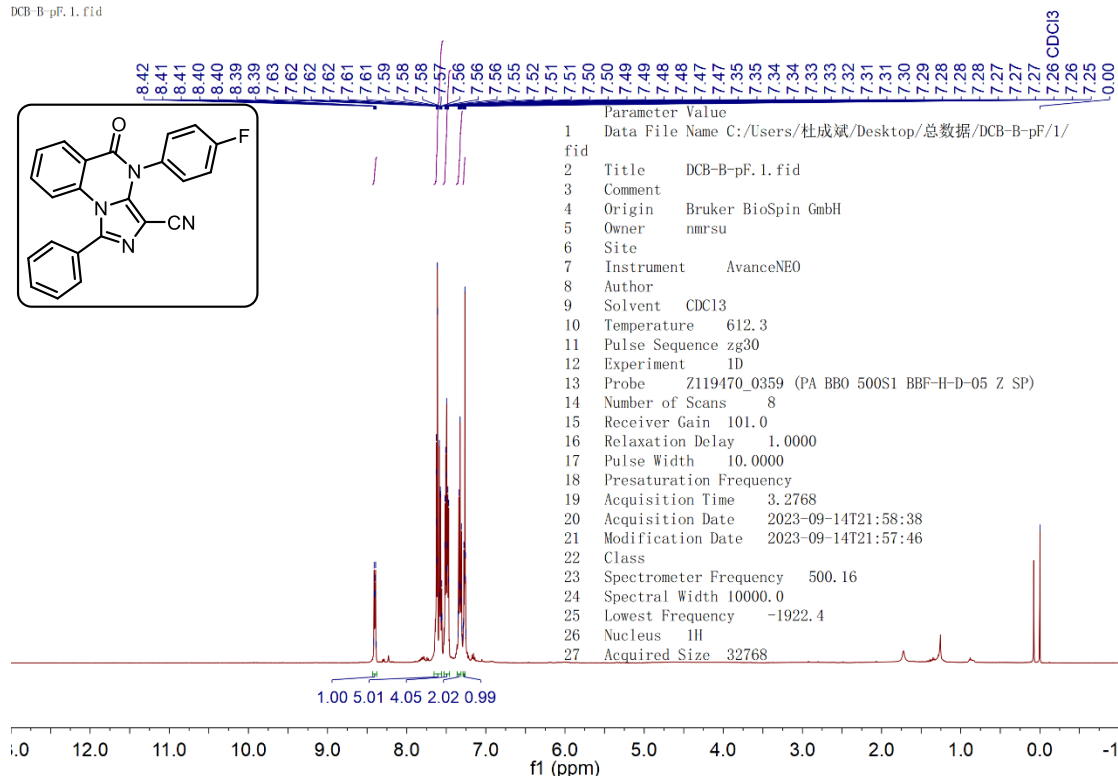

DCB-B-pF. 2. fid

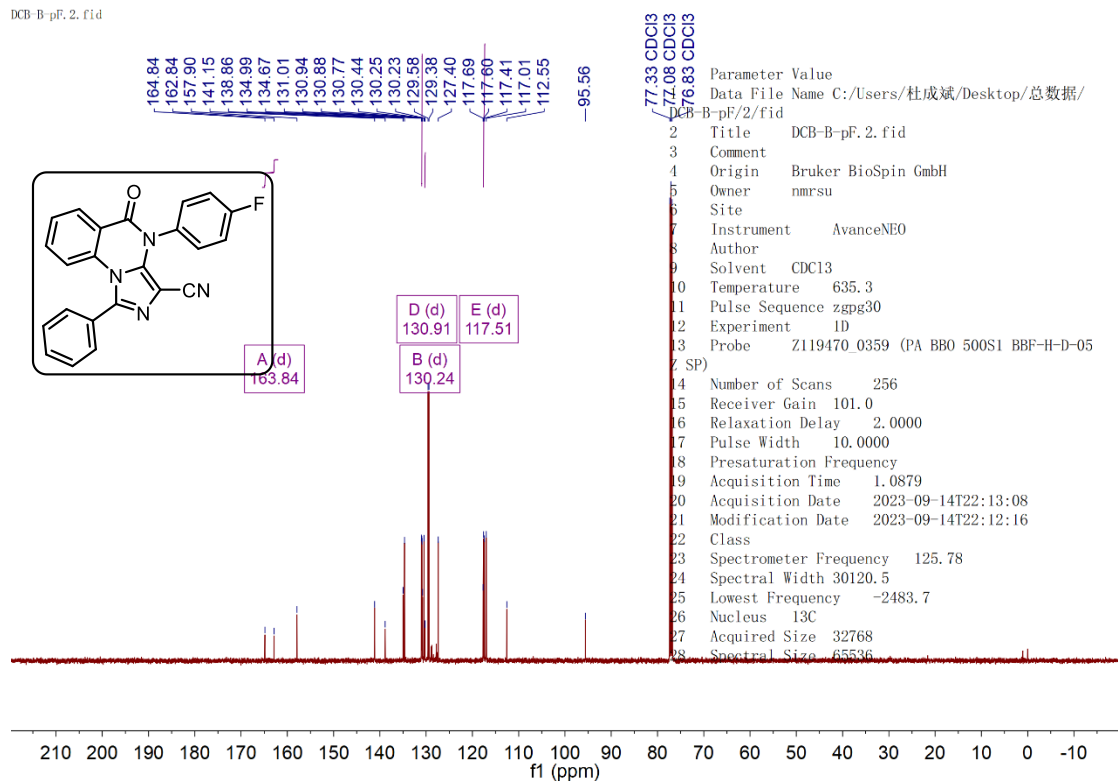



# 4-(4-chlorophenyl)-5-oxo-1-phenyl-4,5-dihydroimidazo[1,5-a]quinazoline-3-carbonitrile (4ka)

DCB-B-pCl.3.fid

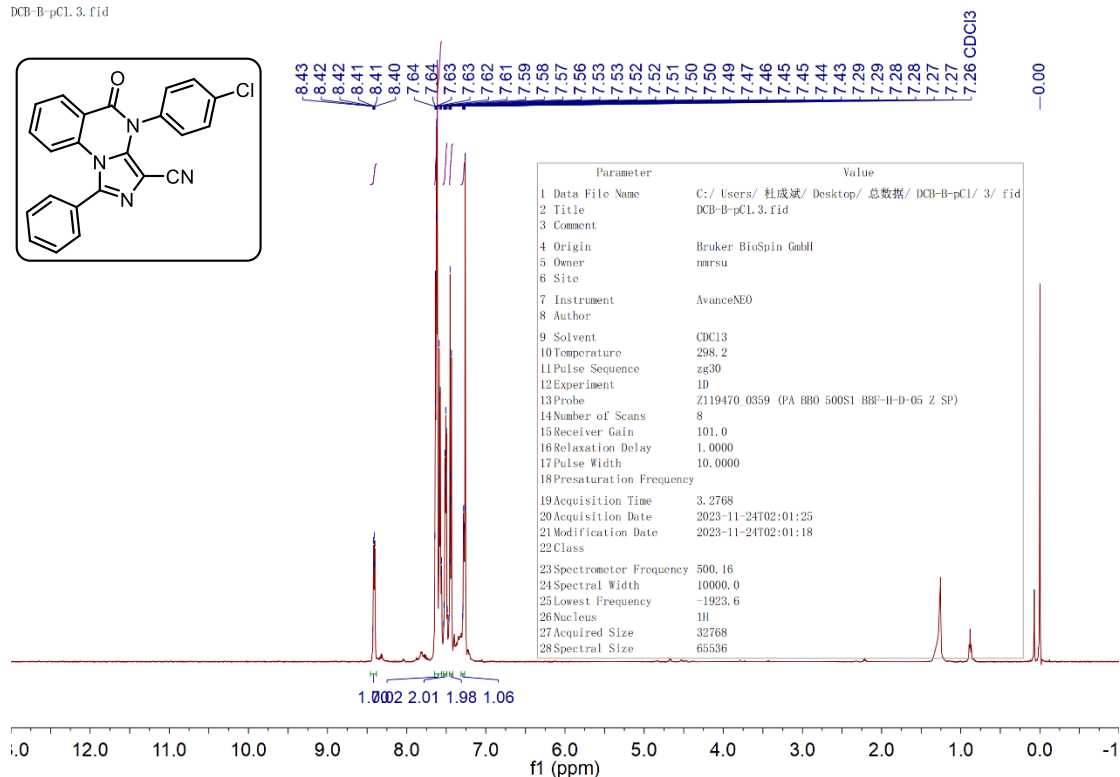

DCB-B-pCl.4.fid

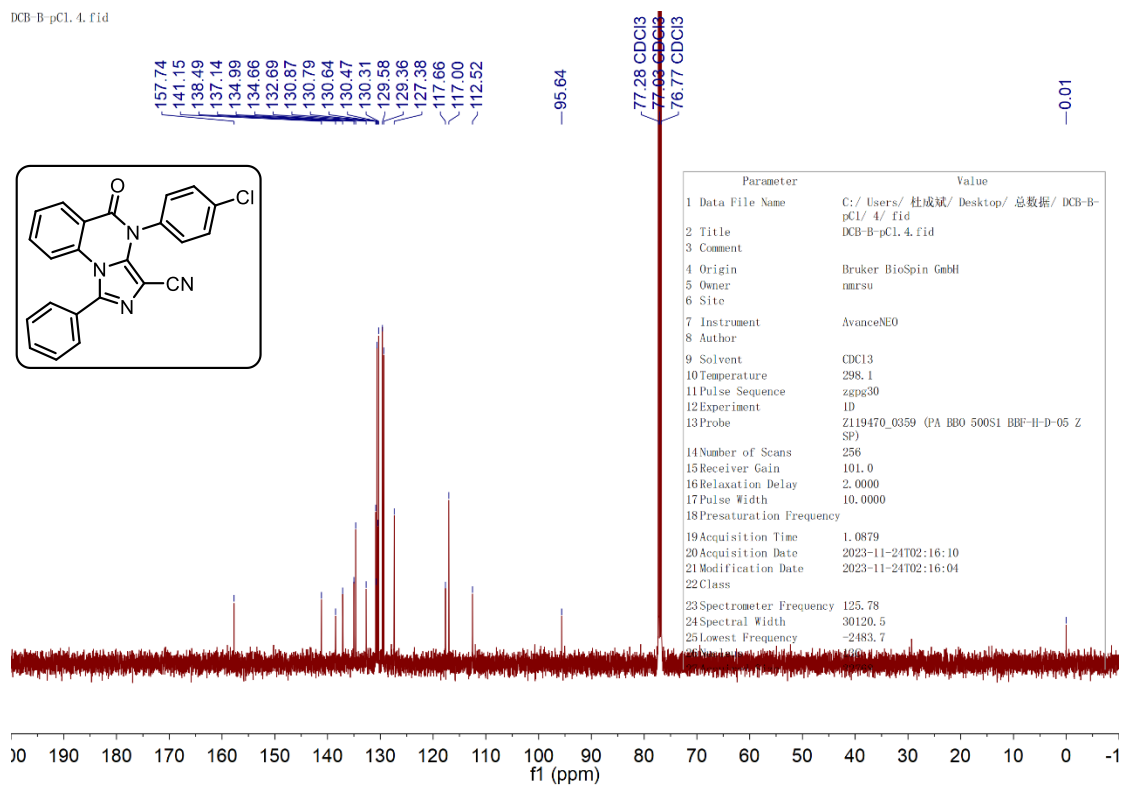

# 4-(4-bromophenyl)-5-oxo-1-phenyl-4,5-dihydroimidazo[1,5-a]quinazoline-3-carbonitrile (4la)

DCB-B-pBr.3.fid

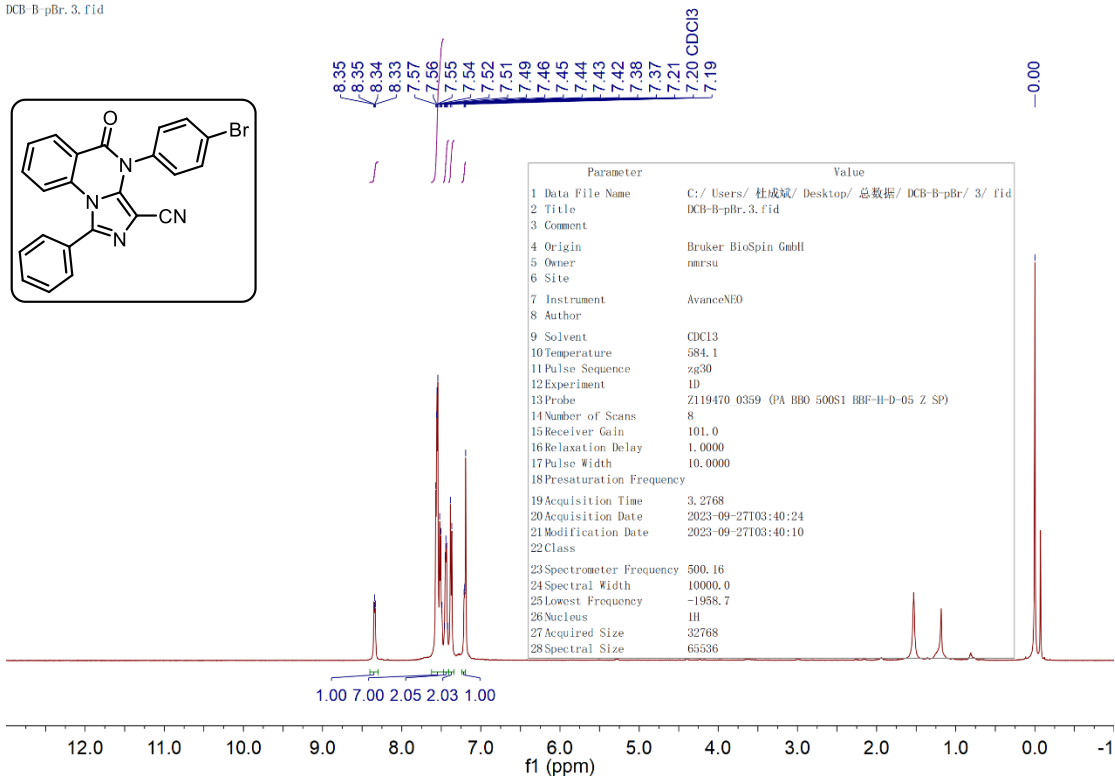

DCB-B-pBr.4.fid

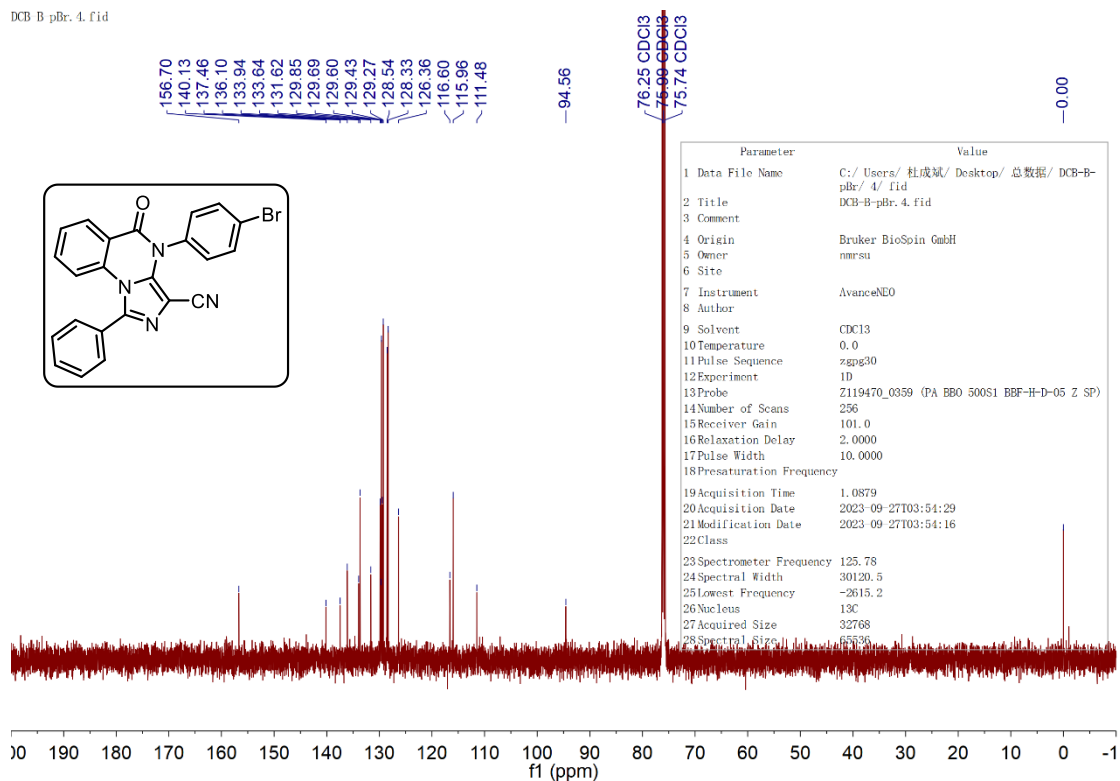

# 5-oxo-1-phenyl-4-(o-tolyl)-4,5-dihydroimidazo[1,5-a]quinazoline-3-carbonitrile (4ma)

DCB-B-orthMe.1.fid

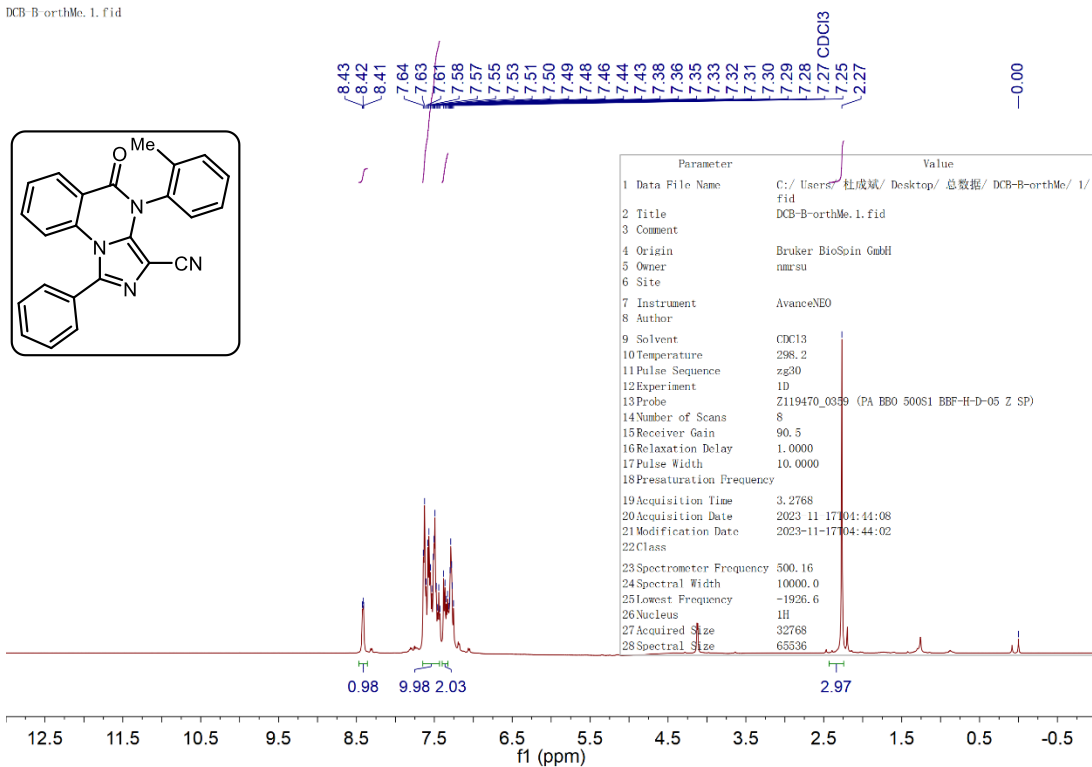

DCB-B-orthMe.2.fid

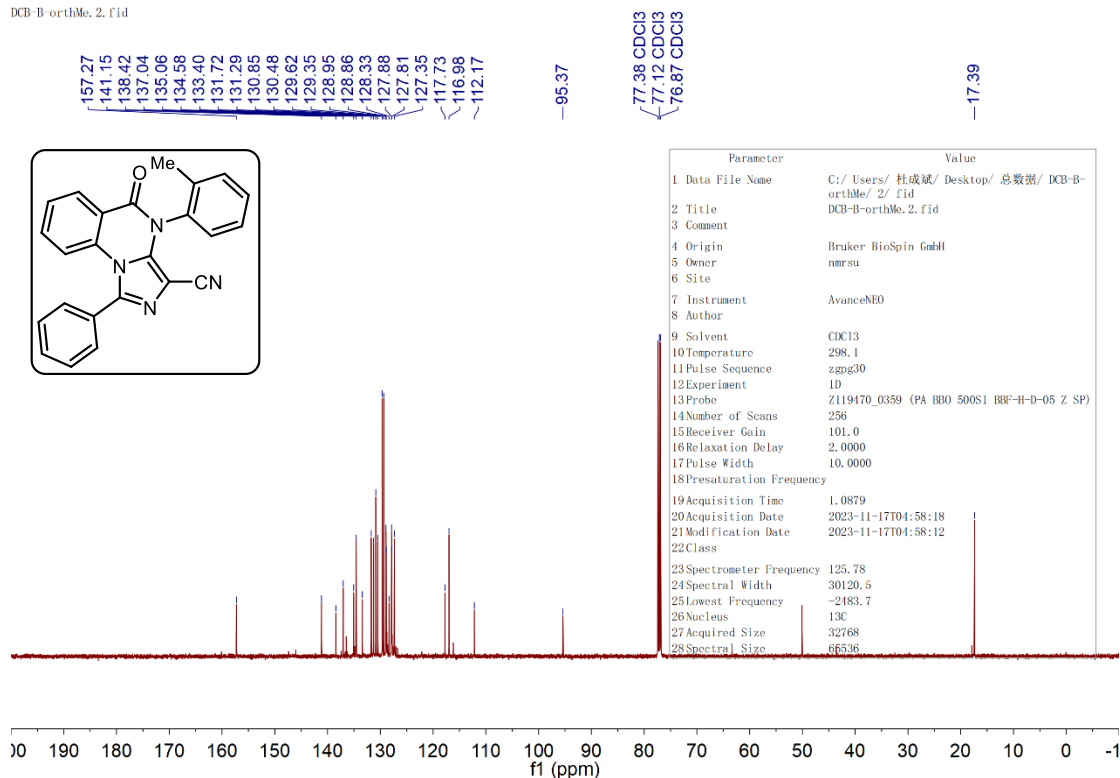

# 1-(2-methoxyphenyl)-5-oxo-4-phenyl-4,5-dihydroimidazo[1,5-a]quinazoline-3-carbonitrile (4ab)

DCB-B-20Me.3.fid

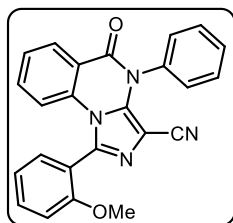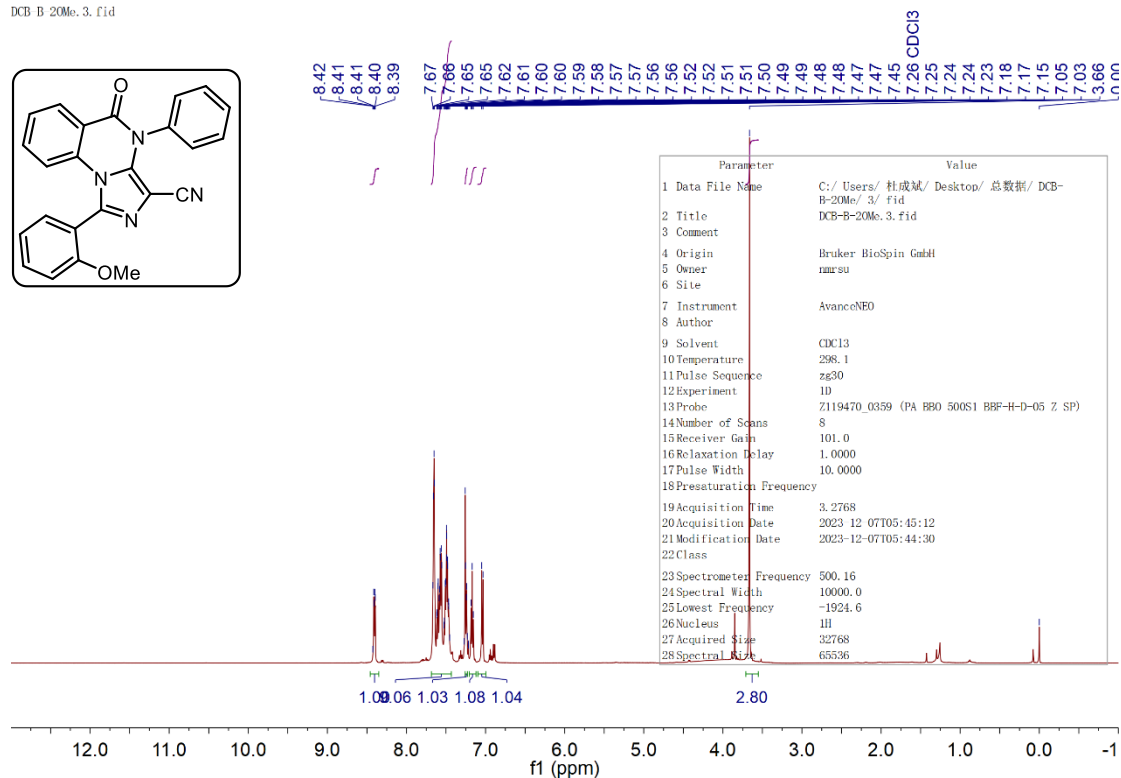

DCB-B-20Me.4.fid

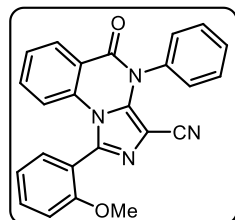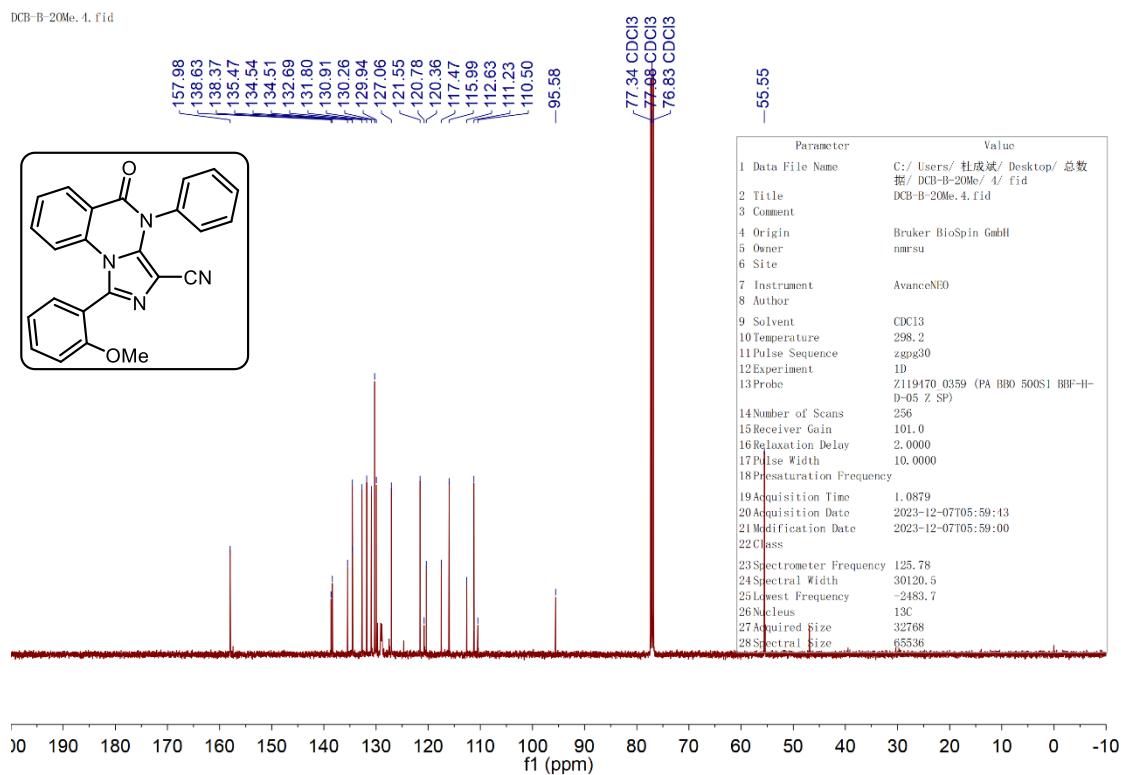

# 1-(2-chlorophenyl)-5-oxo-4-phenyl-4,5-dihydroimidazo[1,5-a]quinazoline-3-carbonitrile (4ac)

DCB-B-2Cl.3.fid

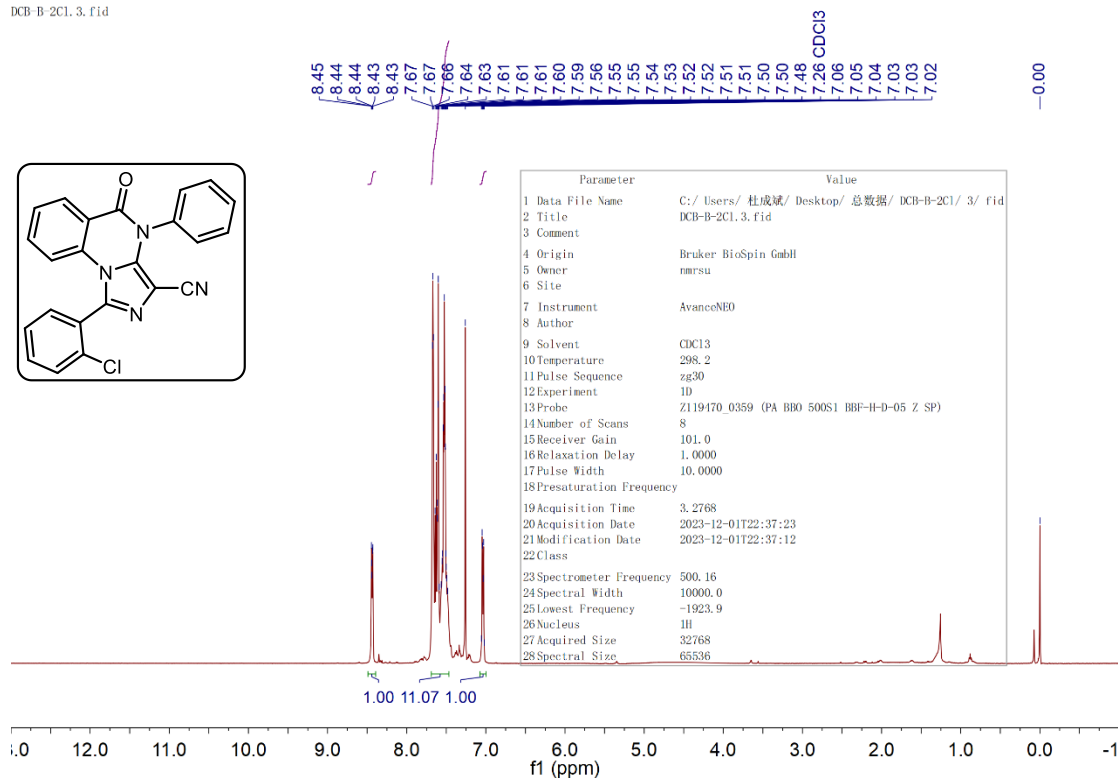

DCB-B-2Cl.4.fid

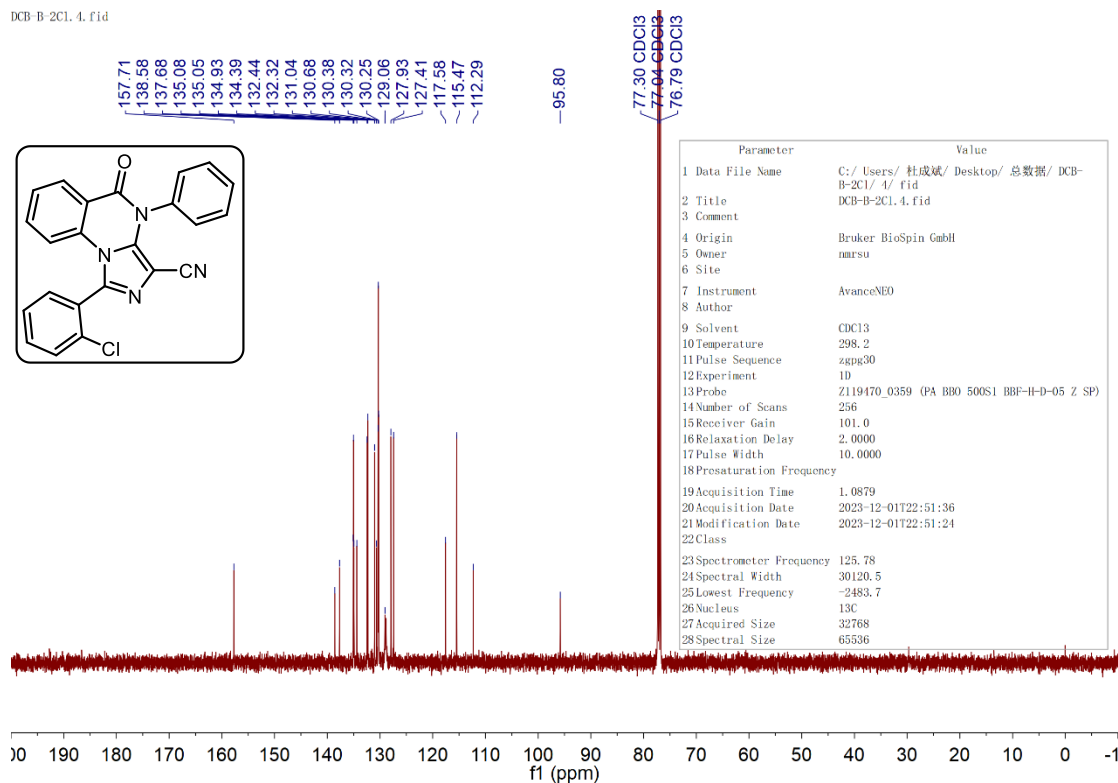

# 1-(3-chlorophenyl)-5-oxo-4-phenyl-4,5-dihydroimidazo[1,5-a]quinazoline-3-carbonitrile (4ad)

DCB-B-3Cl.1.fid

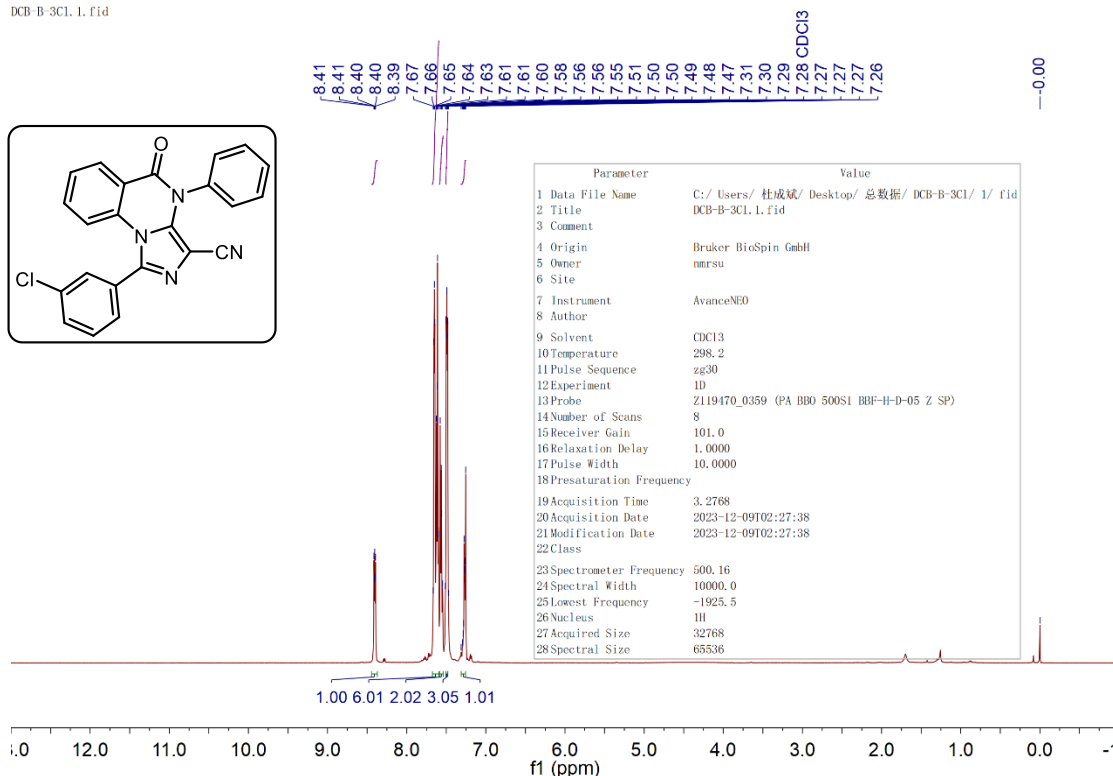

DCB-B-3Cl.2.fid

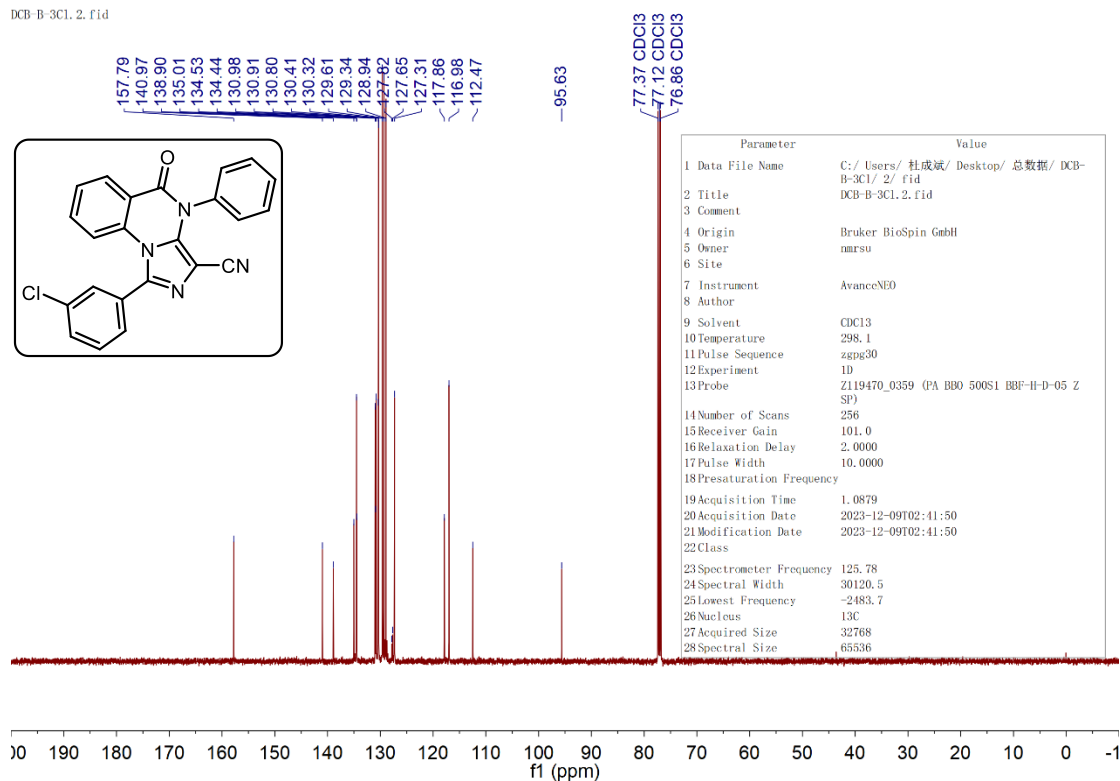

# 1-(4-methoxyphenyl)-5-oxo-4-phenyl-4,5-dihydroimidazo[1,5-a]quinazoline-3-carbonitrile (4ae)

DCB-B-40Me. 1. fid

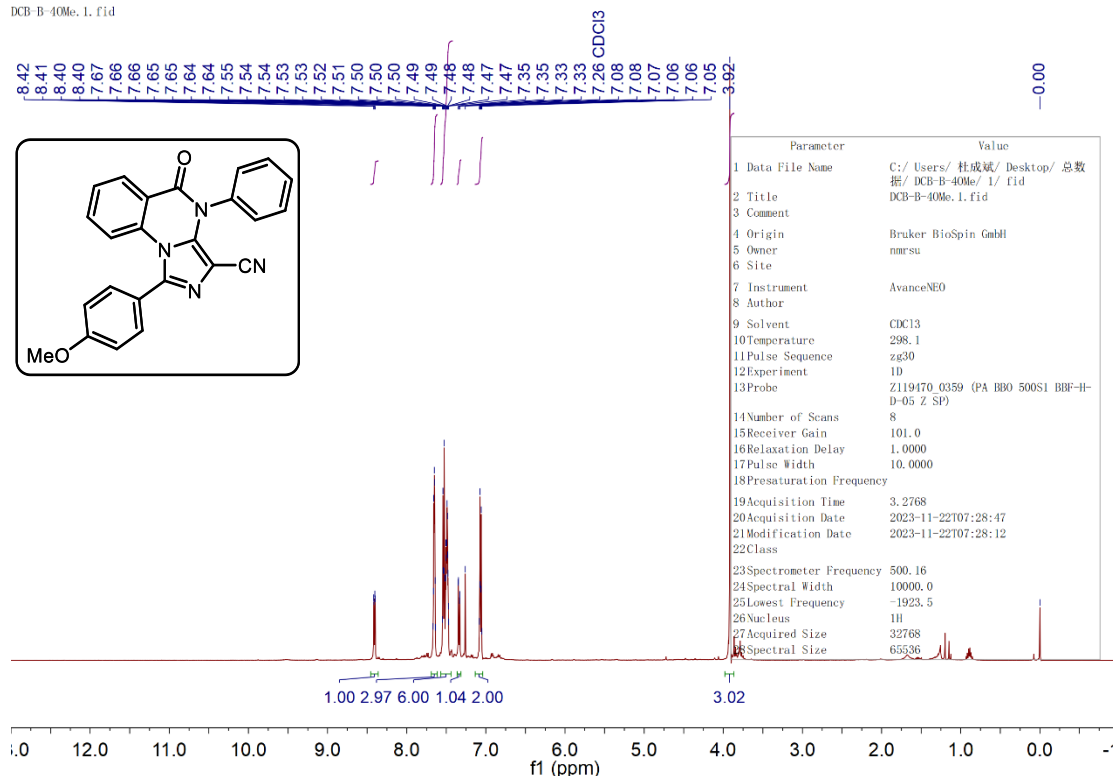

DCB-B-40Me. 2. fid

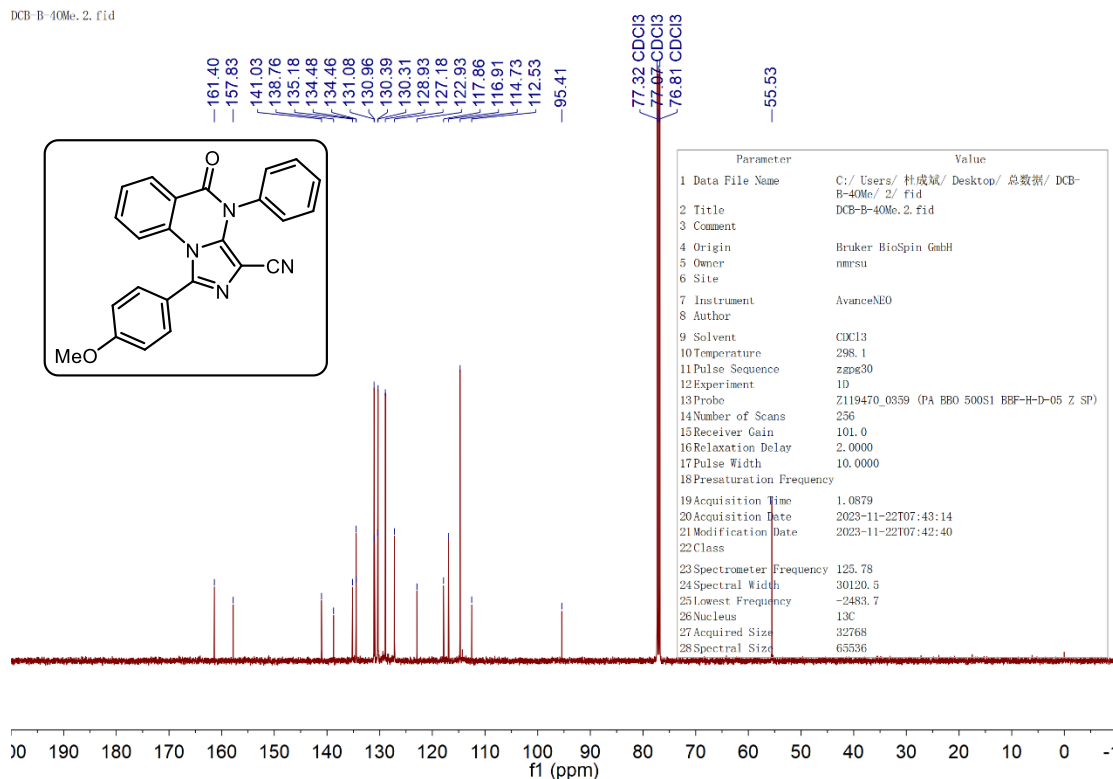

# 5-oxo-4-phenyl-1-(4-(trifluoromethyl)phenyl)-4,5-dihydroimidazo[1,5-a]quinazoline-3-carbonitrile (4af)

DCB-B-4CF3.1.fid

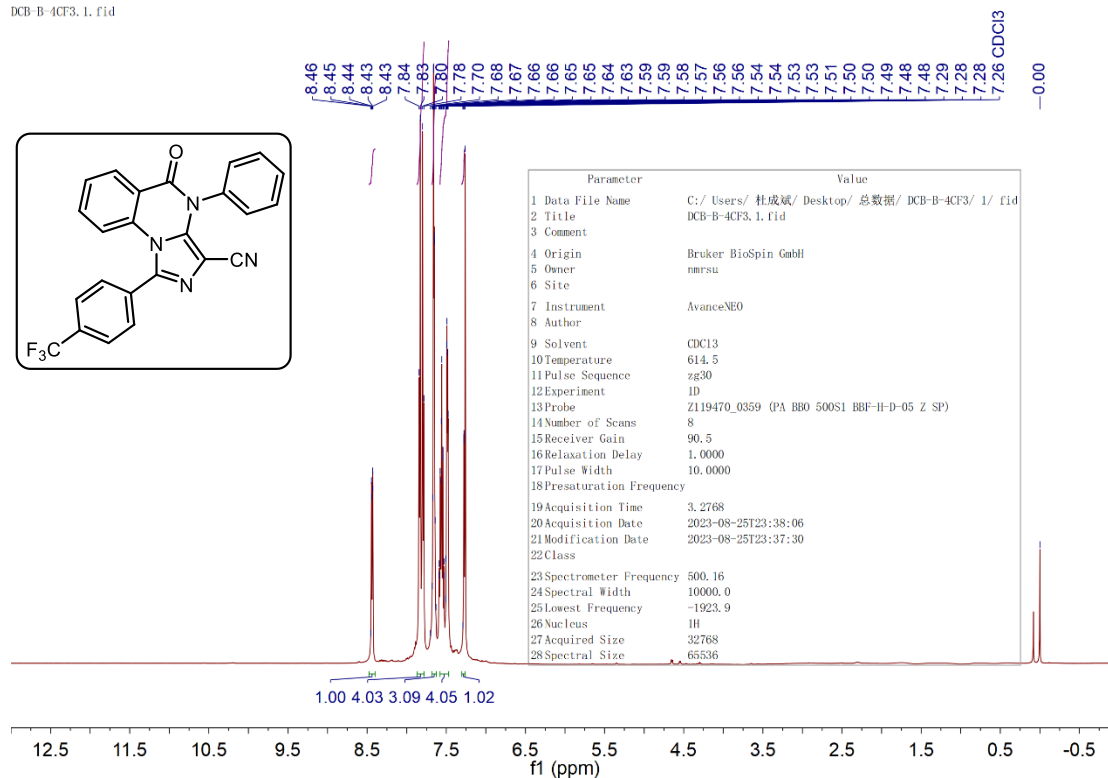

DCB-A-4CF3.2.fid

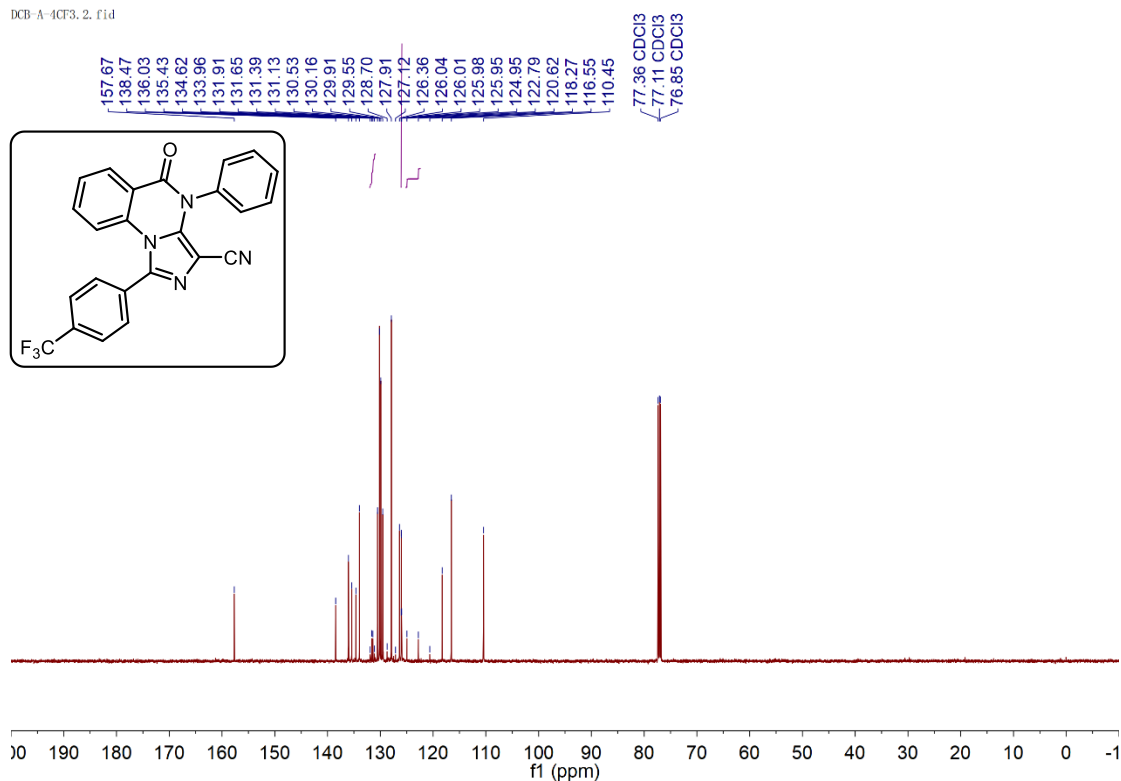



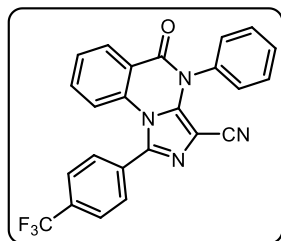

| Parameter                  | Value                                       |
|----------------------------|---------------------------------------------|
| 1 Data File Name           | C:/Users/杜成斌/Desktop/总数据/DCB-B-4CF3/3/fid   |
| 2 Title                    | DCB-B-4CF3.3.fid                            |
| 3 Comment                  |                                             |
| 4 Origin                   | Bruker BioSpin GmbH                         |
| 5 Owner                    | mrsu                                        |
| 6 Site                     |                                             |
| 7 Instrument               | AvanceNEO                                   |
| 8 Author                   |                                             |
| 9 Solvent                  | CDCl3                                       |
| 10 Temperature             | 612.3                                       |
| 11 Pulse Sequence          | zgig                                        |
| 12 Experiment              | 1D                                          |
| 13 Probe                   | Z119470.0359 (PA BBO 500S1 BBF-H-D-05 Z SP) |
| 14 Number of Scans         | 16                                          |
| 15 Receiver Gain           | 101.0                                       |
| 16 Relaxation Delay        | 1.0000                                      |
| 17 Pulse Width             | 15.0000                                     |
| 18 Presaturation Frequency |                                             |
| 19 Acquisition Time        | 0.5767                                      |
| 20 Acquisition Date        | 2023-08-25T23:54:19                         |
| 21 Modification Date       | 2023-08-25T23:53:42                         |
| 22 Class                   |                                             |
| 23 Spectrometer Frequency  | 470.57                                      |
| 24 Spectral Width          | 113636.4                                    |
| 25 Lowest Frequency        | -103880.2                                   |
| 26 Nucleus                 | 19F                                         |
| 27 Acquired Size           | 65536                                       |
| 28 Spectral Size           | 131072                                      |

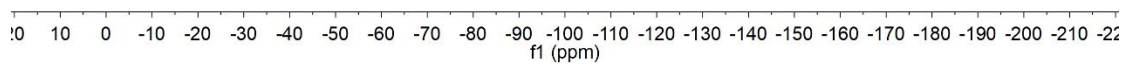

# 1-(4-fluorophenyl)-5-oxo-4-phenyl-4,5-dihydroimidazo[1,5-a]quinazoline-3-carbonitrile (4ag)

DCB-B-4F.4.fid

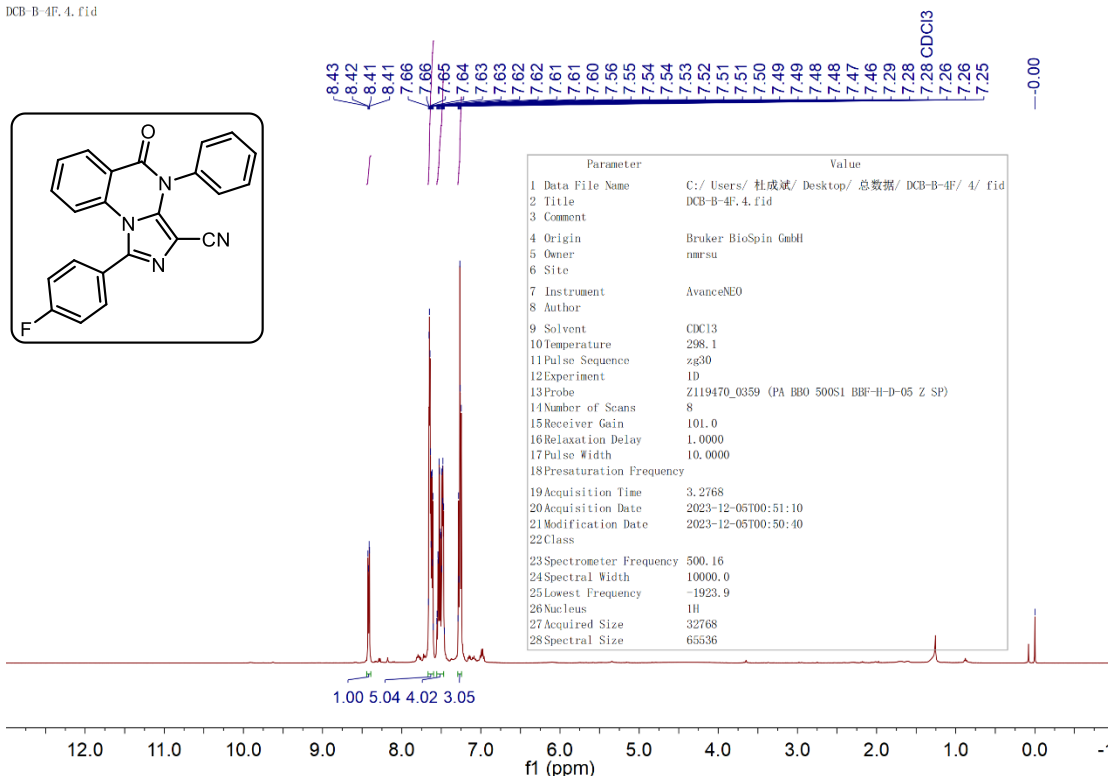

DCB-B-4F.5.fid

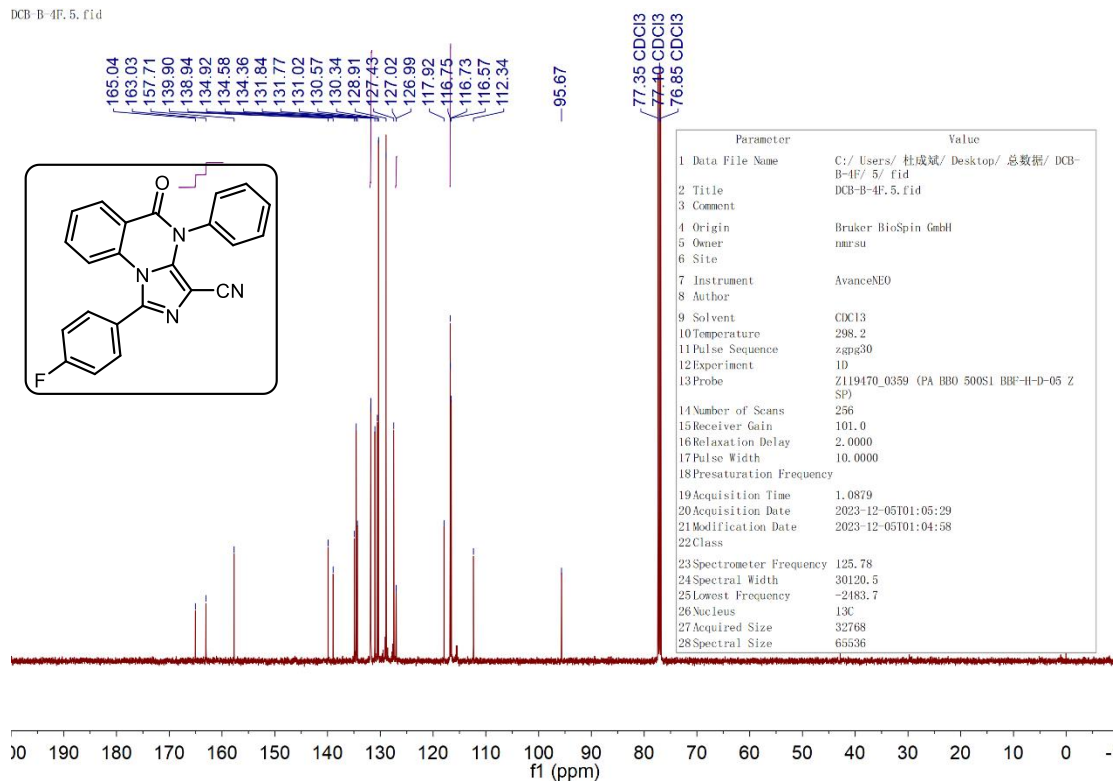

DCB B 4F. 3. fid

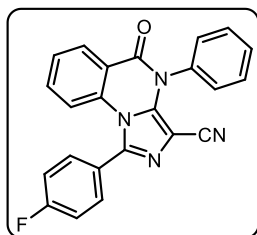

--108.21

| Parameter                  | Value                                       |
|----------------------------|---------------------------------------------|
| 1 Data File Name           | C:/Users/杜成斌/Desktop/总数据/DCB-B-4F/3/ fid    |
| 2 Title                    | DCB B 4F. 3. fid                            |
| 3 Comment                  |                                             |
| 4 Origin                   | Bruker BioSpin GmbH                         |
| 5 Owner                    | nursu                                       |
| 6 Site                     |                                             |
| 7 Instrument               | AvanceNEO                                   |
| 8 Author                   |                                             |
| 9 Solvent                  | CDCl3                                       |
| 10 Temperature             | 0.0                                         |
| 11 Pulse Sequence          | zgig                                        |
| 12 Experiment              | 1D                                          |
| 13 Probe                   | Z119470_0359 (PA BB0 500S1 BBF-H-D-05 Z SP) |
| 14 Number of Scans         | 16                                          |
| 15 Receiver Gain           | 101.0                                       |
| 16 Relaxation Delay        | 1.0000                                      |
| 17 Pulse Width             | 15.0000                                     |
| 18 Presaturation Frequency |                                             |
| 19 Acquisition Time        | 0.5767                                      |
| 20 Acquisition Date        | 2023-09-09T07:09:45                         |
| 21 Modification Date       | 2023-09-09T07:09:26                         |
| 22 Class                   |                                             |
| 23 Spectrometer Frequency  | 470.57                                      |
| 24 Spectral Width          | 113636.4                                    |
| 25 Lowest Frequency        | -103880.2                                   |
| 26 Nucleus                 | 19F                                         |
| 27 Acquired Size           | 65336                                       |
| 28 Spectral Size           | 131072                                      |

10 0 -10 -20 -30 -40 -50 -60 -70 -80 -90 -100 -110 -120 -130 -140 -150 -160 -170 -180 -190 -200 -210 -220  
f1 (ppm)

# 1-(4-chlorophenyl)-5-oxo-4-phenyl-4,5-dihydroimidazo[1,5-a]quinazoline-3-carbonitrile (4ah)

DCB-B-4Cl.3.fid

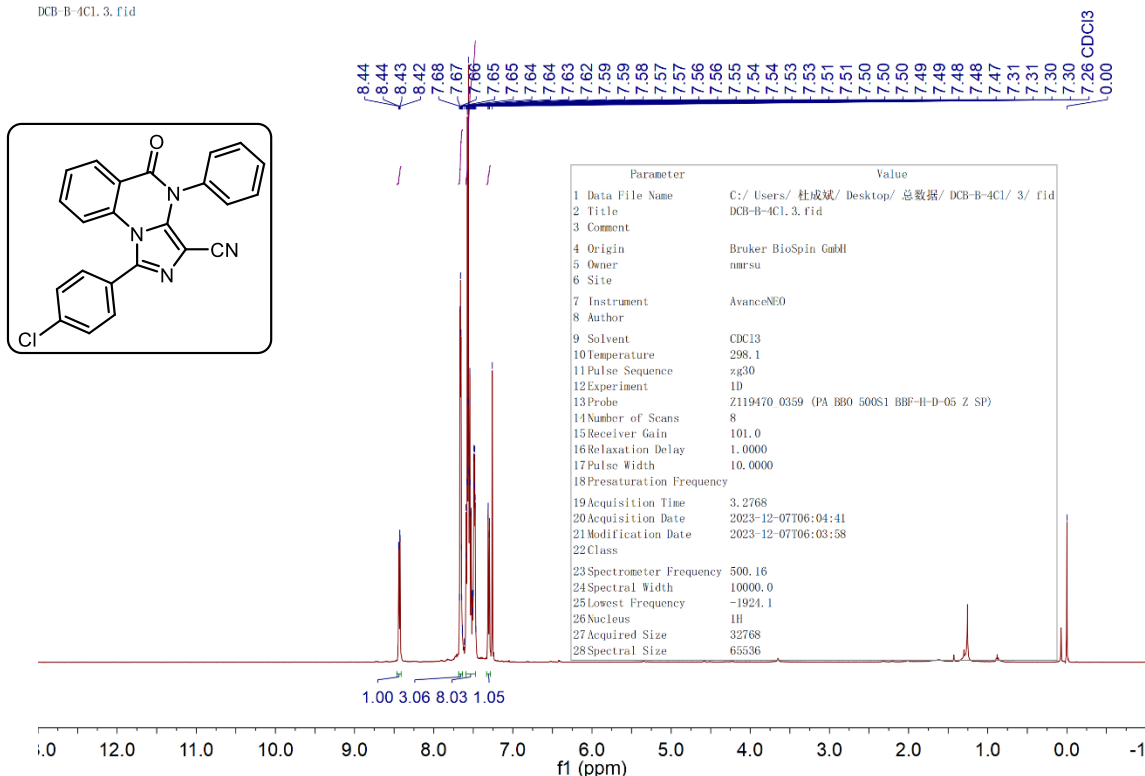

DCB-B-4Cl.4.fid

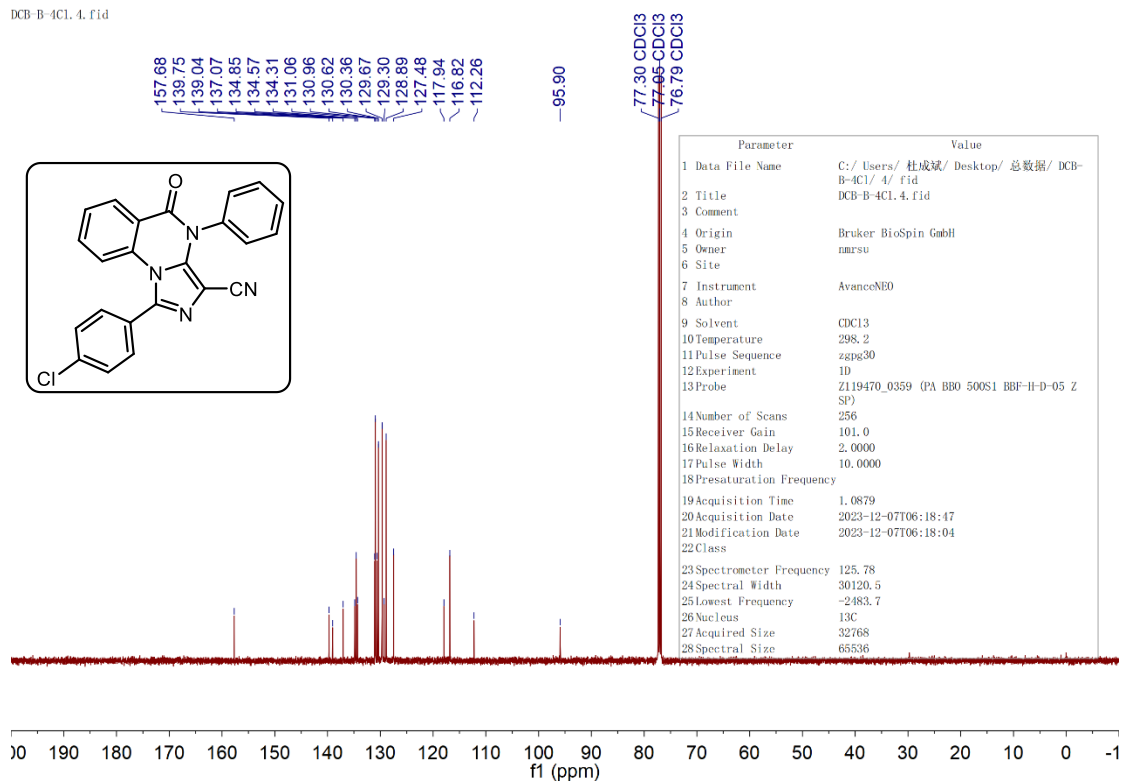

# 5-oxo-4-phenyl-1-(thiophen-2-yl)-4,5-dihydroimidazo[1,5-a]quinazoline-3-carbonitrile (4ai)

DCB-B-Thio.3.fid

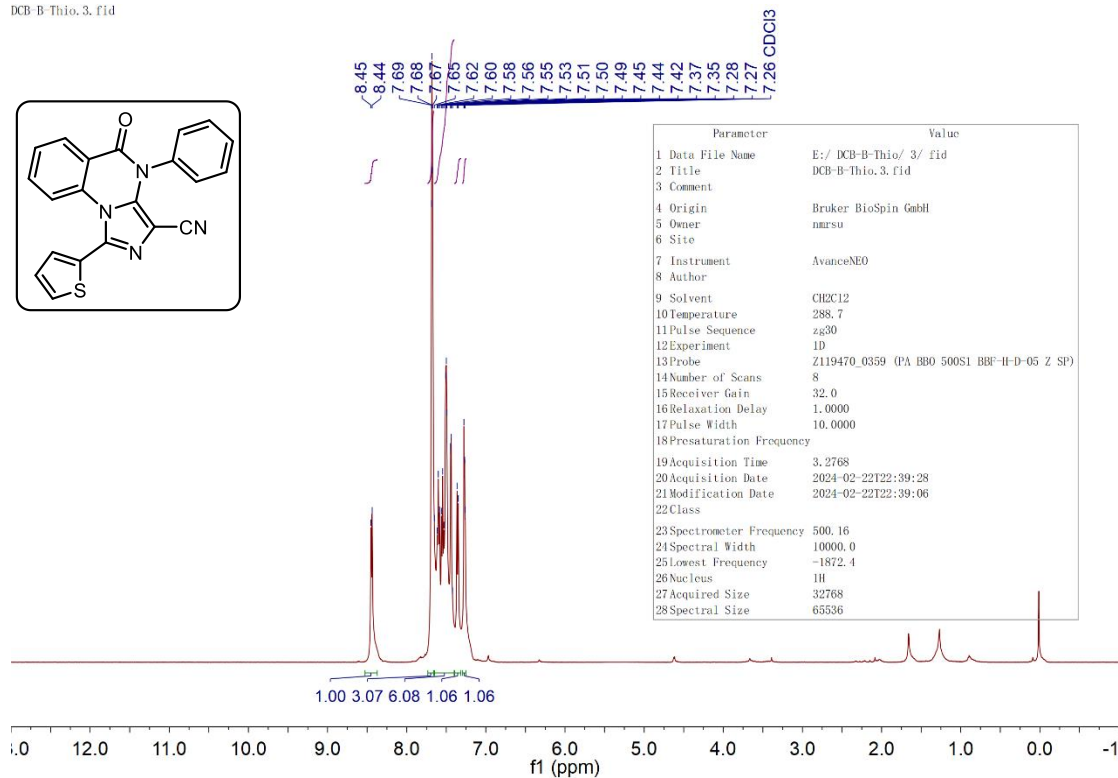

DCB-B-Thio.4.fid

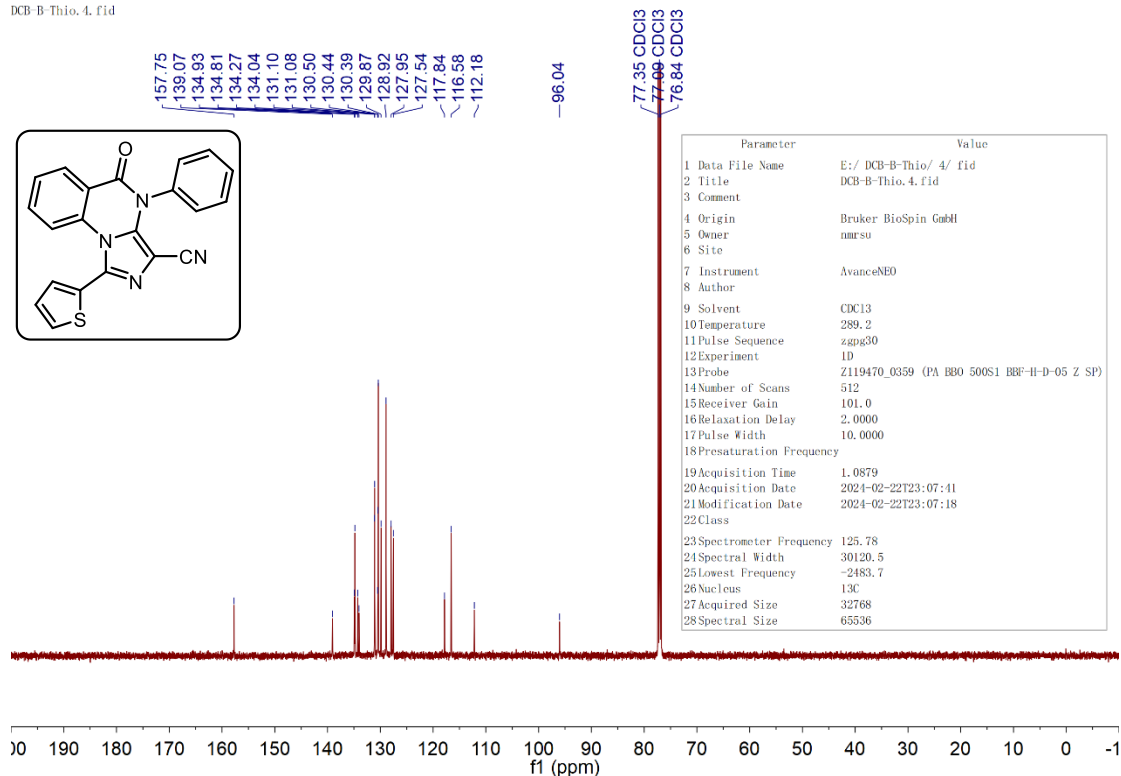

# 1-benzyl-5-oxo-4-phenyl-4,5-dihydroimidazo[1,5-a]quinazoline-3-carbonitrile (4aj)

DCB-B-BnCH2NH2. 1. fid

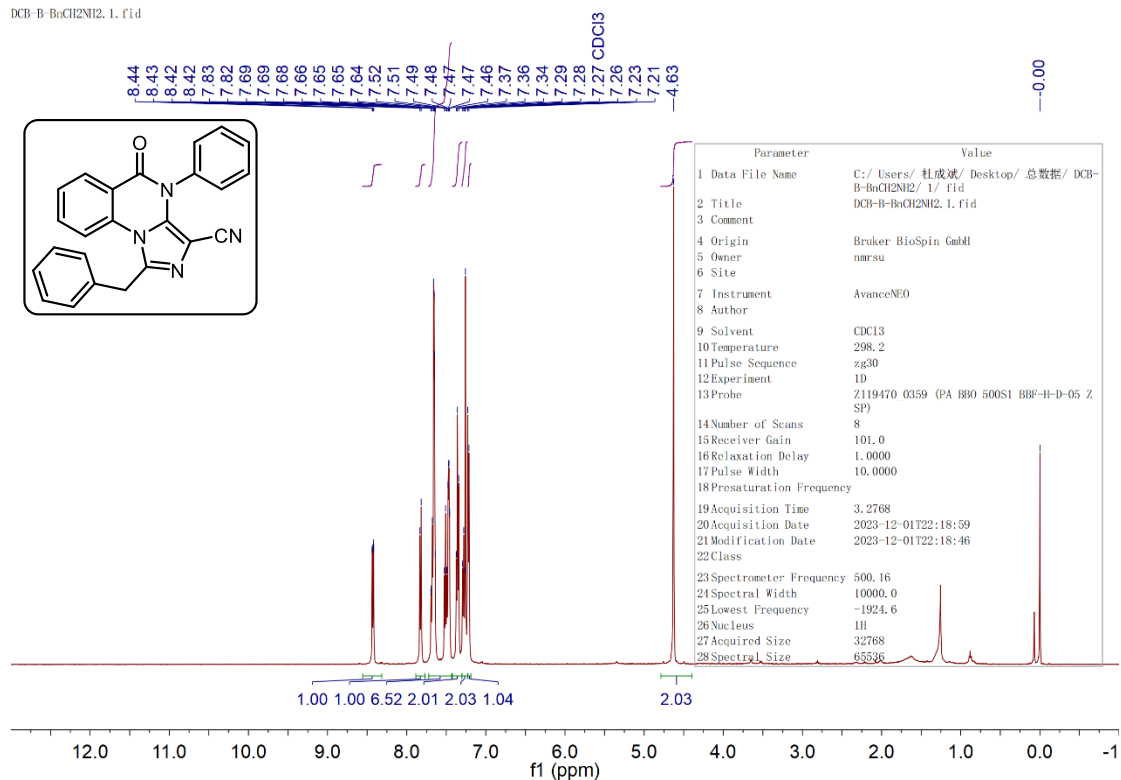

DCB-B-BnCH2NH2. 2. fid

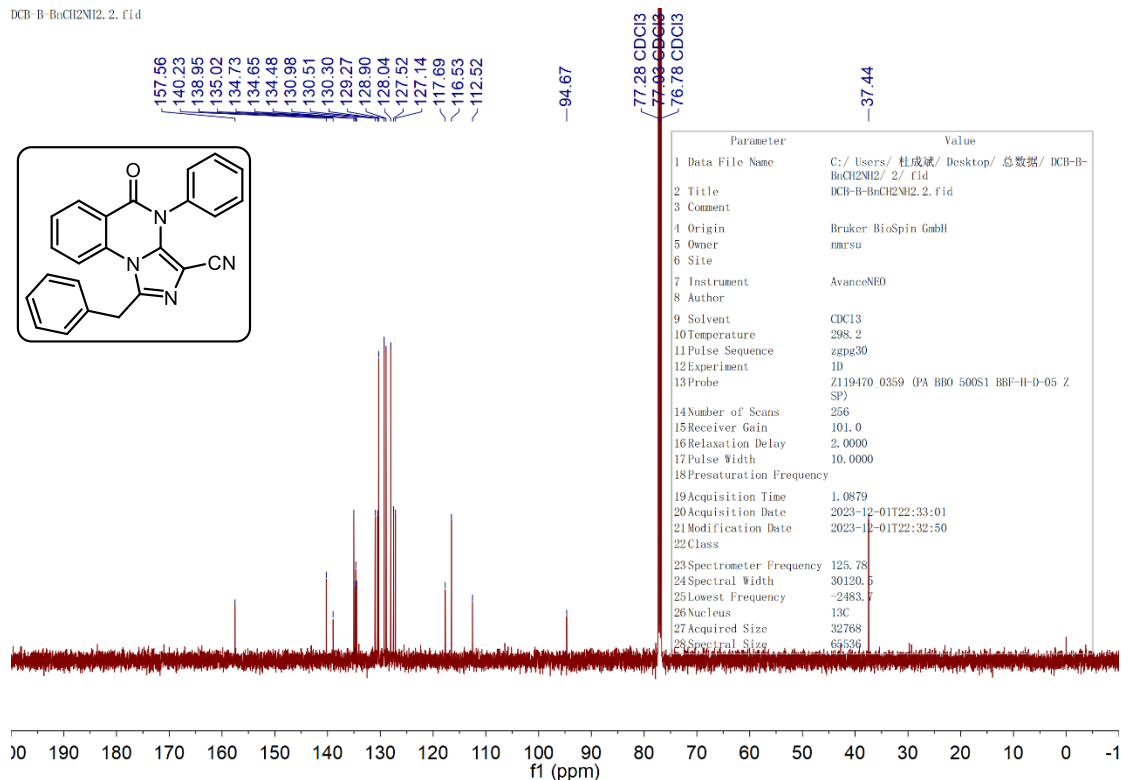

Supplement: d4cc00994k1.pdf [file d4cc00994k1.pdf]
